# Supplementary material for: The ART of conversation: feasibility and acceptability of a pilot peer intervention to help transition complex HIV-positive people from hospital to community
Source: PubMed Central journal article supplement — BMJ Open. 2019 Mar 30;9(3):e026674. doi: 10.1136/bmjopen-2018-026674 (PMC6475144; doi:10.1136/bmjopen-2018-026674), 2019-03-30
Supplement: bmjopen-2018-026674.draft_revisions.pdf [file bmjopen-2018-026674.draft_revisions.pdf]

# BMJ Open

BMJ Open is committed to open peer review. As part of this commitment we make the peer review history of every article we publish publicly available.

When an article is published we post the peer reviewers' comments and the authors' responses online. We also post the versions of the paper that were used during peer review. These are the versions that the peer review comments apply to.

The versions of the paper that follow are the versions that were submitted during the peer review process. They are not the versions of record or the final published versions. They should not be cited or distributed as the published version of this manuscript.

BMJ Open is an open access journal and the full, final, typeset and author-corrected version of record of the manuscript is available on our site with no access controls, subscription charges or pay-per-view fees (<http://bmjopen.bmj.com>).

If you have any questions on BMJ Open's open peer review process please email [info.bmjopen@bmj.com](mailto:info.bmjopen@bmj.com)

# BMJ Open

## The ART of conversation: Feasibility and acceptability of a pilot peer intervention to help complex HIV-positive people transition from hospital to community

|                               |                                                                                                                                                                                                                                                                                                                                                                                                                                                                                                                                                                                                                                                                                                                                                                                                                                                                                                                                                        |
|-------------------------------|--------------------------------------------------------------------------------------------------------------------------------------------------------------------------------------------------------------------------------------------------------------------------------------------------------------------------------------------------------------------------------------------------------------------------------------------------------------------------------------------------------------------------------------------------------------------------------------------------------------------------------------------------------------------------------------------------------------------------------------------------------------------------------------------------------------------------------------------------------------------------------------------------------------------------------------------------------|
| Journal:                      | <i>BMJ Open</i>                                                                                                                                                                                                                                                                                                                                                                                                                                                                                                                                                                                                                                                                                                                                                                                                                                                                                                                                        |
| Manuscript ID                 | bmjopen-2018-026674                                                                                                                                                                                                                                                                                                                                                                                                                                                                                                                                                                                                                                                                                                                                                                                                                                                                                                                                    |
| Article Type:                 | Research                                                                                                                                                                                                                                                                                                                                                                                                                                                                                                                                                                                                                                                                                                                                                                                                                                                                                                                                               |
| Date Submitted by the Author: | 17-Sep-2018                                                                                                                                                                                                                                                                                                                                                                                                                                                                                                                                                                                                                                                                                                                                                                                                                                                                                                                                            |
| Complete List of Authors:     | Eaton, Andrew; University of Toronto, Factor-Inwentash Faculty of Social Work; AIDS Committee of Toronto<br>Chan Carusone, Soo; Casey House; McMaster University, Department of Health Research Methods, Evidence, and Impact<br>Craig, Shelley; University of Toronto, Factor-Inwentash Faculty of Social Work<br>Telegdi, Erin; Casey House<br>McCullagh, John; AIDS Committee of Toronto<br>McClure, David; AIDS Committee of Toronto<br>Wilson, Walter; AIDS Committee of Toronto<br>Zuniga, Leonardo; AIDS Committee of Toronto<br>Berney, Kevin; AIDS Committee of Toronto<br>Ginocchio, Galo; AIDS Committee of Toronto<br>Wells, Gordon; AIDS Committee of Toronto<br>Montess, Michael; AIDS Committee of Toronto<br>Busch, Adam; AIDS Committee of Toronto<br>Boyce, Nick; Ontario HIV and Substance Use Training Program<br>Strike, Carol; University of Toronto, Dalla Lana School of Public Health<br>Stewart, Ann; St. Michael's Hospital |
| Keywords:                     | HIV & AIDS < INFECTIOUS DISEASES, Substance misuse < PSYCHIATRY, QUALITATIVE RESEARCH, SOCIAL MEDICINE                                                                                                                                                                                                                                                                                                                                                                                                                                                                                                                                                                                                                                                                                                                                                                                                                                                 |
|                               |                                                                                                                                                                                                                                                                                                                                                                                                                                                                                                                                                                                                                                                                                                                                                                                                                                                                                                                                                        |

SCHOLARONE™  
Manuscripts

1  
2  
3 **The ART of conversation: Feasibility and acceptability of a pilot peer intervention to help complex HIV-**  
4 **positive people transition from hospital to community**  
5

6 Andrew D. Eaton<sup>1,2\*</sup>, Soo Chan Carusone<sup>3,4</sup>, Shelley L. Craig<sup>1</sup>, Erin Telegdi<sup>3</sup>, John W. McCullagh<sup>2</sup>, David  
7 McClure<sup>2</sup>, Walter Wilson<sup>2</sup>, Leonardo Zuniga<sup>2</sup>, Kevin Berney<sup>2</sup>, Galo F. Ginocchio<sup>2</sup>, Gordon A. Wells<sup>2</sup>,  
8 Michael Montess<sup>2</sup>, Adam Busch<sup>2</sup>, Nick Boyce<sup>5</sup>, Carol Strike<sup>6</sup>, Ann Stewart<sup>3,7</sup>  
9  
10

11 <sup>1</sup>Factor-Inwentash Faculty of Social Work, University of Toronto; Toronto, ON, Canada  
12

13 <sup>2</sup>AIDS Committee of Toronto (ACT); Toronto, ON, Canada  
14

15 <sup>3</sup>Casey House (CH); Toronto, ON, Canada  
16

17 <sup>4</sup>Department of Health Research Methods, Evidence, and Impact; Hamilton, ON, Canada  
18

19 <sup>5</sup>Ontario HIV and Substance Use Training Program; Toronto, ON, Canada  
20

21 <sup>6</sup>Dalla Lana School of Public Health, University of Toronto; Toronto, ON, Canada  
22

23 <sup>7</sup>St. Michael's Hospital; Toronto, ON, Canada  
24

25  
26 \*Corresponding author. Factor-Inwentash Faculty of Social Work, University of Toronto. 246 Bloor St.  
27 W., Toronto, ON, Canada, M5S1V4 Phone: +1-416-978-8895. Email: [andrew.eaton@utoronto.ca](mailto:andrew.eaton@utoronto.ca).  
28

29 **Word count: 3,984**  
30  
31  
32  
33  
34  
35  
36  
37  
38  
39  
40  
41  
42  
43  
44  
45  
46  
47  
48  
49  
50  
51  
52  
53  
54  
55  
56  
57  
58  
59  
60

## Abstract

**Objectives:** To pilot test a peer-based intervention for people living with HIV who used substances and had challenges with antiretroviral adherence, and would be discharged from hospital to community.

**Study design:** A community-based, quasi-experimental pilot intervention study designed to assess feasibility, acceptability, and connection to a community-based HIV organization.

**Setting:** This study was conducted in Toronto, Canada at Casey House (CH; HIV/AIDS hospital) in collaboration with the AIDS Committee of Toronto (ACT; community-based HIV organization).

**Participants:** People living with HIV who were: CH inpatient between April 1, 2017 and March 31, 2018; struggled with antiretroviral adherence; actively used substances; and would be discharged to community were eligible. Approximately 40 people met criteria, 19 were approached by an inpatient nurse and 17 consented. Average age was 49 (SD=11), 59% were male, and participants averaged 8 comorbidities (SD=3). Twelve participants completed the intervention and nine connected with ACT.

**Intervention:** Titled *The ART of Conversation*, the three-pronged personalized intervention was developed through input from CH clients and ACT volunteers, all living with HIV. Intervention components were: a) pre-discharge goal-setting (adherence, substance use, self-identified goal) with the study nurse; b) pre-discharge meeting with an HIV+ peer volunteer (PV); and c) nine post-discharge phone calls between PV and participant, once/day for three days then once/week for six weeks.

**Primary Outcomes:** Feasibility was measured through proportion of eligible participants recruited, availability of PVs, and connection to ACT. Acceptability was assessed through participant interviews at three times (pre-intervention, post-intervention, 6-week follow-up) and through PV call logs.

**Results:** Pre-discharge goal-setting and PV meeting were both feasible and acceptable. Phone calls were a challenge following discharge (half of completers missed at least one call), although participants still connected with ACT services.

**Conclusions:** Although pre-discharge goal-setting and PV meeting were feasible, methods to maintain connection following discharge require further investigation.

**Keywords:** HIV & AIDS; Substance misuse; Social medicine; Qualitative research

### Strengths and limitations of this study

- Patient and public involvement was prioritized throughout this study as people living with HIV co-designed the study and intervention, delivered the intervention, and collected and analyzed data.
- Peer support models have been identified as a priority area by policymakers to improve care transitions for people living with HIV.
- Interventions for a study population with severe medical and psychosocial complexity who are at high-risk of poor health outcomes need to be tested for feasibility and acceptability before launching a larger scale study.
- The key limitations are: the lack of a control group and randomization, which were not possible within our recruitment timeline and sampling frame; a potentially biased sample, as not all eligible participants were approached; and incomplete participation, as half of participants missed at least one post-discharge phone call.

## 1.0 Introduction

Hospital discharge can result in discontinuity of care, non-adherence to medications, and other negative outcomes [1], especially for people living with HIV [2, 3] who face complex medical and psychosocial challenges [4]. Medical and psychosocial complexity is multiple, overlapping issues that affect a person's health [5]. People living with HIV may experience complex medical issues (e.g., frequent hospitalizations, poor medication adherence, polypharmacy, concurrent comorbidities, etc.) [6, 7]. Psychosocial factors may overlap with health challenges, (e.g., increased substance use, homelessness, unemployment, social isolation, food insecurity, etc.) [8, 9, 10]. These complex difficulties can interrupt the cascade of care and increase the risk of mortality [1]; in particular, substance use is a priority area of focus for care retention interventions [11].

The cascade of care (i.e., HIV treatment cascade or the HIV care continuum) is a framework recommended by UNAIDS for member countries to measure their progress in ending the AIDS epidemic [2]. Individual countries, and individual states and provinces within those countries, have adapted this continuum to fit their local contexts [12, 13] and consulted patients in its local implementation [14]. However, a common end-point is universal amongst these frameworks: retention in care (i.e., attending regular medical appointments, accessing community supports) and maintaining viral suppression (<50 copies of HIV per millilitre of blood, meaning that people living with HIV cannot sexually transmit the virus) [16, 17]. Complex clients living with HIV are often hospitalized to re-adhere to medications and progress on the care cascade; however, the discharge transition can cause cascade regression and poor health outcomes [18]. 'Peer' interventions, provided by trained community members who share lived experience with clients, may be a helpful and cost-effective complement to outpatient clinical care in order to help people living with HIV maintain the health progress that they achieved in hospital [19, 20].

Meaningful involvement of people living with HIV as peers has been central throughout the history of HIV and AIDS [20, 21]. As governments were slow to respond to AIDS in its early years, people living with and affected by HIV formed community-based agencies and implemented peer-based models of care [21, 22]. Yet peer models are understudied amongst people living with both HIV and complex issues; most work focuses on prevention in the HIV-negative population [21, 23, 24, 25] or a single issue (most commonly, medication adherence) in the HIV-positive population [19, 20]. Peer interventions that address the more complex realities that some people living with HIV experience are recommended in policy, especially ones that improve linkages between clinical and community-based care [26, 27].

To design a peer intervention that could help people living with both HIV and complex issues in the transition from hospital to community, we used the theories of Community-Based Participatory Research (CBPR) and Minimally Disruptive Medicine (MDM). CBPR recommends the equitable involvement of the client population in the design and conduct of a study [28], which aligns with this study's aim to pilot a peer intervention. MDM suggests that new interventions may have better results when designed to fit within the context of people's lives [29]. In this study, CBPR was utilized through extensive consultation and involvement of people living with HIV where the recommendation for the study's intervention – goal setting, peer meeting, and post-discharge phone calls – was designed to be as minimally disruptive and acceptable to participants as possible.

1  
2  
3 With the context of the study's setting at Casey House (CH), a 14-bed HIV hospital with an  
4 average 45-day inpatient admission, and funding (one-year CBPR grant), a quasi-experimental pilot was  
5 developed to test peer intervention components for feasibility and acceptability.  
6  
7

### 8 **1.1 Objectives**

9

10 This study had two objectives. First, to pilot test a peer-based intervention for people living with  
11 HIV who had challenges with antiretroviral adherence and substance use and would be discharged from  
12 hospital to community; this study of feasibility and acceptability was conducted to determine whether  
13 intervention components could be applied in a larger trial. Second, to connect participants to the AIDS  
14 Committee of Toronto (ACT) – Canada's largest community-based HIV organization – for further post-  
15 discharge support. As this is a peer intervention, patient and public involvement (PPI) was prioritized so  
16 that people living with HIV had an active role in the study's design and conduct.  
17  
18  
19

### 20 **2.0 Methods**

21

22 This study used primarily qualitative methods to evaluate proof-of-concept of a pilot peer  
23 intervention that involved people living with HIV in the study's design and conduct.  
24  
25

#### 26 **2.1 Study design**

27

28 Participants were enrolled into a personalized three-stage peer-based intervention.  
29 Approximately forty people were included in the sampling frame (see participant flow below). Neither  
30 randomization nor a control group were feasible.  
31

#### 32 **2.2 Patient and public involvement**

33

34 People living with HIV became involved in this study as the concept was being developed. First, a  
35 community-based exploratory study interviewed CH clients about the discharge transition and found  
36 that participants were requesting peer support [18]. Second, two CH client engagement sessions (n=17,  
37 all HIV-positive) were held regarding the structure of a post-discharge peer program, including:  
38 duration; content; definition of 'peer'; how peers should be trained; and how the pilot should be  
39 evaluated. Third, a group consultation was held with ACT volunteers (n=10) who live with HIV and who  
40 provide direct service (e.g., support groups). This consultation discussed: the peer program requested by  
41 CH clients; program structure; evaluation methods including draft questionnaires; and whether  
42 attendees would engage with the study as a peer volunteer (delivering the intervention) or peer  
43 researcher (interviewing participants and analyzing data). Finally, one more CH client session (n=6) was  
44 facilitated by a peer researcher to continue developing the study questionnaires and intervention  
45 details. Based on these consultations, we defined 'peer' as a person living with HIV who has personal or  
46 relational experience with substance use.  
47  
48  
49  
50

51 Five peer researchers attended a 1.5 day, 11.5-hour training; the curriculum has been published  
52 elsewhere [30]. The main training component was filmed simulation, where peer researchers were  
53 video-recorded conducting simulated interviews to observe their verbal and non-verbal interactions  
54  
55  
56  
57  
58  
59  
60

1  
2  
3 [31]. Peer researchers refined the study questionnaires, collected all data, and participated in the  
4 analysis.  
5

6  
7 Five peer volunteers (PV) from ACT delivered this intervention. These volunteers completed a  
8 total of 44 training hours. The first 22 hours were dedicated to ACT's core skills volunteer training which  
9 covers: creating safe and accessible spaces; HIV and health promotion basics; concepts in  
10 communication; and anti-oppression and cultural competence. The volunteers then attended 22 hours  
11 of training specific to the intervention which focused on: harm reduction; structuring a phone call;  
12 communication tools; and self-care.  
13  
14

## 15 **2.3 Participants**

16  
17 An inpatient nurse at an HIV hospital identified people living with HIV who met inclusion criteria  
18 (based on admission details) and approached them regarding their interest in learning more about the  
19 three-stage peer program. If people were interested, the principal investigator then met with them for  
20 enrolment.  
21  
22

### 23 **2.3.1 Eligibility criteria**

24  
25 Inclusion criteria: People who are HIV-positive; actively using substances (e.g., cocaine, crystal meth,  
26 etc.); inpatient at CH between April 1, 2017 and March 31, 2018; initiated/re-started antiretroviral  
27 therapy while they are inpatient at CH; going to be discharged back to the community; English-speaking;  
28 can access a phone; and can provide informed consent. Exclusion criteria: People who already  
29 participated in this study.  
30  
31

### 32 **2.3.2 Settings**

33  
34 This study was conducted as a partnership between: a) Casey House (CH), Canada's only  
35 standalone HIV/AIDS hospital with fourteen inpatient beds and located in downtown Toronto; and b)  
36 the AIDS Committee of Toronto (ACT), Canada's largest community-based HIV/AIDS organization and  
37 located in downtown Toronto. CH was responsible for chart abstraction, goal setting and hosting the  
38 peer meeting. ACT was responsible for enrolling participants, training and supervision of PVs, and  
39 coordinating connection to community-based care.  
40  
41

### 42 **2.3.3 Participant identification and consent**

43  
44 A study nurse (fourth author) identified participants based on their admission presentation (i.e.,  
45 identified substance use and ART initiation/re-initiation). The nurse approached participants to  
46 introduce the study and, if they were interested in learning more, then referred them to the principal  
47 investigator (first author) for consent. To participate in the study, participants consented to the research  
48 and to becoming ACT clients. The consent process also involved discussion with participants of  
49 preferences regarding PV matches (e.g., schedule).  
50  
51  
52  
53  
54  
55  
56  
57  
58  
59  
60



## 2.4 Intervention

The intervention consisted of three distinct stages. Participants set discharge goals with the recruiting nurse, then met with a PV prior to discharge. Following discharge, participants scheduled nine phone calls with their PVs over seven weeks.

### 2.4.1 Goal-setting

The study nurse met with participants during their inpatient admission to help them identify three goals that they wanted to achieve after discharge. One goal was related to their ART adherence, another related to their substance use, and a third personal goal. These goals were written on a Community Transition Planning (CTP) form (see supplementary file) that was designed based on principles of Motivational Interviewing, whereby the facilitators and barriers to a goal are thoroughly discussed [32]. Participants identified the change they wanted to make, the steps necessary to make this change, support people (both personal and professional supports), their importance and confidence at making the change, and significant events that would occur following discharge. Goal-setting occurred one week prior to discharge, and typically lasted half an hour. The forms were shared with PVs prior to their meetings with participants.

### 2.4.2 Peer volunteer (PV) meeting

The principal investigator matched a PV with a participant and the dyad met at CH to discuss the participant's CTP form, how the participant was feeling about leaving hospital, and the details of phone support (e.g., when to call, what to talk about, etc.). Discharge goals were further refined in this meeting. PVs were encouraged to self-identify shared experiences that might be relevant (e.g., substance use). This meeting occurred in the week leading up to discharge and usually took 45 minutes.

### 2.4.3 Post-discharge phone calls

The PV phoned the participant once per day for the three days following discharge, then once per week for the following six weeks. This schedule was determined through client consultation; people living with HIV stated that the first 72 hours following discharge were the most difficult and when their risk of relapse was highest. Calls commonly lasted 20-45 minutes and focused on discharge goals and other issues arising for participants, with a focus on connection to community-based services.

## 2.5 Outcomes

Feasibility was measured through: a) the proportion of eligible participants who were recruited, consented, and completed the study; b) PV availability; and c) connection to ACT (measured as accessing any ACT service within thirteen weeks of discharge). Acceptability was assessed through participant interviews at three times (pre-discharge, post-intervention, and 6-week follow-up) and through logs written by PVs following each phone call.

### 2.5.1 Measures

The intervention components were assessed qualitatively, with participants scheduled to complete three in-depth, semi-structured interviews with peer researchers (also living with HIV). The first interview occurred at CH following the PV meeting but prior to discharge, with questions on goal-setting and peer meeting components; medication adherence; substance use; community supports; and overall health. The second interview occurred at ACT at conclusion of peer support (week 7 following discharge). Questions from the first interview were repeated alongside probes for feedback on the post-discharge phone calls and the helpfulness of PVs sharing their own experiences. The third interview was held at ACT six weeks after the program's end (week 13 following discharge) and, alongside repeated questions from the first and second interview, focused on supports that the participant had accessed due to the peer program. Interviews were audio-recorded and averaged 00:41:20 in length.

PVs completed a contact log of each call, noting the call's content and rating how they felt the participant was doing individually, interpersonally, socially, and overall. These ratings were completed using the Outcome Rating Visual Analog Scale [33], where PVs placed a mark on a 10cm unnumbered line; instructions stated that marks to the left represented 'not well at all' and marks to the right indicated 'excellent'.

### 2.6 Sample size

A sample size of fifteen was selected for feasibility as: a) CH has an average 100 admissions per year; b) a clinical estimate based on retrospective chart review found that approximately half of admissions met this study's criteria; c) the hospital moved locations during our recruitment year, disrupting some services; and d) this sample size would allow the team to assess the feasibility and acceptability of intervention components across diverse experiences.

### 2.7 Data analysis

Research assistants (authors ten to twelve) transcribed interviews and entered data. The entire team held three iterative analysis meetings (four hours each) to read through the data and discuss how findings corresponded to the study's objectives. To qualitatively assess proof-of-concept, illuminating quotes were identified concerning facilitators and barriers of each intervention component. Contact log data is presented as a spaghetti plot; while the sample size limits our ability to interpret these findings, they provide context for the quotes.

### 3.0 Results

The participant flow and characteristics are presented, followed by numbers analyzed and outcomes concerning the feasibility and acceptability of intervention components. Participant quotes include a unique identifier and gender.

### 3.1 Participant flow

Figure 1 shows the flow of participants throughout the study. Only half of those eligible were approached due to poor health and risk of mortality for some in hospital.

### 3.2 Recruitment

A CH nurse approached people who: a) were inpatient at CH during the period of April 1, 2017 to March 31, 2018; b) self-identified substance use and challenges with antiretroviral adherence. Nineteen people were approached and two declined, leaving seventeen consenting to participate. Follow-up occurred seven weeks following discharge (second interview) and thirteen weeks following discharge (interview three), with the final interview occurring on July 11, 2018. The pilot program ended at this time due to the one-year funding agreement.

### 3.3 Baseline data

Refer to Table 1 for participant characteristics at admission, abstracted from their chart.

**Table 1: Participant characteristics (n=17, unless specified otherwise)**

| Characteristic                    | N (%) / Mean (SD) |
|-----------------------------------|-------------------|
| <b>Gender</b>                     |                   |
| Male                              | 10 (59%)          |
| Female                            | 7 (41%)           |
| <b>Age (years)</b>                | 49 (SD=11)        |
| <b>Income Source</b>              |                   |
| ODSP                              | 11 (65%)          |
| Other                             | 6 (35%)           |
| <b>Employment Status</b>          |                   |
| On disability                     | 11 (65%)          |
| Unemployed                        | 6 (35%)           |
| <b>Comorbidities</b>              |                   |
| Mental health diagnoses           | 3 (SD=1)          |
| Total comorbidities               | 8 (SD=3)          |
| <b>Housing prior to admission</b> |                   |
| Independent living                | 9 (53%)           |
| Supportive housing                | 5 (29%)           |
| Shelter                           | 1 (6%)            |
| Street-involved                   | 1 (6%)            |
| Rooming house                     | 1 (6%)            |

|                                                  |                            |
|--------------------------------------------------|----------------------------|
| <b>Housing following discharge</b>               |                            |
| Independent living                               | 9 (53%)                    |
| Supportive housing                               | 6 (35%)                    |
| Rooming house                                    | 1 (6%)                     |
| Unknown                                          | 1 (6%)                     |
| <b>Reason for admission</b>                      |                            |
| ART re-/initiation                               | 7 (41%)                    |
| Psychosocial issues                              | 5 (29%)                    |
| Acute medical condition                          | 2 (12%)                    |
| Respite                                          | 2 (12%)                    |
| Post-surgical recovery                           | 1 (6%)                     |
| <b>Years living with HIV</b>                     | 16 (SD=9)                  |
| <b>CD4 (N=14)</b>                                |                            |
| >500                                             | 5 (36%)                    |
| 200-500                                          | 4 (29%)                    |
| <200                                             | 5 (36%)                    |
| <b>*Substances identified</b>                    |                            |
| Crack cocaine                                    | 8 (47%)                    |
| Opioids                                          | 5 (29%)                    |
| Crystal meth                                     | 5 (29%)                    |
| *most common                                     |                            |
| <b>Total # of medications at discharge</b>       | 12 (SD=6)                  |
| <b>Post-discharge care</b>                       |                            |
| Family doctor                                    | 17 (100%)                  |
| Allied health (nursing, psychiatry, social work) | 17 (100%)                  |
| Substance use program                            | 9 (53%)                    |
| HIV specialist                                   | 7 (41%)                    |
| Adherence reminders                              | 5 (29%)                    |
| <b>Length of admission</b>                       | 44 days (SD=42), Median=26 |

### 3.4 Numbers analyzed

For feasibility, results are presented against a denominator of 19 (number of participants approached); this includes two people who declined to participate and seven who did not complete the intervention. For acceptability, a denominator of 12 is used as this number participated in all intervention components and completed follow-up interviews.

### 3.5 Outcomes

The intervention was feasible to recruit and coordinate, and led to participant connection to ACT services. The first two intervention components (goal-setting and peer volunteer meeting) were highly acceptable to participants, while the third (post-discharge phone calls) was well-received by half of completers but the other half had challenges engaging by phone. Patient and Public Involvement (PPI) contributed positively to study outcomes. Throughout the interviews, participants stated how much they appreciated that people living with HIV collaborated in the study's design, delivered the intervention, and conducted their interviews.

#### 3.5.1 Feasibility

Overall, 63% (n=12) of participants who were approached completed the intervention with 57% (n=11) of the total sample connecting to ACT services. Interestingly, two participants who did not complete the intervention (one was lost to follow-up and we were unable to match the other with a peer volunteer) still connected to ACT. ACT services that participants accessed included counselling, support groups, and lunch programs.

Within a one-year recruitment timeline, five PVs were matched with sixteen participants (i.e., each volunteer had approximately three matches); there was only one instance where no volunteer was available to be matched with a participant. PPI may have contributed to ease of recruitment, as potential participants had heard about the study and contributed to its design. PVs received modest compensation at \$150 per match.

#### 3.5.2 Acceptability

The goal-setting and peer meeting components were acceptable to participants, with strong participation and positive feedback in interviews. Post-discharge phone calls were a challenge, as half of the participants who participated in this component (n=6) lost their phones, changed their numbers, and/or did not answer at some point over the six weeks of the program. This left six participants completing all nine calls as scheduled. From the twelve participants who engaged with phone calls, the mean number of calls per match was 5.75.

##### 3.5.2.1 Goal-setting results

Most participants (n=15) identified goals for the seven weeks after discharge related to: 1) antiretroviral adherence; 2) substance use; and 3) a personal goal. Participants rated their importance and confidence of each goal on a scale from '1' (not at all) to '10' (very much); figure 2 shows these results.

Participants expressed a high degree of confidence in achieving their adherence goals, despite a reported history of challenges. Substance use goals were primarily abstinence-based and had the lowest confidence of success. Open-ended goals were identified as the most important and primarily focused on improving living space and social connections.

### 3.5.2.2 Peer volunteer meeting results

Thirteen participants met with an ACT peer volunteer at CH, following goal-setting and prior to discharge, to discuss upcoming discharge, goals, and to make a plan for post-discharge phone calls. Participants appreciated the opportunity to meet with a peer; this was their first non-clinical service interaction during their hospital stay. As one person said, “He told me where he’s at...and I shared a bit, [I was] thinking this guy is going to be a counsellor...and then I realized, huh, this guy’s on my level” (P3, male).

In the consultations with people living with HIV to design this study, the issue of demographics was raised regarding whether people would be able to connect across ages, genders, etc. Participants felt comfortable connecting with their volunteer regardless of these identities, with one participant saying:

I wasn’t expecting somebody that young to be able to interact with me and understand me...I was even more comfortable when she told me she had HIV. And then I forgot all about [demographics], like we started talking you know she knows how to interact. It’s not a thing anybody can do. It’s not just about asking the questions it’s about making the person feel comfortable and she did that with me (P6, female).

### 3.5.2.3 Post-discharge phone call results

Peer volunteers phoned participants once per day for the first three days following discharge, then once per week for the following six weeks. The phone calls were the most challenging component of this intervention as half of the participants lost their phones, changed their numbers, and/or did not answer at some point over the program’s duration. Participants engaged well while on the phone, speaking with peer volunteers about their discharge goals, other issues in their lives, and how to improve their health and social engagement.

Some participants appreciated the flexibility of phone calls and felt they could engage with a peer volunteer in this manner, as one person said:

The way we were able to interact, communicate, understand. It was like he understood everything I was saying and I understood everything he was saying. And it was great. I couldn’t imagine not having someone like him. Yes, because it made me think, how do I explain it, in the last few years, I’ve been stuck in a hole. Like it just flew, no one to talk to, not one to help, nowhere to reach out, no nothing. When [Volunteer] came along it was like having a peer in a different type of background and culture (P9, male).

Other participants indicated that the phone calls felt impersonal and that in-person peer support was preferable, with a participant saying “I’m just not a phone person...I don’t know, I just can’t. It’s easier [in-person], you don’t really know somebody [over the phone]” (P1, female).

Figure 3 displays the Visual Analog Scale results from the PV call logs. PVs rated how each participant was doing individually, socially, interpersonally, and overall with 0 representing ‘not well’ and 10 representing ‘excellent’. Overall, the most difficult period was 1-2 weeks post-discharge with

1  
2  
3 participants improving by 5-6 weeks after leaving hospital. Participants who were lost to follow-up were  
4 rated lower than people who completed the program.  
5

### 6 7 **3.6 Harms**

8  
9 There were no reported study-related harms.

## 10 11 **4.0 Discussion**

12  
13 The principal findings of this pilot are that: a) pre-discharge goal-setting and a peer volunteer  
14 meeting were feasible and acceptable for a sample of people living with HIV and complex needs; b)  
15 while some participants appreciated post-discharge phone calls, others experienced barriers to this  
16 method of engagement; and c) a clinical and a community-based HIV organization can partner for  
17 improved connection to care.  
18  
19

20  
21 Compared to other studies, a strength of this study was its substantial involvement of people  
22 living with HIV at multiple stages. This PPI approach may have made recruitment easier and contributed  
23 towards the positive experience that participants had with multiple intervention components [34].  
24 Another strength was this study's focus on people with complex needs; participants averaged eight  
25 comorbidities (e.g., AIDS, cancer, hepatitis C) and are commonly lost to follow-up from outpatient  
26 clinical care at CH, so the finding that 65% (n=11) connected with ACT services suggests that peer  
27 support can be a helpful catalyst in the discharge transition [20]. This study's primary weaknesses are  
28 the lack of randomization and control; other peer support studies have found significant effects in larger  
29 samples by focusing on a single issue of concern [19, 20]. A PPI weakness was the mixed results from the  
30 post-discharge phone calls, a component of the intervention that was specifically requested from  
31 current and former CH clients. In-person peer support has shown better outcomes than post-discharge  
32 phone calls in other quasi-experimental studies [35, 36].  
33  
34  
35

36  
37 For clinicians, this study presents two intervention components – pre-discharge goal setting and  
38 peer meeting – that can be feasibly incorporated into practice at low cost and time commitment which  
39 may ease the discharge transition for people experiencing complex medical and psychosocial needs. For  
40 policymakers, this study responds to a call for greater collaboration between clinical and community-  
41 based care [26] by highlighting how a hospital and a community agency can partner to provide peer  
42 support.  
43  
44

45  
46 The goal-setting and peer meeting intervention components need to be tested in a larger trial  
47 with greater rigour and a sufficient sample, using standardized measures, to properly ascertain their  
48 effectiveness. Future research on post-discharge peer support with a complex population group should  
49 be more intensive than weekly phone contact; in-person follow-up, whether meeting in social spaces  
50 (such as coffee shops), home visits, or outpatients returning to hospital for post-discharge peer groups  
51 could be combined with phone calls as more supportive methods of retaining people in care.  
52  
53  
54  
55  
56  
57  
58  
59  
60

#### 4.1 Limitations

This study has several limitations. Without randomization and control and with a small sample, there remains uncertainty regarding the two promising intervention components (goal-setting and peer meeting). There is a risk of selection bias as eligible participants who were in particularly fragile health were not approached [37]. Incomplete participation amongst a small sample requires that the results be interpreted with some caution.

#### 4.2 Applicability

The goal-setting and peer meeting components show preliminary promise for easing the discharge transition for people living with HIV and complex needs. These components could be more rigorously tested by specialty hospitals, where peers can be adequately trained and supported, to address high rates of lost-to-follow-up and eventual readmission for complex clients.

#### 4.3 Interpretation

While there is some uncertainty regarding this study's benefits, a study of this nature does no harm. Peer support has been found effective on single issues regarding HIV (such as medication adherence); this study's attempt to pilot peer support regarding more complex needs is a first step towards better supporting the more marginalized people living with HIV who require more targeted support than is currently offered. The PPI approach helped facilitate study recruitment and the first two intervention components, yet the third component (post-discharge phone calls) received mixed results despite its PPI influence. This interpretation suggests that in a future definitive trial, post-discharge peer support could combine phone and in-person meetings. Multiple methods of engagement may be more acceptable to participants and contribute to greater completion rates, which could lead to better outcomes.

#### 5.0 Conclusion

This pilot study presents two intervention components (goal-setting and peer volunteer meeting) that have preliminary proof-of-concept in easing the discharge transition and connection to community-based care for people living with HIV and complex needs. More research is needed to determine the ideal form of post-discharge peer support for this population.

#### Author contributions

**ADE** oversaw all study activities, supervised personnel, consented participants, led the analysis and interpretation of results, and wrote the first draft of the manuscript. **SCC** led patient engagement activities and co-led analysis and interpretation of results. **SLC** co-led analysis and interpretation of results and met monthly with ADE and SCC to discuss study progress. **ET** facilitated participant goal-setting and coordinated peer volunteer meetings and discharge timing. **JWM, DM, WW, LZ, and KB** contributed to study design and collected data. **GFG, GAW, and MM** prepared data for analysis through transcription and data entry. **AB** and **NB** trained peer volunteers with ADE. **CS** and **AS** contributed to



1  
2  
3 study design and analysis. All the authors co-conceptualized the study, contributed to analysis, critically  
4 reviewed the manuscript, and approved the final submitted version of the manuscript.  
5

### 6 **Competing interests**

7  
8 There are no competing interests for any author.  
9

### 10 **Funding**

11  
12 This work was funded by the Ontario HIV Treatment Network (OHTN) through a Community-Based  
13 Research and Evaluation Grant (Grant number CBRG1074), with additional support from Universities  
14 Without Walls (UWW) and the Canadian Association for HIV Research (CAHR) through their Flipped  
15 Workshop mentoring program. ADE is supported by an Ontario Graduate Scholarship (OGS). SLC is a  
16 Canada Research Chair. The funders did not have a role in the design and conduct of the study, nor in  
17 the decision to submit the study for publication. This study was approved by the University of Toronto's  
18 HIV/AIDS Research Ethics Board (Protocol ID# 34124).  
19  
20  
21  
22

### 23 **Data sharing statement**

24  
25 No additional data available. Anyone interested in accessing the data reported in this article can write to  
26 the corresponding author who will consult with the University of Toronto's HIV/AIDS Research Ethics  
27 Board and respond as appropriate. Requests can be sent to [andrew.eaton@utoronto.ca](mailto:andrew.eaton@utoronto.ca).  
28  
29

### 30 **Acknowledgements**

31  
32 We wish to thank all our study participants for their voluntary participation, and all of the people living  
33 with HIV who contributed to the study's design. Thank you to Dr. Sharon Walmsley for critically  
34 reviewing this manuscript and to Leah Szadkowski and Minnie Cui for assistance with the figures.  
35  
36  
37  
38  
39  
40  
41  
42  
43  
44  
45  
46  
47  
48  
49  
50  
51  
52  
53  
54  
55  
56  
57  
58  
59  
60

## References

1. Allaudeen N, Vidyarthi A, Massell, J, Auerback A. Redefining readmission risk factors for general medicine patients. *J Hosp Med* 2011;6:54-60.
2. Kay ES, Batey DS, Mugavero MJ. The HIV treatment cascade and care continuum: Updates, goals, and recommendations for the future. *AIDS Res Ther* 2016;13:1-7. doi:10.1186/s12981-016-0120-0
3. Kimmel AD, Martin EG, Galadima H, et al. Clinical outcomes of HIV care delivery models in the US: A systematic review. *AIDS Care* 2016;28:1215-1222. doi:10.13039/100000060
4. Schaink AK, Kuluski K, Lyons RF, et al. A scoping review and thematic classification of patient complexity: Offering a unifying framework. *J Comorbid* 2012;2:1-9.
5. Grudniewicz A, Nelson M, Kuluski K, et al. Treatment goal setting for complex patients: Protocol for a scoping review. *BMJ Open* 2016;6(e011869). doi:10.1136/bmjopen-2016-011869
6. Omland LH, Ahlström MG, Obel N. Cohort profile update: The Danish HIV cohort study (DHCS). *Int J Epidemiol* 2014;43:1769-1769e. doi:10.1093/ije/dyu153
7. Hasse B, Ledergerder B, Furrer H, et al. Morbidity and aging in HIV-infected persons: The Swiss HIV cohort study. *Clin Infect Dis* 2011;53:1130-1139. doi:10.1093/cid/cir626
8. Bekele T, Globerman J, Watson J, et al. Prevalence and predictors of food insecurity among people living with HIV affiliated with AIDS service organizations in Ontario, Canada. *AIDS Care* 2018;30:663-671. doi:10.13039/501100000024
9. Halman M, Chan Carusone S, Stranks S, Schaefer-McDaniel N & Stewart A. Complex care needs of patients with late-stage HIV disease: A retrospective study. *AIDS Care* 2014;26:320-325. doi:10.1080/09540121.2013.819404
10. Rueda S, Law S, & Rourke SB. Psychosocial, mental health, and behavioral issues of aging with HIV. *Curr Opin HIV/AIDS* 2014;9:325-331. doi:10.1097/COH.0000000000000071
11. Szadkowski L, Walmsley S, Burchell AN, et al. High retention in HIV care at a tertiary care centre in Toronto, Canada. *AIDS Care* 2017;30:246-254.
12. Babatunde E, Medha I, Helmut A, Weissman, S. The South Carolina HIV cascade of care. *South Med J* 2015;108:670-674. doi:10.14423/SMJ.0000000000000368

- 1  
2  
3 13. Powers KA, Miller WC. Critical review: Building on the HIV cascade. *JAIDS* 2015;69:341-347.doi:  
4 10.1097/QAI.0000000000000611  
5  
6
- 7 14. Bruton J, Rai T, Day S, Ward H. Patient perspectives on the HIV continuum of care in London: A  
8 qualitative study of people diagnosed between 1986 and 2014. *BMJ Open* 2018;8(e0202208).  
9 doi:10.1136/bmjopen-2017-020208  
10  
11
- 12 15. Rachlis B, Burchell AN, Gardner S, et al. Social determinants of health and retention in HIV care  
13 in a clinical cohort in Ontario, Canada. *AIDS Care* 2016;29:828-837.  
14 doi:10.1080/09540121.2016.1271389  
15  
16
- 17 16. Cohen MS, Chen YQ, McCauley M, et al. Antiretroviral therapy for the prevention of HIV-1  
18 transmission. *N Engl J M* 2016;375:830-839. doi:10.1056/NEJMoa1600693  
19  
20
- 21 17. Rodger AJ, Cambiano V, Brunn T, et al. Sexual activity without condoms and risk of HIV  
22 transmission in serodifferent couples when the HIV-positive partner is using suppressive  
23 antiretroviral therapy. *JAMA* 2016;316:171-181. doi:10.1001/jama.2016.5148  
24  
25
- 26 18. Chan Carusone S, O'Leary B, McWatt S, Stewart A, Craig S, Brennan DJ. The lived experience of  
27 the hospital discharge "plan": A longitudinal qualitative study of complex patients. *J Hosp Med*  
28 2017;12:5-10.  
29  
30
- 31 19. Genberg BL, Shangani S, Sabatino K, et al. (2016). Improving engagement in the HIV care  
32 cascade: A systematic review of interventions involving people living with HIV/AIDS as peers.  
33 *AIDS Behav* 2016;20:2452. ISSN:1090-7165  
34  
35
- 36 20. Simoni JM, Nelson KM, Franks JC, Yard SS, Lehavot K. Are peer interventions for HIV efficacious?  
37 A systematic review. *AIDS and Behavior* 2011;15:1589-1595. ISSN:1090-7165  
38  
39
- 40 21. Shangani S, Escudero D, Kirwa K, Harrison, A, Marshall B, Operario D. Effectiveness of peer-led  
41 interventions to increase HIV testing among men who have sex with men: A systematic review  
42 and meta-analysis. *AIDS Care* 2017;29:1003-1011. ISSN:0954-0121  
43  
44
- 45 22. Eaton AD, Tsang AKT, Craig SL, Ginocchio, GF. (in press). Peer researchers in post-professional  
46 health: A glimpse at motivations and partial objectivity as opportunities for action researchers.  
47 *Action Res J*.  
48  
49
- 50 23. Kerrigan DL, Fonner VA, Stromdahl S, Kennedy, CE. Community empowerment among female  
51 sex workers is an effective HIV prevention intervention: A systematic review of the peer-  
52 reviewed evidence from low and middle-income countries. *AIDS Behav* 2013;17:1926-1940.  
53 ISSN:1090-7165  
54  
55  
56  
57  
58  
59  
60

- 1  
2  
3 24. Maticka-Tyndale E, Barnett JP. Peer-led interventions to reduce HIV risk of youth: A review.  
4 *Evalu Program Plann* 2010;33(2):98.  
5  
6  
7 25. Medley A, Kennedy C, O'Reilly K, Sweat M. Effectiveness of peer education interventions for HIV  
8 prevention in developing countries: A systematic review and meta-analysis. *AIDS Educ Prev*  
9 2009;21:181-206. ISSN:0899-9546  
10  
11  
12 26. Bacon J, the Ontario Advisory Committee on HIV/AIDS. HIV/AIDS strategy to 2026: Focusing our  
13 efforts – changing the course of the HIV prevention, engagement and care cascade in Ontario.  
14 *Ministry of Health and Long Term Care* 2016.  
15 [http://www.health.gov.on.ca/en/pro/programs/hivaids/docs/oach\\_strategy\\_2026.pdf](http://www.health.gov.on.ca/en/pro/programs/hivaids/docs/oach_strategy_2026.pdf)  
16  
17  
18 27. UNAIDS. Communities deliver: The critical role of communities in reaching global targets to end  
19 the AIDS epidemic. *UNAIDS* 2015.  
20 [http://www.unaids.org/sites/default/files/media\\_asset/UNAIDS\\_JC2725\\_CommunitiesDeliver\\_e](http://www.unaids.org/sites/default/files/media_asset/UNAIDS_JC2725_CommunitiesDeliver_e)  
21 [n.pdf](http://www.unaids.org/sites/default/files/media_asset/UNAIDS_JC2725_CommunitiesDeliver_e)  
22  
23  
24 28. Israel BA, Coombe CM, Cheezum RR, et al. Community-based participatory research: A capacity-  
25 building approach for policy advocacy aimed at eliminating health disparities. *Am J Public Health*  
26 2011;100:2094-2102. doi:10.2105/AJPH.2009.170506  
27  
28  
29 29. May C. We need minimally disruptive medicine. *BMJ* 2009;339(b2803). doi:10.1136/bmj.b2803  
30  
31  
32 30. Eaton AD, Ibáñez-Carrasco F, Craig SL, et al. (2018). A blended learning curriculum for training  
33 peer researchers to conduct community-based participatory research. *Action Learn Res Pract*  
34 2018;15:139-150. doi:10.1080/14767333.2018.1462143  
35  
36  
37 31. Eaton AD. (in press). Filmed simulation to train peer researchers in community-based  
38 participatory research. *Soc Work Res*.  
39  
40  
41 32. Hettema J, Steele J, Miller WR. Motivational interviewing. *Annu Rev Clin Psychol* 2005;1:91-111.  
42 doi:1146/annurev.clinpsy.1.102803.143833  
43  
44  
45 33. Campbell A, Hemsley S. (2009). Outcome rating scale and session rating scale in psychological  
46 practice: Clinical utility of ultra-brief measures. *Clin Psychol* 2009;13:1-9.  
47 doi:10.1080/13284200802676391  
48  
49  
50 34. Eaton AD, Cattaneo JS, Watchorn JM, et al. From serodiscordant to magnetic: The feasibility and  
51 acceptability of a pilot psychoeducational group intervention designed to improve relationship  
52 quality. *Soc Work with Groups* 2017;41:323-335. doi:10.1080/01609513.2017.1369922  
53  
54  
55  
56  
57  
58  
59  
60

- 1  
2  
3 35. Mash R, Mash RJ. A quasi-experimental evaluation of an HIV prevention programme by peer  
4 education in the Anglican church of the Western Cape, South Africa. *BMJ Open*  
5 2012;2(3000638). doi:10.1136/bmjopen-2011-000638  
6  
7  
8 36. Harper GW, Bangi AK, Sanchez B, Doll M, Pedraza A. A quasi-experimental evaluation of a  
9 community-based HIV prevention intervention for Mexican American female adolescents: The  
10 Shero's program. *AIDS Educ Prev* 2009;21:109-123.  
11  
12  
13 37. Henderson M, Page L. Appraising the evidence: What is selection bias? *Evidence-Based Ment*  
14 *Health* 2007;10:67-68.  
15  
16  
17  
18  
19  
20  
21  
22  
23  
24  
25  
26  
27  
28  
29  
30  
31  
32  
33  
34  
35  
36  
37  
38  
39  
40  
41  
42  
43  
44  
45  
46  
47  
48  
49  
50  
51  
52  
53  
54  
55  
56  
57  
58  
59  
60

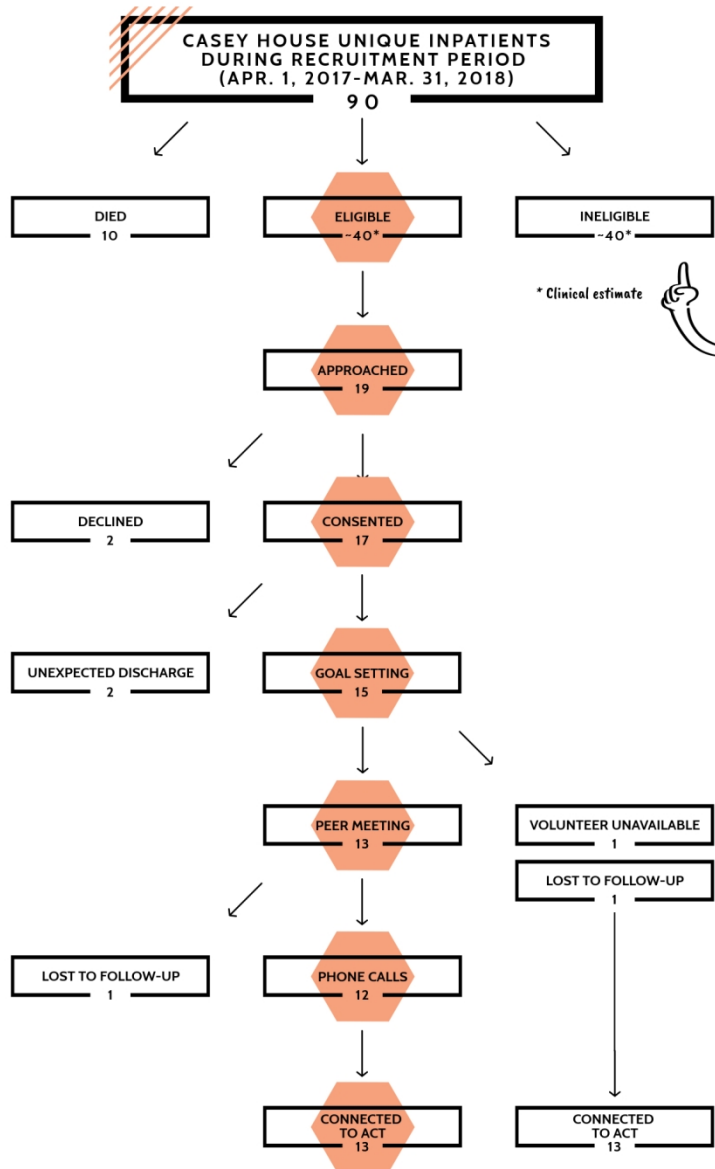

Figure 1: Participant flowchart

564x723mm (72 x 72 DPI)

1  
2  
3  
4  
5  
6  
7  
8  
9  
10  
11  
12  
13  
14  
15  
16  
17  
18  
19  
20  
21  
22  
23  
24  
25  
26  
27  
28  
29  
30  
31  
32  
33  
34  
35  
36  
37  
38  
39  
40  
41  
42  
43  
44  
45  
46  
47  
48  
49  
50  
51  
52  
53  
54  
55  
56  
57  
58  
59  
60

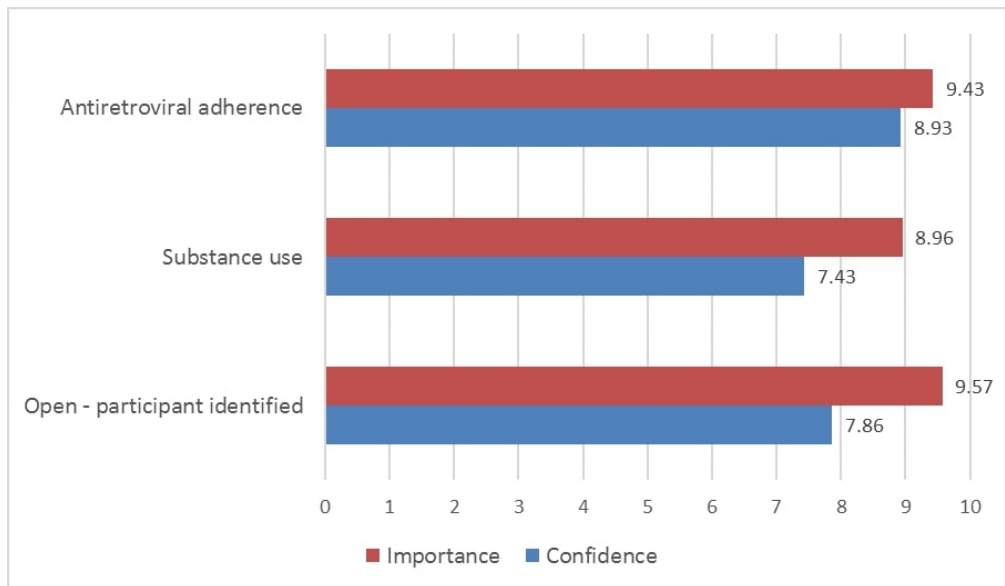

Figure 2: Participant assessment of goal importance and confidence

318x185mm (72 x 72 DPI)

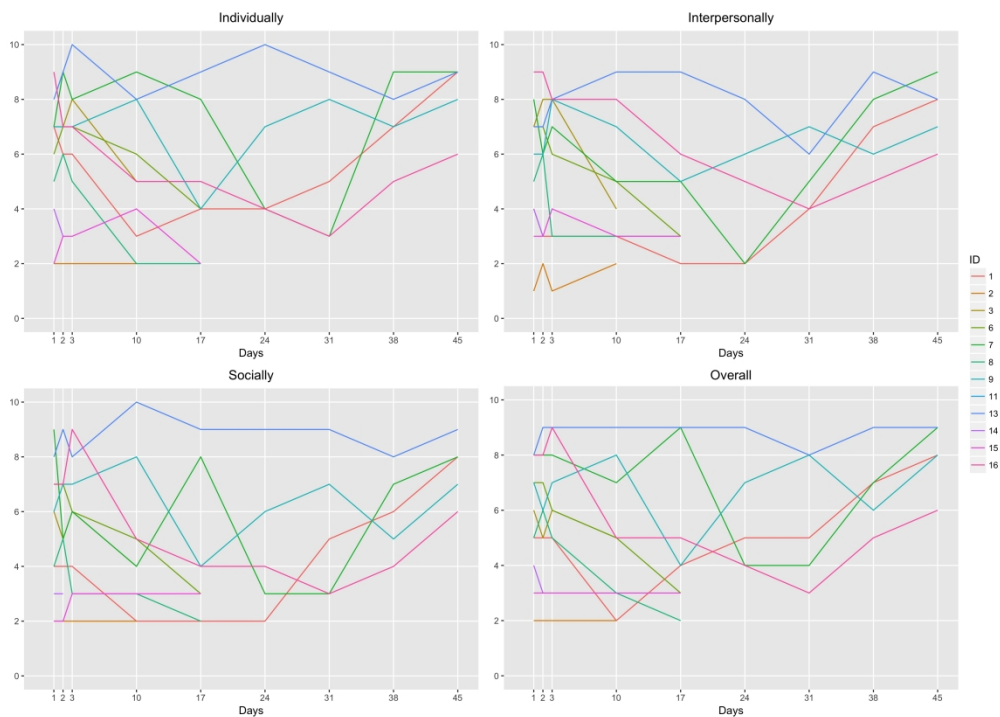

Figure 3: Peer volunteer assessment of participants

1481x1058mm (72 x 72 DPI)



## ART of Conversation – Community Transition Planning Forms (CTP)

### Community transition change plan

|                                                                                                                                                          |                                                                               |
|----------------------------------------------------------------------------------------------------------------------------------------------------------|-------------------------------------------------------------------------------|
| <b>Goal #1: HIV Medications</b><br><b>(Note: A CTP form is completed for each area identified by participant)</b>                                        |                                                                               |
| <i>The change I want to make (or continue making) is:</i>                                                                                                |                                                                               |
| <i>Some barriers or difficulties that may get in the way are:</i>                                                                                        |                                                                               |
| <i>The steps I plan to take in making this change are:</i>                                                                                               |                                                                               |
| <i>The person/agency/organization that can support me in making this change is:</i><br><i>Name:</i><br><i>Contact info:</i><br><i>How can they help:</i> |                                                                               |
| <i>How important is it to you to make this change?<br/> (1-10 scale)</i>                                                                                 | <i>How confident are you that you can make this<br/> change? (1-10 scale)</i> |

### Support people/agency/organization

| Name                                                                          | Role                            | Contact info.  |
|-------------------------------------------------------------------------------|---------------------------------|----------------|
| i.e. Chris Smith                                                              | A friend who helps walk my cat. | (416) 962-7600 |
| (Names the person puts forward while in the mind set of discharge transition) |                                 |                |
|                                                                               |                                 |                |
|                                                                               |                                 |                |

### Significant dates/appointments/events following discharge

| Date                     | Details                                                                                                                            |
|--------------------------|------------------------------------------------------------------------------------------------------------------------------------|
| i.e. Jan 1 <sup>st</sup> | My partners birthday                                                                                                               |
|                          | (Some significant dates will be in the chart/discharge summary but this completed box can venture beyond medical appts./referrals) |
|                          |                                                                                                                                    |
|                          |                                                                                                                                    |

Community transition change plan

|                                                                                                                              |                                                                      |
|------------------------------------------------------------------------------------------------------------------------------|----------------------------------------------------------------------|
| Goal #2: <b>Substance Use</b><br>(Note: A CTP form is completed for each area identified by participant)                     |                                                                      |
| The change I want to make (or continue making) is:                                                                           |                                                                      |
| Some barriers or difficulties that may get in the way are:                                                                   |                                                                      |
| The steps I plan to take in making this change are:                                                                          |                                                                      |
| The person/agency/organization that can support me in making this change is:<br>Name:<br>Contact info:<br>How can they help: |                                                                      |
| How important is it to you to make this change?<br>(1-10 scale)                                                              | How confident are you that you can make this change?<br>(1-10 scale) |

Support people/agency/organization

| Name                                                                          | Role                            | Contact info.  |
|-------------------------------------------------------------------------------|---------------------------------|----------------|
| i.e. Chris Smith                                                              | A friend who helps walk my cat. | (416) 962-7600 |
| (Names the person puts forward while in the mind set of discharge transition) |                                 |                |
|                                                                               |                                 |                |
|                                                                               |                                 |                |

Significant dates/appointments/events following discharge

| Date                     | Details                                                                                                                            |
|--------------------------|------------------------------------------------------------------------------------------------------------------------------------|
| i.e. Jan 1 <sup>st</sup> | My partners birthday                                                                                                               |
|                          | (Some significant dates will be in the chart/discharge summary but this completed box can venture beyond medical appts./referrals) |
|                          |                                                                                                                                    |
|                          |                                                                                                                                    |

Community transition change plan

|                                                                                                                              |                                                                   |
|------------------------------------------------------------------------------------------------------------------------------|-------------------------------------------------------------------|
| <b>Goal #3: Open - client-identified</b><br><b>(Note: A CTP form is completed for each area identified by participant)</b>   |                                                                   |
| The change I want to make (or continue making) is:                                                                           |                                                                   |
| Some barriers or difficulties that may get in the way are:                                                                   |                                                                   |
| The steps I plan to take in making this change are:                                                                          |                                                                   |
| The person/agency/organization that can support me in making this change is:<br>Name:<br>Contact info:<br>How can they help: |                                                                   |
| How important is it to you to make this change?<br>(1-10 scale)                                                              | How confident are you that you can make this change? (1-10 scale) |

Support people/agency/organization

| Name                                                                          | Role                            | Contact info.  |
|-------------------------------------------------------------------------------|---------------------------------|----------------|
| i.e. Chris Smith                                                              | A friend who helps walk my cat. | (416) 962-7600 |
| (Names the person puts forward while in the mind set of discharge transition) |                                 |                |
|                                                                               |                                 |                |
|                                                                               |                                 |                |

Significant dates/appointments/events following discharge

| Date                     | Details                                                                                                                            |
|--------------------------|------------------------------------------------------------------------------------------------------------------------------------|
| i.e. Jan 1 <sup>st</sup> | My partners birthday                                                                                                               |
|                          | (Some significant dates will be in the chart/discharge summary but this completed box can venture beyond medical appts./referrals) |
|                          |                                                                                                                                    |
|                          |                                                                                                                                    |

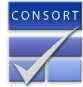

## CONSORT 2010 checklist of information to include when reporting a pilot or feasibility trial\*

| Section/Topic                    | Item No | Checklist item                                                                                                                                                                              | Reported on page No |
|----------------------------------|---------|---------------------------------------------------------------------------------------------------------------------------------------------------------------------------------------------|---------------------|
| <b>Title and abstract</b>        |         |                                                                                                                                                                                             |                     |
|                                  | 1a      | Identification as a pilot or feasibility randomised trial in the title                                                                                                                      | 1                   |
|                                  | 1b      | Structured summary of pilot trial design, methods, results, and conclusions (for specific guidance see CONSORT abstract extension for pilot trials)                                         | 2                   |
| <b>Introduction</b>              |         |                                                                                                                                                                                             |                     |
| Background and objectives        | 2a      | Scientific background and explanation of rationale for future definitive trial, and reasons for randomised pilot trial                                                                      | 4-5                 |
|                                  | 2b      | Specific objectives or research questions for pilot trial                                                                                                                                   | 5                   |
| <b>Methods</b>                   |         |                                                                                                                                                                                             |                     |
| Trial design                     | 3a      | Description of pilot trial design (such as parallel, factorial) including allocation ratio                                                                                                  | 5                   |
|                                  | 3b      | Important changes to methods after pilot trial commencement (such as eligibility criteria), with reasons                                                                                    | N/A                 |
| Participants                     | 4a      | Eligibility criteria for participants                                                                                                                                                       | 6                   |
|                                  | 4b      | Settings and locations where the data were collected                                                                                                                                        | 6                   |
|                                  | 4c      | How participants were identified and consented                                                                                                                                              | 6                   |
| Interventions                    | 5       | The interventions for each group with sufficient details to allow replication, including how and when they were actually administered                                                       | 7                   |
| Outcomes                         | 6a      | Completely defined prespecified assessments or measurements to address each pilot trial objective specified in 2b, including how and when they were assessed                                | 7-8                 |
|                                  | 6b      | Any changes to pilot trial assessments or measurements after the pilot trial commenced, with reasons                                                                                        | N/A                 |
|                                  | 6c      | If applicable, prespecified criteria used to judge whether, or how, to proceed with future definitive trial                                                                                 | N/A                 |
| Sample size                      | 7a      | Rationale for numbers in the pilot trial                                                                                                                                                    | 8                   |
|                                  | 7b      | When applicable, explanation of any interim analyses and stopping guidelines                                                                                                                | N/A                 |
| Randomisation:                   |         |                                                                                                                                                                                             |                     |
| Sequence generation              | 8a      | Method used to generate the random allocation sequence                                                                                                                                      | N/A                 |
|                                  | 8b      | Type of randomisation(s); details of any restriction (such as blocking and block size)                                                                                                      | N/A                 |
| Allocation concealment mechanism | 9       | Mechanism used to implement the random allocation sequence (such as sequentially numbered containers), describing any steps taken to conceal the sequence until interventions were assigned | N/A                 |

|                                                      |     |                                                                                                                                                                                       |             |
|------------------------------------------------------|-----|---------------------------------------------------------------------------------------------------------------------------------------------------------------------------------------|-------------|
| Implementation                                       | 10  | Who generated the random allocation sequence, who enrolled participants, and who assigned participants to interventions                                                               | N/A         |
| Blinding                                             | 11a | If done, who was blinded after assignment to interventions (for example, participants, care providers, those assessing outcomes) and how                                              | N/A         |
|                                                      | 11b | If relevant, description of the similarity of interventions                                                                                                                           | N/A         |
| Statistical methods                                  | 12  | Methods used to address each pilot trial objective whether qualitative or quantitative                                                                                                | 7-8         |
| <b>Results</b>                                       |     |                                                                                                                                                                                       |             |
| Participant flow (a diagram is strongly recommended) | 13a | For each group, the numbers of participants who were approached and/or assessed for eligibility, randomly assigned, received intended treatment, and were assessed for each objective | 9, Figure 1 |
|                                                      | 13b | For each group, losses and exclusions after randomisation, together with reasons                                                                                                      | 9, Figure 1 |
| Recruitment                                          | 14a | Dates defining the periods of recruitment and follow-up                                                                                                                               | 9           |
|                                                      | 14b | Why the pilot trial ended or was stopped                                                                                                                                              | 9           |
| Baseline data                                        | 15  | A table showing baseline demographic and clinical characteristics for each group                                                                                                      | 9-10        |
| Numbers analysed                                     | 16  | For each objective, number of participants (denominator) included in each analysis. If relevant, these numbers should be by randomised group                                          | 10          |
| Outcomes and estimation                              | 17  | For each objective, results including expressions of uncertainty (such as 95% confidence interval) for any estimates. If relevant, these results should be by randomised group        | 11-13       |
| Ancillary analyses                                   | 18  | Results of any other analyses performed that could be used to inform the future definitive trial                                                                                      | N/A         |
| Harms                                                | 19  | All important harms or unintended effects in each group (for specific guidance see CONSORT for harms)                                                                                 | 13          |
|                                                      | 19a | If relevant, other important unintended consequences                                                                                                                                  | N/A         |
| <b>Discussion</b>                                    |     |                                                                                                                                                                                       |             |
| Limitations                                          | 20  | Pilot trial limitations, addressing sources of potential bias and remaining uncertainty about feasibility                                                                             | 14          |
| Generalisability                                     | 21  | Generalisability (applicability) of pilot trial methods and findings to future definitive trial and other studies                                                                     | 14          |
| Interpretation                                       | 22  | Interpretation consistent with pilot trial objectives and findings, balancing potential benefits and harms, and considering other relevant evidence                                   | 14          |
|                                                      | 22a | Implications for progression from pilot to future definitive trial, including any proposed amendments                                                                                 | 14          |
| <b>Other information</b>                             |     |                                                                                                                                                                                       |             |
| Registration                                         | 23  | Registration number for pilot trial and name of trial registry                                                                                                                        | N/A         |
| Protocol                                             | 24  | Where the pilot trial protocol can be accessed, if available                                                                                                                          | N/A         |
| Funding                                              | 25  | Sources of funding and other support (such as supply of drugs), role of funders                                                                                                       | 15          |
|                                                      | 26  | Ethical approval or approval by research review committee, confirmed with reference number                                                                                            | 15          |

1  
2 Citation: Eldridge SM, Chan CL, Campbell MJ, Bond CM, Hopewell S, Thabane L, et al. CONSORT 2010 statement: extension to randomised pilot and feasibility trials. BMJ. 2016;355.  
3 \*We strongly recommend reading this statement in conjunction with the CONSORT 2010, extension to randomised pilot and feasibility trials, Explanation and Elaboration for important  
4 clarifications on all the items. If relevant, we also recommend reading CONSORT extensions for cluster randomised trials, non-inferiority and equivalence trials, non-pharmacological  
5 treatments, herbal interventions, and pragmatic trials. Additional extensions are forthcoming: for those and for up to date references relevant to this checklist, see [www.consort-statement.org](http://www.consort-statement.org).  
6  
7  
8  
9  
10  
11  
12  
13  
14  
15  
16  
17  
18  
19  
20  
21  
22  
23  
24  
25  
26  
27  
28  
29  
30  
31  
32  
33  
34  
35  
36  
37  
38  
39  
40  
41  
42  
43  
44  
45  
46  
47

For peer review only

## Guidance for Reporting Involvement of Patients and the Public 2 – Short Form (GRIPP2-SF)

| Section and topic                   | Item                                                                                                                                      | Reported on page No. |
|-------------------------------------|-------------------------------------------------------------------------------------------------------------------------------------------|----------------------|
| 1: Aim                              | Report the aim of PPI in the study                                                                                                        | 4                    |
| 2: Methods                          | Provide a clear description of the methods used for PPI in the study                                                                      | 5-6                  |
| 3: Study results                    | Outcomes—Report the results of PPI in the study, including both positive and negative outcomes                                            | 11                   |
| 4: Discussion and conclusions       | Outcomes—Comment on the extent to which PPI influenced the study overall. Describe positive and negative effects                          | 13                   |
| 5: Reflections/critical perspective | Comment critically on the study, reflecting on the things that went well and those that did not, so others can learn from this experience | 14                   |

# BMJ Open

## The ART of conversation: Feasibility and acceptability of a pilot peer intervention to help complex HIV-positive people transition from hospital to community

|                                 |                                                                                                                                                                                                                                                                                                                                                                                                                                                                                                                                                                                                                                                                                                                                                                                                                                                                                                                                        |
|---------------------------------|----------------------------------------------------------------------------------------------------------------------------------------------------------------------------------------------------------------------------------------------------------------------------------------------------------------------------------------------------------------------------------------------------------------------------------------------------------------------------------------------------------------------------------------------------------------------------------------------------------------------------------------------------------------------------------------------------------------------------------------------------------------------------------------------------------------------------------------------------------------------------------------------------------------------------------------|
| Journal:                        | <i>BMJ Open</i>                                                                                                                                                                                                                                                                                                                                                                                                                                                                                                                                                                                                                                                                                                                                                                                                                                                                                                                        |
| Manuscript ID                   | bmjopen-2018-026674.R1                                                                                                                                                                                                                                                                                                                                                                                                                                                                                                                                                                                                                                                                                                                                                                                                                                                                                                                 |
| Article Type:                   | Research                                                                                                                                                                                                                                                                                                                                                                                                                                                                                                                                                                                                                                                                                                                                                                                                                                                                                                                               |
| Date Submitted by the Author:   | 03-Jan-2019                                                                                                                                                                                                                                                                                                                                                                                                                                                                                                                                                                                                                                                                                                                                                                                                                                                                                                                            |
| Complete List of Authors:       | Eaton, Andrew; University of Toronto, Factor-Inwentash Faculty of Social Work; AIDS Committee of Toronto<br>Chan Carusone, Soo; Casey House; McMaster University, Department of Health Research Methods, Evidence, and Impact<br>Craig, Shelley; University of Toronto, Factor-Inwentash Faculty of Social Work<br>Telegdi, Erin; Casey House<br>McCullagh, John; AIDS Committee of Toronto<br>McClure, David; AIDS Committee of Toronto<br>Wilson, Walter; AIDS Committee of Toronto<br>Zuniga, Leonardo; AIDS Committee of Toronto<br>Berney, Kevin; AIDS Committee of Toronto<br>Ginocchio, Galo; AIDS Committee of Toronto<br>Wells, Gordon; AIDS Committee of Toronto<br>Montess, Michael; AIDS Committee of Toronto<br>Busch, Adam; AIDS Committee of Toronto<br>Boyce, Nick; Ontario Harm Reduction Network<br>Strike, Carol; University of Toronto, Dalla Lana School of Public Health<br>Stewart, Ann; St. Michael's Hospital |
| <b>Primary Subject Heading</b>: | HIV/AIDS                                                                                                                                                                                                                                                                                                                                                                                                                                                                                                                                                                                                                                                                                                                                                                                                                                                                                                                               |
| Secondary Subject Heading:      | Addiction, Qualitative research                                                                                                                                                                                                                                                                                                                                                                                                                                                                                                                                                                                                                                                                                                                                                                                                                                                                                                        |
| Keywords:                       | HIV & AIDS < INFECTIOUS DISEASES, Substance misuse < PSYCHIATRY, QUALITATIVE RESEARCH, SOCIAL MEDICINE                                                                                                                                                                                                                                                                                                                                                                                                                                                                                                                                                                                                                                                                                                                                                                                                                                 |
|                                 |                                                                                                                                                                                                                                                                                                                                                                                                                                                                                                                                                                                                                                                                                                                                                                                                                                                                                                                                        |

SCHOLARONE™  
Manuscripts



1  
2  
3 **The ART of conversation: Feasibility and acceptability of a pilot peer intervention to help complex HIV-**  
4 **positive people transition from hospital to community**  
5

6 Andrew D. Eaton<sup>1,2\*</sup>, Soo Chan Carusone<sup>3,4</sup>, Shelley L. Craig<sup>1</sup>, Erin Telegdi<sup>3</sup>, John W. McCullagh<sup>2</sup>, David  
7 McClure<sup>2</sup>, Walter Wilson<sup>2</sup>, Leonardo Zuniga<sup>2</sup>, Kevin Berney<sup>2</sup>, Galo F. Ginocchio<sup>2</sup>, Gordon A. Wells<sup>2</sup>,  
8 Michael Montess<sup>2</sup>, Adam Busch<sup>2</sup>, Nick Boyce<sup>5</sup>, Carol Strike<sup>6</sup>, Ann Stewart<sup>3,7</sup>  
9  
10

11 <sup>1</sup>Factor-Inwentash Faculty of Social Work, University of Toronto; Toronto, ON, Canada  
12

13 <sup>2</sup>AIDS Committee of Toronto (ACT); Toronto, ON, Canada  
14

15 <sup>3</sup>Casey House (CH); Toronto, ON, Canada  
16

17 <sup>4</sup>Department of Health Research Methods, Evidence, and Impact; Hamilton, ON, Canada  
18

19 <sup>5</sup>Ontario Harm Reduction Network; Toronto, ON, Canada  
20

21 <sup>6</sup>Dalla Lana School of Public Health, University of Toronto; Toronto, ON, Canada  
22

23 <sup>7</sup>St. Michael's Hospital; Toronto, ON, Canada  
24

25  
26 \*Corresponding author. Factor-Inwentash Faculty of Social Work, University of Toronto. 246 Bloor St.  
27 W., Toronto, ON, Canada, M5S1V4 Phone: +1-416-978-8895. Email: [andrew.eaton@utoronto.ca](mailto:andrew.eaton@utoronto.ca).  
28

29 **Word count: 4,698**  
30  
31  
32  
33  
34  
35  
36  
37  
38  
39  
40  
41  
42  
43  
44  
45  
46  
47  
48  
49  
50  
51  
52  
53  
54  
55  
56  
57  
58  
59  
60

## Abstract

**Objectives:** To pilot test a peer-based intervention for people living with HIV who used substances, had challenges with antiretroviral adherence, and would be discharged from hospital to community.

**Study design:** A community-based, quasi-experimental pilot intervention study designed to assess feasibility, acceptability, and connection to a community-based HIV organization.

**Setting:** This study was conducted in Toronto, Canada at Casey House (CH; hospital for people living with HIV) in collaboration with the AIDS Committee of Toronto (ACT; community-based HIV organization).

**Participants:** People living with HIV who were: CH inpatient between 01/04/2017 and 31/3/2018; struggled with antiretroviral adherence; actively used substances; and would be discharged to community were eligible. Approximately 40 people met criteria, 19 were approached by an inpatient nurse and 17 consented. Average age was 48.8 (SD=11.4), 58.8% were male, and participants averaged 7.8 comorbidities (SD=3.1). Twelve participants completed the intervention and nine connected with ACT.

**Intervention:** Titled *The ART of Conversation*, the three-pronged personalized intervention was developed through input from CH clients and ACT volunteers, all living with HIV. Intervention components were: a) pre-discharge goal-setting (adherence, substance use, self-identified goal) with the study nurse; b) pre-discharge meeting with an HIV+ peer volunteer (PV); and c) nine post-discharge phone calls between PV and participant, once/day for three days then once/week for six weeks.

**Primary Outcomes:** Feasibility was measured through proportion of eligible participants recruited, availability of PVs, and connection to ACT. Acceptability was assessed through participant interviews at three times (pre-intervention, post-intervention, 6-week follow-up) and through PV call logs.

**Results:** Pre-discharge goal-setting and PV meeting were both feasible and acceptable. Phone calls were a challenge following discharge (half of completers missed at least one call), although participants still connected with ACT services.

**Conclusions:** Although pre-discharge goal-setting and PV meeting were feasible, methods to maintain connection following discharge require further investigation.

## Keywords

HIV & AIDS; Substance misuse; Social medicine; Qualitative research

### Strengths and limitations of this study

- Patient and public involvement was prioritized throughout this study as people living with HIV co-designed the study and intervention, delivered the intervention, and collected and analyzed data.
- Peer support models have been identified as a priority area by policymakers to improve care transitions for people living with HIV.
- Interventions for a study population with severe medical and psychosocial complexity who are at high-risk of poor health outcomes need to be tested for feasibility and acceptability before launching a larger scale study.
- The key limitations are: the lack of a control group and randomization, which were not possible within our recruitment timeline and sampling frame; a potentially biased sample, as not all eligible participants were approached; and incomplete participation, as half of participants missed at least one post-discharge phone call.

## 1.0 Introduction

Hospital discharge can result in discontinuity of care, non-adherence to medications, and other negative outcomes [1], especially for people living with HIV [2, 3] who face complex medical and psychosocial challenges [4]. Medical and psychosocial complexity is multiple, overlapping issues that affect a person's health [5]. People living with HIV may experience complex medical issues (e.g., frequent hospitalizations, poor medication adherence, polypharmacy, concurrent comorbidities, etc.) [6, 7]. Psychosocial factors may overlap with health challenges, (e.g., increased substance use, homelessness, unemployment, social isolation, food insecurity, etc.) [8, 9, 10]. These complex difficulties can interrupt the cascade of care and increase the risk of mortality [1]; in particular, substance use is a priority area of focus for care retention interventions [11].

The cascade of care (i.e., HIV treatment cascade or the HIV care continuum) is a framework recommended by UNAIDS for member countries to measure their progress in ending the AIDS epidemic [2]. Individual countries, and individual states and provinces within those countries, have adapted this continuum to fit their local contexts [12, 13] and consulted patients in its local implementation [14, 15]. However, a common end-point is universal amongst these frameworks: retention in care (i.e., attending regular medical appointments, accessing community supports) and maintaining viral suppression (<50 copies of HIV per millilitre of blood, meaning that people living with HIV cannot sexually transmit the virus) [16, 17]. Complex clients living with HIV are often hospitalized to re-adhere to medications and progress on the care cascade; however, the discharge transition can cause cascade regression and poor health outcomes [18]. 'Peer' interventions, provided by trained community members who share lived experience with clients, may be a helpful and cost-effective complement to outpatient clinical care in order to help people living with HIV maintain the health progress that they achieved in hospital [19, 20].

Meaningful involvement of people living with HIV as peers has been central throughout the history of HIV and AIDS [20, 21]. From the first cases of AIDS to the present day, people living with and affected by HIV have been forming community-based agencies and implementing peer-based models of care [21, 22]. Yet peer models are understudied amongst people living with both HIV and complex issues; most work focuses on prevention in the HIV-negative population [21, 23, 24, 25] or a single issue (most commonly, medication adherence) in the HIV-positive population [19, 20]. Peer interventions that address the more complex realities that some people living with HIV experience are recommended in policy, especially ones that improve linkages between clinical and community-based care [26, 27].

To design a peer intervention that could help people living with both HIV and complex issues in the transition from hospital to community, we used the theories of Community-Based Participatory Research (CBPR) and Minimally Disruptive Medicine (MDM). CBPR recommends the equitable involvement of the client population in the design and conduct of a study [28], which aligns with this study's aim to pilot a peer intervention. MDM suggests that new interventions may have better results when designed to fit within the context of people's lives [29]. In this study, CBPR was utilized through extensive consultation and involvement of people living with HIV where the recommendation for the study's intervention – goal setting, peer meeting, and post-discharge phone calls – was designed to be as minimally disruptive and acceptable to participants as possible.

1  
2  
3 With the context of the study's setting at Casey House (CH), a 14-bed HIV hospital with an  
4 average 45-day inpatient admission, and funding (one-year CBPR grant), a quasi-experimental pilot was  
5 developed to test peer intervention components for feasibility and acceptability.  
6  
7

### 8 **1.1 Objectives**

9

10 This study had two objectives. First, to pilot test a peer-based intervention for people living with  
11 HIV who had challenges with antiretroviral adherence and substance use and would be discharged from  
12 hospital to community; this study of feasibility and acceptability was conducted to determine whether  
13 intervention components could be applied in a larger trial. Second, to connect participants to the AIDS  
14 Committee of Toronto (ACT) – Canada's largest community-based HIV organization – for further post-  
15 discharge support. As this is a peer intervention, patient and public involvement (PPI) was prioritized so  
16 that people living with HIV had an active role in the study's design and conduct.  
17  
18

### 19 **1.2 Study Settings**

20

21 This study was conducted as a partnership between Casey House (CH) and the AIDS Committee  
22 of Toronto (ACT) in downtown Toronto, Canada. CH is Canada's only standalone hospital for people  
23 living with HIV. CH has fourteen inpatient beds for sub-acute, palliative, and respite care. Inpatient  
24 admissions average approximately 45 days due to mortality risk amongst most patients. CH also offers  
25 community programs, and during the operation of this study launched a day health program to better  
26 support adults living with HIV and complex health and psychosocial conditions. ACT is Canada's largest  
27 community-based HIV/AIDS organization and offers prevention (i.e., safer sex outreach) and support  
28 (i.e., counselling, groups) for people living with and affected by HIV. CH was responsible for chart  
29 abstraction, goal setting and hosting the peer meeting. ACT was responsible for enrolling participants,  
30 training and supervision of PVs, and coordinating connection to community-based care.  
31  
32  
33  
34

## 35 **2.0 Methods**

36

37 This study used descriptive quantitative data and qualitative methods to evaluate feasibility and  
38 acceptability a pilot peer intervention that involved people living with HIV in the study's design and  
39 conduct.  
40  
41

### 42 **2.1 Study design**

43

44 Participants were enrolled into a personalized three-stage peer-based intervention.  
45 Approximately forty people were included in the sampling frame (see participant flow below). Neither  
46 randomization nor a control group were feasible due to the limited sampling frame and one-year  
47 timeline.  
48  
49

### 50 **2.2 Patient and public involvement**

51

52 People living with HIV became involved in this study as the concept was being developed and  
53 were engaged in four distinct activities. First, a community-based exploratory study interviewed CH  
54 clients about the discharge transition and found that participants were requesting peer support [18].  
55  
56  
57

1  
2  
3 Second, two CH client engagement sessions (n=17, all HIV-positive) were held regarding the structure of  
4 a post-discharge peer program, including: duration; content; definition of 'peer'; how peers should be  
5 trained; and how the pilot should be evaluated. CH clients living with HIV identified that post-discharge  
6 phone support could be easier to access than an in-person peer meeting. Third, a group consultation  
7 was held with ACT volunteers (n=10) who live with HIV and who provide direct service (e.g., support  
8 groups). This consultation discussed: the peer program requested by CH clients; program structure;  
9 evaluation methods including draft questionnaires; and whether attendees would engage with the study  
10 as a peer volunteer (delivering the intervention) or peer researcher (interviewing participants and  
11 analyzing data). Fourth, one more CH client session (n=6) was facilitated by a peer researcher to  
12 continue developing the study questionnaires and intervention details. Based on these consultations, we  
13 defined 'peer' as a person living with HIV who has personal or relational experience with substance use.  
14 There were two distinct groups of peers on this research team: a) peer researchers; and b) peer  
15 volunteers (PVs).  
16  
17  
18  
19  
20

21 Five peer researchers attended a 1.5 day, 11.5-hour training; the curriculum has been published  
22 elsewhere [30]. The main training component was filmed simulation, where peer researchers were  
23 video-recorded conducting simulated interviews to observe their verbal and non-verbal interactions  
24 [31]. Peer researchers refined the study questionnaires, collected all data, and participated in the  
25 analysis.  
26  
27

28 Five peer volunteers (PV) from ACT delivered this intervention. These volunteers completed a  
29 total of 44 training hours. The first 22 hours were dedicated to ACT's core skills volunteer training which  
30 covers: creating safe and accessible spaces; HIV and health promotion basics; concepts in  
31 communication; and anti-oppression and cultural competence. The volunteers then attended 22 hours  
32 of training specific to the intervention which focused on: harm reduction; structuring a phone call;  
33 communication tools; and self-care.  
34  
35

## 36 **2.3 Participants**

37  
38 An inpatient nurse at CH identified people living with HIV who met inclusion criteria (based on  
39 admission details) and approached them regarding their interest in learning more about the three-stage  
40 peer program. If people were interested, the principal investigator then met with them for enrolment.  
41  
42

### 43 **2.3.1 Eligibility criteria**

44  
45 Inclusion criteria: People who are HIV-positive; actively using illicit substances (e.g., cocaine, crystal  
46 meth, etc.); inpatient at CH between April 1, 2017 and March 31, 2018; initiated/re-started antiretroviral  
47 therapy while they are inpatient at CH; going to be discharged back to the community; English-speaking;  
48 can access a phone; and can provide informed consent. Exclusion criteria: People at risk of mortality.  
49  
50

### 51 **2.3.2 Participant identification and consent**

52  
53 A study nurse (fourth author) identified participants based on their admission presentation (i.e.,  
54 identified substance use and ART initiation/re-initiation). The nurse approached participants to  
55 introduce the study and, if they were interested in learning more, then referred them to the principal  
56  
57  
58  
59  
60

investigator (first author) for consent. To participate in the study, participants consented to the research and to becoming ACT clients. The consent process also involved discussion with participants of preferences regarding PV matches (e.g., schedule).

## 2.4 Intervention

The intervention consisted of three distinct stages. Participants set discharge goals with the recruiting nurse, then met with a PV prior to discharge. Following discharge, participants scheduled nine phone calls with their PVs over seven weeks.

### 2.4.1 Goal-setting

The study nurse met with participants during their inpatient admission to help them identify three goals that they wanted to achieve after discharge. A nurse was chosen to complete this activity as a means of bridging the clinical care that participants had received in hospital, with the peer support that they would be receiving after discharge. The nurse was trained in Motivational Interviewing (i.e., client-centred counselling to elicit positive goal-setting) [32] and harm reduction principles (i.e., stating that participants could set substance use goals concerning reduced or safer use, not solely abstinence). One goal was related to their ART adherence, another related to their substance use, and a third personal goal. These goals were written on a Community Transition Planning (CTP) form (see supplementary file) that was designed based on principles of Motivational Interviewing, whereby the facilitators and barriers to a goal are thoroughly discussed [32]. Participants identified the change they wanted to make, the steps necessary to make this change, support people (both personal and professional supports), their importance and confidence at making the change, and significant events that would occur following discharge. Goal-setting occurred one week prior to discharge, and typically lasted half an hour. The forms were shared with PVs prior to their meetings with participants.

### 2.4.2 Peer volunteer (PV) meeting

The principal investigator matched a PV with a participant, based on participant requests (e.g., similar substance use history, length of time living with HIV, gender, etc.). The dyad met at CH to discuss the participant's CTP form, how the participant was feeling about leaving hospital, and the details of phone support (e.g., when to call, what to talk about, etc.). Discharge goals were further refined in this meeting. PVs were encouraged to self-identify shared experiences that might be relevant (e.g., substance use). This meeting occurred in the week leading up to discharge and usually took 45 minutes.

### 2.4.3 Post-discharge phone calls

The PV phoned the participant once per day for the three days following discharge, then once per week for the following six weeks. This schedule was determined through client consultation; people living with HIV stated that the first 72 hours following discharge were the most difficult and when their risk of relapse was highest. Calls commonly lasted 20-45 minutes and focused on discharge goals and other issues arising for participants, with a focus on connection to community-based services.

## 2.5 Outcomes

The outcomes and measures are detailed below and in Table 1. Feasibility was measured through: a) the proportion of eligible participants who were recruited, consented, and completed the study; b) PV availability; and c) connection to ACT (measured as accessing any ACT service within thirteen weeks of discharge). Acceptability was assessed through participant interviews at three times (pre-discharge, post-intervention, and 6-week follow-up) and through logs written by PVs following each phone call.

| Outcomes      | Measures                                                                 | Description                                                                                                                                                                       |
|---------------|--------------------------------------------------------------------------|-----------------------------------------------------------------------------------------------------------------------------------------------------------------------------------|
| Feasibility   | Participant recruitment and retention                                    | Proportion of eligible participants who were recruited, consented, and completed the study                                                                                        |
|               | Peer volunteer (PV) availability                                         | Ability to match PVs with participants                                                                                                                                            |
|               | Connection to ACT                                                        | Participants accessing an ACT service (e.g., counselling, groups) within thirteen weeks after discharge                                                                           |
| Acceptability | Semi-structured interviews at three times, conducted by peer researchers | Interview 1: Following PV meeting, prior to discharge<br>Interview 2: Program conclusion (seven weeks after discharge)<br>Interview 3: Follow-up (thirteen weeks after discharge) |
|               | Contact logs                                                             | Reports from PVs following each phone call                                                                                                                                        |

### 2.5.1 Measures

The intervention components were assessed qualitatively, with participants scheduled to complete three in-depth, semi-structured interviews with peer researchers (also living with HIV). The first interview occurred at CH following the PV meeting but prior to discharge, with questions on goal-setting and peer meeting components; medication adherence; substance use; community supports; and overall health. The second interview occurred at ACT at conclusion of peer support (week 7 following discharge). Questions from the first interview were repeated alongside probes for feedback on the post-discharge phone calls and the helpfulness of PVs sharing their own experiences. The third interview was held at ACT six weeks after the program's end (week 13 following discharge) and, alongside repeated questions from the first and second interview, focused on supports that the participant had accessed due to the peer program. Interviews were audio-recorded and averaged 00:41:20 in length.

PVs completed a contact log of each call, noting the call's content and rating how they felt the participant was doing individually, interpersonally, socially, and overall. These ratings were completed



1  
2  
3 using the Outcome Rating Visual Analog Scale [33], where PVs placed a mark on a 10cm unnumbered  
4 line; instructions stated that marks to the left represented 'not well at all' and marks to the right  
5 indicated 'excellent'. PVs were trained to conduct these assessments through instruction on rating  
6 participants against how they presented in the initial peer volunteer meeting.  
7  
8

## 9 **2.6 Sample size**

10  
11 A sample size of fifteen was selected for feasibility as: a) CH has an average 80 discrete  
12 admissions annually; b) a clinical estimate based on retrospective chart review found that approximately  
13 half of admissions met this study's criteria; c) the hospital moved locations during our recruitment year,  
14 disrupting recruitment for approximately one month; and d) based on existing pilot studies, this sample  
15 size would allow the team to assess the feasibility and acceptability of intervention components across  
16 diverse experiences [34, 35].  
17  
18

## 19 **2.7 Data analysis**

20  
21 Research assistants (authors ten to twelve) transcribed interviews and entered data. The entire  
22 team held three iterative analysis meetings (four hours each) to read through the data and apply  
23 content analysis. Content analysis, as used in other qualitative assessments of intervention research [36]  
24 included discussion on how findings corresponded to the study's objectives, and which quotes  
25 illuminated the facilitators and barriers of each intervention component [37]. Contact log data is  
26 presented as a spaghetti plot; while the sample size limits our ability to interpret these findings, they  
27 provide context for the quotes.  
28  
29  
30

## 31 **3.0 Results**

32  
33 The participant flow and characteristics are presented, followed by numbers analyzed and outcomes  
34 concerning the feasibility and acceptability of intervention components. Participant quotes include a  
35 unique identifier and gender.  
36  
37

### 38 **3.1 Participant flow**

39  
40 Figure 1 shows the flow of participants throughout the study. Of the ninety discrete inpatient  
41 admissions at CH during the recruitment period, 73 were excluded due to: a) an eligibility review of  
42 admission presentation, namely mortality risk (n=21) and unidentified substance use (n=40); b) death in  
43 hospital (n=10); and c) declining to participate (n=2).  
44  
45

### 46 **3.2 Recruitment**

47  
48 A CH nurse approached people who: a) were inpatient at CH during the period of April 1, 2017  
49 to March 31, 2018; b) self-identified substance use and challenges with antiretroviral adherence.  
50 Nineteen people were approached and two declined, leaving seventeen consenting to participate.  
51 Follow-up occurred seven weeks following discharge (second interview) and thirteen weeks following  
52 discharge (interview three), with the final interview occurring on July 11, 2018. The pilot program ended  
53 at this time due to the one-year funding agreement.  
54  
55  
56  
57  
58  
59  
60

### 3.3 Baseline data

Participants were predominately male (58.8%, n=10) and had an average age of 48.8 (SD=11.4). Comorbidities (M=7.8, SD=3.1) most commonly were cancer, hepatitis C, and COPD; participants also had mental health diagnoses (M=3.2, SD=1.5), most commonly mood disorders (e.g., bipolar, depression) and organic mental disorders (e.g., HIV-associated neurocognitive disorder). Substances identified were mostly cocaine (47.1%, n=8), opioids (29.4%, n=5), and crystal meth (29.4%, n=5). Participants were in hospital for an average of 44.3 days (SD=42.4) and were taking an average of 11.8 (SD=6.2) medications at discharge. Refer to Table 2 for further participant characteristics.

| Table 2: Participant characteristics (n=17, unless specified otherwise) |                   |
|-------------------------------------------------------------------------|-------------------|
| Characteristic                                                          | N (%) / Mean (SD) |
| <b>Gender</b>                                                           |                   |
| Male                                                                    | 10 (58.8%)        |
| Female                                                                  | 7 (41.2%)         |
| <b>Age (years)</b>                                                      | 48.8 (SD=11.4)    |
| <b>Income Source</b>                                                    |                   |
| ODSP                                                                    | 11 (64.7%)        |
| Other                                                                   | 6 (35.3%)         |
| <b>Employment Status</b>                                                |                   |
| On disability                                                           | 11 (64.7%)        |
| Unemployed                                                              | 6 (35.3%)         |
| <b>Comorbidities</b>                                                    |                   |
| Mental health diagnoses                                                 | 3.2 (SD=1.5)      |
| Total comorbidities                                                     | 7.8 (SD=3.1)      |
| <b>Housing prior to admission</b>                                       |                   |
| Independent living                                                      | 9 (52.9%)         |
| Supportive housing                                                      | 5 (29.4%)         |
| Shelter                                                                 | 1 (5.9%)          |
| Street-involved                                                         | 1 (5.9%)          |
| Rooming house                                                           | 1 (5.9%)          |
| <b>Housing following discharge</b>                                      |                   |
| Independent living                                                      | 9 (52.9%)         |
| Supportive housing                                                      | 6 (35.3%)         |
| Rooming house                                                           | 1 (5.9%)          |
| Unknown                                                                 | 1 (5.9%)          |

|                                                  |                                   |
|--------------------------------------------------|-----------------------------------|
| <b>Reason for admission</b>                      |                                   |
| ART re-/initiation                               | 7 (41.2%)                         |
| Psychosocial issues                              | 5 (29.4%)                         |
| Acute medical condition                          | 2 (11.8%)                         |
| Respite                                          | 2 (11.8%)                         |
| Post-surgical recovery                           | 1 (5.9%)                          |
| <b>Years living with HIV</b>                     | 16.2 (SD=9.1)                     |
| <b>CD4 (N=14)</b>                                |                                   |
| >500                                             | 5 (35.7%)                         |
| 200-500                                          | 4 (28.6%)                         |
| <200                                             | 5 (35.7%)                         |
| <b>*Substances identified</b>                    |                                   |
| Crack cocaine                                    | 8 (47.1%)                         |
| Opioids                                          | 5 (29.4%)                         |
| Crystal meth                                     | 5 (29.4%)                         |
| *most common                                     |                                   |
| <b>Total # of medications at discharge</b>       | 11.8 (SD=6.2)                     |
| <b>Post-discharge care</b>                       |                                   |
| Family doctor                                    | 17 (100%)                         |
| Allied health (nursing, psychiatry, social work) | 17 (100%)                         |
| Substance use program                            | 9 (52.9%)                         |
| HIV specialist                                   | 7 (41.2%)                         |
| Adherence reminders                              | 5 (29.4%)                         |
| <b>Length of admission</b>                       | 44.3 days (SD=42.4),<br>Median=26 |

### 3.4 Numbers analyzed

For feasibility, results are presented against a denominator of 19 (number of participants approached); this includes two people who declined to participate and seven who did not complete the intervention. For acceptability, a denominator of 12 is used as this number participated in all intervention components and completed follow-up interviews.

### 3.5 Outcomes

The intervention was feasible to recruit and coordinate, and led to participant connection to ACT services. The first two intervention components (goal-setting and peer volunteer meeting) were highly acceptable to participants, while the third (post-discharge phone calls) was well-received by half of completers but the other half had challenges engaging by phone. Patient and Public Involvement (PPI)

1  
2  
3 contributed positively to study outcomes. Throughout the interviews, participants stated how much  
4 they appreciated that people living with HIV collaborated in the study's design, delivered the  
5 intervention, and conducted their interviews.  
6  
7

### 8 **3.5.1 Feasibility**

9  
10 Overall, 63% (n=12) of participants who were approached completed the intervention with 57%  
11 (n=11) of the total sample connecting to ACT services. Interestingly, two participants who did not  
12 complete the intervention (one was lost to follow-up and we were unable to match the other with a  
13 peer volunteer) still connected to ACT. ACT services that participants accessed included counselling,  
14 support groups, and lunch programs.  
15  
16

17 Within a one-year recruitment timeline, five PVs were matched with sixteen participants (i.e.,  
18 each volunteer had approximately three matches); there was only one instance where no volunteer was  
19 available to be matched with a participant. PPI may have contributed to ease of recruitment, as  
20 potential participants had heard about the study and contributed to its design. PVs received modest  
21 compensation at \$150 per match.  
22  
23

### 24 **3.5.2 Acceptability**

25  
26 The goal-setting and peer meeting components were acceptable to participants, with strong  
27 participation and positive feedback in interviews. Post-discharge phone calls were a challenge, as half of  
28 the participants who participated in this component (n=6) lost their phones, changed their numbers,  
29 and/or did not answer at some point over the six weeks of the program. This left six participants  
30 completing all nine calls as scheduled. From the twelve participants who engaged with phone calls, the  
31 mean number of calls per match was 5.8 Acceptability results for each intervention component are  
32 detailed below.  
33  
34  
35

#### 36 **3.5.2.1 Goal-setting acceptability**

37  
38 Most participants (n=15) identified goals for the seven weeks after discharge related to: 1)  
39 antiretroviral adherence; 2) substance use; and 3) a personal goal (most commonly, housing and social  
40 connection). Participants rated their importance and confidence of each goal on a scale from '1' (not at  
41 all) to '10' (very much); figure 2 shows these results.  
42  
43

44 Participants expressed a high degree of confidence in achieving their adherence goals, despite a  
45 reported history of challenges. Substance use goals were primarily abstinence-based and had the lowest  
46 confidence of success. Open-ended goals were identified as the most important and primarily focused  
47 on improving living space and social connections. One participant described the goal-setting process  
48 thusly:  
49  
50

51 [The nurse and I] went over my needs and my goals. Where my frame of mind was at. What  
52 things did I think would help me turn this rig around, kinda? [The nurse] figured who I could see  
53 to help me along the way...she was top shelf, y'know?... Like hey, yeah, she let me talk and she  
54 let me kind of lead the way and then she wrote down [my goals]. It [took] about twenty  
55  
56  
57

1  
2  
3 minutes, and then again after she wrote everything down and she filled out her form, then came  
4 back and showed me...to verify she had captured everything (P15, male).  
5

6  
7 Another participant talked about how familiarity with the nurse helped the goal-setting process:

8 Me and [nurse] have always gotten along great. Well, I get along with all the nurses but there's a  
9 couple that I can talk to about anything and she's one of them...it made me think, let's try this  
10 [program]. Give it a fair shot (P16, female).  
11  
12

### 13 **3.5.2.2 Peer volunteer meeting acceptability**

14  
15 Thirteen participants met with an ACT peer volunteer at CH, following goal-setting and prior to  
16 discharge, to discuss upcoming discharge, goals, and to make a plan for post-discharge phone calls.  
17 Participants appreciated the opportunity to meet with a peer; this was their first non-clinical service  
18 interaction during their hospital stay. As one person said, "He told me where he's at...and I shared a bit,  
19 [I was] thinking this guy is going to be a counsellor...and then I realized, huh, this guy's on my level" (P3,  
20 male).  
21  
22

23  
24 In the consultations with people living with HIV to design this study, the issue of demographics  
25 was raised regarding whether people would be able to connect across ages, genders, etc. Participants  
26 felt comfortable connecting with their volunteer regardless of these identities, with one participant  
27 saying:  
28

29  
30 I wasn't expecting somebody that young to be able to interact with me and understand me...I  
31 was even more comfortable when she told me she had HIV. And then I forgot all about  
32 [demographics], like we started talking you know she knows how to interact. It's not a thing  
33 anybody can do. It's not just about asking the questions it's about making the person feel  
34 comfortable and she did that with me (P6, female).  
35  
36

### 37 **3.5.2.3 Post-discharge phone call acceptability**

38  
39 Peer volunteers phoned participants once per day for the first three days following discharge,  
40 then once per week for the following six weeks. The phone calls were the most challenging component  
41 of this intervention as half of the participants lost their phones, changed their numbers, and/or did not  
42 answer at some point over the program's duration. Participants engaged well while on the phone,  
43 speaking with peer volunteers about their discharge goals, other issues in their lives, and how to  
44 improve their health and social engagement.  
45  
46

47 Some participants appreciated the flexibility of phone calls and felt they could engage with a  
48 peer volunteer in this manner, as one person said:  
49

50  
51 The way we were able to interact, communicate, understand. It was like he understood  
52 everything I was saying and I understood everything he was saying. And it was great. I couldn't  
53 imagine not having someone like him. Yes, because it made me think, how do I explain it, in the  
54 last few years, I've been stuck in a hole. Like it just flew, no one to talk to, not one to help,  
55  
56  
57  
58  
59  
60

1  
2  
3 nowhere to reach out, no nothing. When [Volunteer] came along it was like having a peer in a  
4 different type of background and culture (P9, male).  
5

6 Phone calls occasionally occurred at important times for participants, as shown in the following quote:  
7

8 A lot of the time I couldn't get in touch with my [in-person outpatient supports] but my peer  
9 would call me every week, she was a big help. I almost had a few relapses, but I didn't [relapse].  
10 Actually it was my peer, once I was about to use and she called me! It was so weird, but in a  
11 good way. I told her I really need this call right now (P13, female).  
12  
13

14 Other participants indicated that the phone calls felt impersonal and that in-person peer  
15 support was preferable, with a participant saying "I'm just not a phone person...I don't know, I just can't.  
16 It's easier [in-person], you don't really know somebody [over the phone]" (P1, female).  
17  
18

19 Figure 3 displays the Visual Analog Scale results from the PV call logs. PVs rated how each  
20 participant was doing individually, socially, interpersonally, and overall with 0 representing 'not well'  
21 and 10 representing 'excellent'. Overall, the most difficult period was 1-2 weeks post-discharge with  
22 participants improving by 5-6 weeks after leaving hospital. Participants who were lost to follow-up were  
23 rated lower than people who completed the program.  
24  
25

### 26 3.6 Harms

27 There were no reported study-related harms.  
28  
29

### 30 4.0 Discussion

31 The principal findings of this pilot are that: a) pre-discharge goal-setting and a peer volunteer  
32 meeting were feasible and acceptable for a sample of people living with HIV and complex needs; b)  
33 while some participants appreciated post-discharge phone calls, others experienced barriers to this  
34 method of engagement; and c) a clinical and a community-based HIV organization can partner for  
35 improved connection to care.  
36  
37  
38

39 Compared to other studies, a strength of this study was its substantial involvement of people  
40 living with HIV at multiple stages. This PPI approach may have made recruitment easier and contributed  
41 towards the positive experience that participants had with multiple intervention components [38].  
42 Another strength was this study's focus on people with complex needs; participants averaged eight  
43 comorbidities (e.g., AIDS, cancer, hepatitis C) and are commonly lost to follow-up from outpatient  
44 clinical care at CH, so the finding that 65% (n=11) connected with ACT services suggests that peer  
45 support can be a helpful catalyst in the discharge transition [20].  
46  
47  
48

49 For clinicians, this study presents two intervention components – pre-discharge goal setting and  
50 peer meeting – that can be feasibly incorporated into practice at low cost and time commitment which  
51 may ease the discharge transition for people experiencing complex medical and psychosocial needs. For  
52 policymakers, this study responds to a call for greater collaboration between clinical and community-  
53 based care [26] by highlighting how a hospital and a community agency can partner to provide peer  
54 support.  
55  
56  
57

1  
2  
3 The goal-setting and peer meeting intervention components need to be tested in a larger trial  
4 with greater rigour and a sufficient sample, using standardized measures, to properly ascertain their  
5 effectiveness. A larger study should consider results from other peer support trials, such as a null effect  
6 on antiretroviral adherence due to low-intensity (i.e., phone support) interventions [39] and significant  
7 results in adherence and care retention through home visits [40]. Future research on post-discharge  
8 peer support with a complex population group should therefore explore more intensive supports than  
9 weekly phone contact; in-person follow-up, whether meeting in social spaces (such as coffee shops),  
10 home visits, or outpatients returning to hospital for post-discharge peer groups could be combined with  
11 phone calls as more supportive methods of retaining people in care.  
12  
13  
14

#### 15 **4.1 Limitations**

16  
17 This study has several limitations. Without randomization and control and with a small sample,  
18 there remains uncertainty regarding the two promising intervention components (goal-setting and peer  
19 meeting). Other peer support studies have found significant effects in larger samples by focusing on a  
20 single issue of concern [19, 20]. A PPI limitation was the mixed results from the post-discharge phone  
21 calls. Phone support had been specifically requested from current and former CH clients living with HIV,  
22 during our consultations to design this study, as they perceived it to be a convenient and minimally  
23 disruptive way of accessing peer support. There is a risk of selection bias as eligible participants who  
24 were at risk of mortality were not approached [41]. Measurement error may have occurred as PVs rated  
25 their participants; they may have biased these assessments in an attempt to show positive change [42].  
26 Incomplete participation amongst a small sample requires that the results be interpreted with some  
27 caution.  
28  
29  
30  
31  
32

#### 33 **4.2 Applicability**

34  
35 The goal-setting and peer meeting components show preliminary promise for easing the  
36 discharge transition for people living with HIV and complex needs. These components could be more  
37 rigorously tested by other hospitals, where peers can be adequately trained and supported, to address  
38 high rates of lost-to-follow-up and eventual readmission for complex clients.  
39  
40

#### 41 **4.3 Interpretation**

42  
43 While there is some uncertainty regarding this study's benefits, a study of this nature does no  
44 harm. Peer support has been found effective on single issues regarding HIV (such as medication  
45 adherence); this study's attempt to pilot peer support regarding more complex needs is a first step  
46 towards better supporting the more marginalized people living with HIV who require more targeted  
47 support than is currently offered. The PPI approach helped facilitate study recruitment and the first two  
48 intervention components, yet the third component (post-discharge phone calls) received mixed results  
49 despite its PPI influence. Given this study's results and in-person peer support showing better outcomes  
50 than post-discharge phone calls in other quasi-experimental studies [43, 44], a future post-discharge  
51 peer support study could combine phone and in-person meetings. Multiple methods of engagement  
52 may be more acceptable to participants and contribute to greater completion rates, which could lead to  
53 better outcomes.  
54  
55  
56  
57  
58  
59  
60

## 5.0 Conclusion

This pilot study presents two intervention components (goal-setting and peer volunteer meeting) that have preliminary proof-of-concept in easing the discharge transition and connection to community-based care for people living with HIV and complex needs. More research is needed to determine the ideal form of post-discharge peer support for this population.

### Author contributions

**ADE** oversaw all study activities, supervised personnel, consented participants, led the analysis and interpretation of results, and wrote the first draft of the manuscript. **SCC** led patient engagement activities and co-led analysis and interpretation of results. **SLC** co-led analysis and interpretation of results and met monthly with ADE and SCC to discuss study progress. **ET** facilitated participant goal-setting and coordinated peer volunteer meetings and discharge timing. **JWM, DM, WW, LZ, and KB** contributed to study design and collected data. **GFG, GAW, and MM** prepared data for analysis through transcription and data entry. **AB** and **NB** trained peer volunteers with ADE. **CS** and **AS** contributed to study design and analysis. All the authors co-conceptualized the study, contributed to analysis, critically reviewed the manuscript, and approved the final submitted version of the manuscript.

### Competing interests

There are no competing interests for any author.

### Funding

This work was funded by the Ontario HIV Treatment Network (OHTN) through a Community-Based Research and Evaluation Grant (Grant number CBRG1074), with additional support from Universities Without Walls (UWW) and the Canadian Association for HIV Research (CAHR) through their Flipped Workshop mentoring program. ADE is supported by an Ontario Graduate Scholarship (OGS). SLC is a Canada Research Chair. The funders did not have a role in the design and conduct of the study, nor in the decision to submit the study for publication. This study was approved by the University of Toronto's HIV/AIDS Research Ethics Board (Protocol ID# 34124).

### Data sharing statement

Data not reported in this article (i.e., de-identified interview transcripts) may be available, pending consultation with the University of Toronto's HIV/AIDS Research Ethics Board (REB). Data requests may be sent to the principal investigator at [andrew.eaton@utoronto.ca](mailto:andrew.eaton@utoronto.ca), who will consult with the REB.

### Acknowledgements

We wish to thank all our study participants for their voluntary participation, and all of the people living with HIV who contributed to the study's design. Thank you to Dr. Sharon Walmsley for critically reviewing this manuscript and to Leah Szadkowski and Minnie Cui for assistance with the figures.



### Exclusive License

I, the Submitting Author has the right to grant and does grant on behalf of all authors of the Work (as defined in the below author licence), an exclusive licence and/or a non-exclusive licence for contributions from authors who are: i) UK Crown employees; ii) where BMJ has agreed a CC-BY licence shall apply, and/or iii) in accordance with the terms applicable for US Federal Government officers or employees acting as part of their official duties; on a worldwide, perpetual, irrevocable, royalty-free basis to BMJ Publishing Group Ltd (“BMJ”) its licensees and where the relevant Journal is co-owned by BMJ to the co-owners of the Journal, to publish the Work in BMJ Open and any other BMJ products and to exploit all rights, as set out in our [licence](#).

The Submitting Author accepts and understands that any supply made under these terms is made by BMJ to the Submitting Author unless you are acting as an employee on behalf of your employer or a postgraduate student of an affiliated institution which is paying any applicable article publishing charge (“APC”) for Open Access articles. Where the Submitting Author wishes to make the Work available on an Open Access basis (and intends to pay the relevant APC), the terms of reuse of such Open Access shall be governed by a Creative Commons licence – details of these licences and which [Creative Commons](#) licence will apply to this Work are set out in our licence referred to above.

## References

1. Allaudeen N, Vidyarthi A, Massell, J, Auerback A. Redefining readmission risk factors for general medicine patients. *J Hosp Med* 2011;6:54-60.
2. Kay ES, Batey DS, Mugavero MJ. The HIV treatment cascade and care continuum: Updates, goals, and recommendations for the future. *AIDS Res Ther* 2016;13:1-7. doi:10.1186/s12981-016-0120-0
3. Kimmel AD, Martin EG, Galadima H, et al. Clinical outcomes of HIV care delivery models in the US: A systematic review. *AIDS Care* 2016;28:1215-1222. doi:10.13039/100000060
4. Schaink AK, Kuluski K, Lyons RF, et al. A scoping review and thematic classification of patient complexity: Offering a unifying framework. *J Comorbid* 2012;2:1-9.
5. Grudniewicz A, Nelson M, Kuluski K, et al. Treatment goal setting for complex patients: Protocol for a scoping review. *BMJ Open* 2016;6(e011869). doi:10.1136/bmjopen-2016-011869
6. Omland LH, Ahlström MG, Obel N. Cohort profile update: The Danish HIV cohort study (DHCS). *Int J Epidemiol* 2014;43:1769-1769e. doi:10.1093/ije/dyu153
7. Hasse B, Ledergerder B, Furrer H, et al. Morbidity and aging in HIV-infected persons: The Swiss HIV cohort study. *Clin Infect Dis* 2011;53:1130-1139. doi:10.1093/cid/cir626
8. Bekele T, Globerman J, Watson J, et al. Prevalence and predictors of food insecurity among people living with HIV affiliated with AIDS service organizations in Ontario, Canada. *AIDS Care* 2018;30:663-671. doi:10.13039/501100000024
9. Halman M, Chan Carusone S, Stranks S, Schaefer-McDaniel N & Stewart A. Complex care needs of patients with late-stage HIV disease: A retrospective study. *AIDS Care* 2014;26:320-325. doi:10.1080/09540121.2013.819404
10. Rueda S, Law S, & Rourke SB. Psychosocial, mental health, and behavioral issues of aging with HIV. *Curr Opin HIV/AIDS* 2014;9:325-331. doi:10.1097/COH.000000000000071
11. Szadkowski L, Walmsley S, Burchell AN, et al. High retention in HIV care at a tertiary care centre in Toronto, Canada. *AIDS Care* 2017;30:246-254.
12. Babatunde E, Medha I, Helmut A, Weissman, S. The South Carolina HIV cascade of care. *South Med J* 2015;108:670-674. doi:10.14423/SMJ.0000000000000368

- 1  
2  
3 13. Powers KA, Miller WC. Critical review: Building on the HIV cascade. *JAIDS* 2015;69:341-347.doi:  
4 10.1097/QAI.0000000000000611  
5  
6
- 7 14. Bruton J, Rai T, Day S, Ward H. Patient perspectives on the HIV continuum of care in London: A  
8 qualitative study of people diagnosed between 1986 and 2014. *BMJ Open* 2018;8(e0202208).  
9 doi:10.1136/bmjopen-2017-020208  
10  
11
- 12 15. Rachlis B, Burchell AN, Gardner S, et al. Social determinants of health and retention in HIV care  
13 in a clinical cohort in Ontario, Canada. *AIDS Care* 2016;29:828-837.  
14 doi:10.1080/09540121.2016.1271389  
15  
16
- 17 16. Cohen MS, Chen YQ, McCauley M, et al. Antiretroviral therapy for the prevention of HIV-1  
18 transmission. *N Engl J M* 2016;375:830-839. doi:10.1056/NEJMoa1600693  
19  
20
- 21 17. Rodger AJ, Cambiano V, Brunn T, et al. Sexual activity without condoms and risk of HIV  
22 transmission in serodifferent couples when the HIV-positive partner is using suppressive  
23 antiretroviral therapy. *JAMA* 2016;316:171-181. doi:10.1001/jama.2016.5148  
24  
25
- 26 18. Chan Carusone S, O'Leary B, McWatt S, Stewart A, Craig S, Brennan DJ. The lived experience of  
27 the hospital discharge "plan": A longitudinal qualitative study of complex patients. *J Hosp Med*  
28 2017;12:5-10.  
29  
30
- 31 19. Genberg BL, Shangani S, Sabatino K, et al. (2016). Improving engagement in the HIV care  
32 cascade: A systematic review of interventions involving people living with HIV/AIDS as peers.  
33 *AIDS Behav* 2016;20:2452. ISSN:1090-7165  
34  
35
- 36 20. Simoni JM, Nelson KM, Franks JC, Yard SS, Lehavot K. Are peer interventions for HIV efficacious?  
37 A systematic review. *AIDS and Behavior* 2011;15:1589-1595. ISSN:1090-7165  
38  
39
- 40 21. Shangani S, Escudero D, Kirwa K, Harrison, A, Marshall B, Operario D. Effectiveness of peer-led  
41 interventions to increase HIV testing among men who have sex with men: A systematic review  
42 and meta-analysis. *AIDS Care* 2017;29:1003-1011. ISSN:0954-0121  
43  
44
- 45 22. Eaton AD, Tsang AKT, Craig SL, Ginocchio, GF. Peer researchers in post-professional healthcare:  
46 A glimpse at motivations and partial objectivity as opportunities for action researchers. *Action*  
47 *Res J* 2018. doi:10.1177/14776750318811913  
48  
49
- 50 23. Kerrigan DL, Fonner VA, Stromdahl S, Kennedy, CE. Community empowerment among female  
51 sex workers is an effective HIV prevention intervention: A systematic review of the peer-  
52 reviewed evidence from low and middle-income countries. *AIDS Behav* 2013;17:1926-1940.  
53 ISSN:1090-7165  
54  
55  
56  
57  
58  
59  
60

- 1  
2  
3 24. Maticka-Tyndale E, Barnett JP. Peer-led interventions to reduce HIV risk of youth: A review.  
4 *Evalu Program Plann* 2010;33(2):98.  
5  
6  
7 25. Medley A, Kennedy C, O'Reilly K, Sweat M. Effectiveness of peer education interventions for HIV  
8 prevention in developing countries: A systematic review and meta-analysis. *AIDS Educ Prev*  
9 2009;21:181-206. ISSN:0899-9546  
10  
11  
12 26. Bacon J, the Ontario Advisory Committee on HIV/AIDS. HIV/AIDS strategy to 2026: Focusing our  
13 efforts – changing the course of the HIV prevention, engagement and care cascade in Ontario.  
14 *Ministry of Health and Long Term Care* 2016.  
15 [http://www.health.gov.on.ca/en/pro/programs/hivaids/docs/oach\\_strategy\\_2026.pdf](http://www.health.gov.on.ca/en/pro/programs/hivaids/docs/oach_strategy_2026.pdf)  
16  
17  
18 27. UNAIDS. Communities deliver: The critical role of communities in reaching global targets to end  
19 the AIDS epidemic. *UNAIDS* 2015.  
20 [http://www.unaids.org/sites/default/files/media\\_asset/UNAIDS\\_JC2725\\_CommunitiesDeliver\\_e](http://www.unaids.org/sites/default/files/media_asset/UNAIDS_JC2725_CommunitiesDeliver_en.pdf)  
21 [n.pdf](http://www.unaids.org/sites/default/files/media_asset/UNAIDS_JC2725_CommunitiesDeliver_en.pdf)  
22  
23  
24 28. Israel BA, Coombe CM, Cheezum RR, et al. Community-based participatory research: A capacity-  
25 building approach for policy advocacy aimed at eliminating health disparities. *Am J Public Health*  
26 2011;100:2094-2102. doi:10.2105/AJPH.2009.170506  
27  
28  
29 29. May C. We need minimally disruptive medicine. *BMJ* 2009;339(b2803). doi:10.1136/bmj.b2803  
30  
31  
32 30. Eaton AD, Ibáñez-Carrasco F, Craig SL, et al. (2018). A blended learning curriculum for training  
33 peer researchers to conduct community-based participatory research. *Action Learn Res Pract*  
34 2018;15:139-150. doi:10.1080/14767333.2018.1462143  
35  
36  
37 31. Eaton AD. (in press). Filmed simulation to train peer researchers in community-based  
38 participatory research. *Soc Work Res*.  
39  
40  
41 32. Hettema J, Steele J, Miller WR. Motivational interviewing. *Annu Rev Clin Psychol* 2005;1:91-111.  
42 doi:1146/annurev.clinpsy.1.102803.143833  
43  
44  
45 33. Campbell A, Hemsley S. (2009). Outcome rating scale and session rating scale in psychological  
46 practice: Clinical utility of ultra-brief measures. *Clin Psychol* 2009;13:1-9.  
47 doi:10.1080/13284200802676391  
48  
49  
50 34. Imes CC, Dougherty CM, Lewis FM, Ausain MA. Outcomes of a pilot intervention study for young  
51 adults at risk of cardiovascular disease based on their family history. *J Cardiovasc Nurs*  
52 2016;31(5);433-440. doi:10.1097/JCN.000000000000261  
53  
54  
55  
56  
57  
58  
59  
60

- 1  
2  
3 35. Pettifor A, Mac Phail CL, Nguyen N, et al. Feasibility and acceptability of project connect: A  
4 couples-based HIV-risk reduction intervention among young couples in Johannesburg, South  
5 Africa. *AIDS Care* 2014;26(4);476-482. doi:10.1080/09540121.2013.841827  
6  
7  
8 36. Pérez-Jiménez D, Orengo-Aguayo RE. Qualitative analysis on an educational intervention with  
9 HIV-discordant heterosexual Latino couples. *P R Health Sci J* 2011;30(4);188-194.  
10 PMID:22263299  
11  
12  
13 37. Bengtsson M. How to plan and perform a qualitative study using content analysis. *NursingPlus*  
14 *Open* 2016;2;8-14. doi:10.1016/j.npls.2016.01.001  
15  
16  
17 38. Eaton AD, Cattaneo JS, Watchorn JM, et al. From serodiscordant to magnetic: The feasibility and  
18 acceptability of a pilot psychoeducational group intervention designed to improve relationship  
19 quality. *Soc Work with Groups* 2017;41:323-335. doi:10.1080/01609513.2017.1369922  
20  
21  
22 39. Simoni JM, Pantalone DW, Plummer MD, Huang B. A randomized controlled trial of a peer  
23 support intervention targeting antiretroviral medication adherence and depressive  
24 symptomatology in HIV-positive men and women. *Health Psychol* 2014; 26(4);488-495.  
25 doi:10.1037/0278-6133.26.4.488  
26  
27  
28 40. Chang LW, Nakigozi G, Billioux VG, et al. Effectiveness of peer support on care engagement and  
29 preventive care intervention utilization among pre-antiretroviral therapy, HIV-infected adults in  
30 Rakai, Uganda: A randomized trial. *AIDS Behav* 2015;19(10);1742-1751. doi:10.1007/s10461-  
31 015-1159-y  
32  
33  
34 41. Henderson M, Page L. Appraising the evidence: What is selection bias? *Evidence-Based Ment*  
35 *Health* 2007;10:67-68.  
36  
37  
38 42. Page LA, Henderson M. Appraising the evidence: What is measurement bias? *Evidence-Based*  
39 *Ment Health* 2008;11(2);36-37. doi: 10.1136/ebmh.11.2.36  
40  
41  
42 43. Mash R, Mash RJ. A quasi-experimental evaluation of an HIV prevention programme by peer  
43 education in the Anglican church of the Western Cape, South Africa. *BMJ Open*  
44 2012;2(3000638). doi:10.1136/bmjopen-2011-000638  
45  
46  
47 44. Harper GW, Bangi AK, Sanchez B, Doll M, Pedraza A. A quasi-experimental evaluation of a  
48 community-based HIV prevention intervention for Mexican American female adolescents: The  
49 Shero's program. *AIDS Educ Prev* 2009;21:109-123.  
50  
51  
52  
53  
54  
55  
56  
57  
58  
59  
60

1  
2  
3 **Figure Legend**  
4

5 Figure 1: Participant flowchart  
6

7 Figure 2: Participant goals: Self-rated importance and confidence  
8

9 Figure 3: Peer volunteer assessment of participants following each call  
10  
11  
12  
13  
14  
15  
16  
17  
18  
19  
20  
21  
22  
23  
24  
25  
26  
27  
28  
29  
30  
31  
32  
33  
34  
35  
36  
37  
38  
39  
40  
41  
42  
43  
44  
45  
46  
47  
48  
49  
50  
51  
52  
53  
54  
55  
56  
57  
58  
59  
60

For peer review only

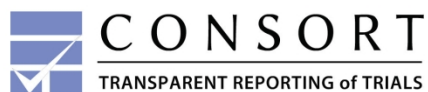

Figure 1: Participant flowchart

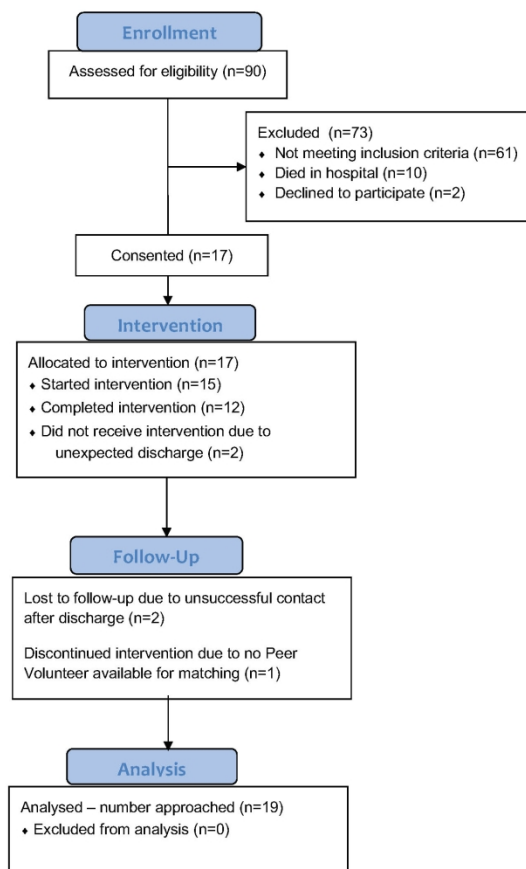

Figure 1: Participant flowchart

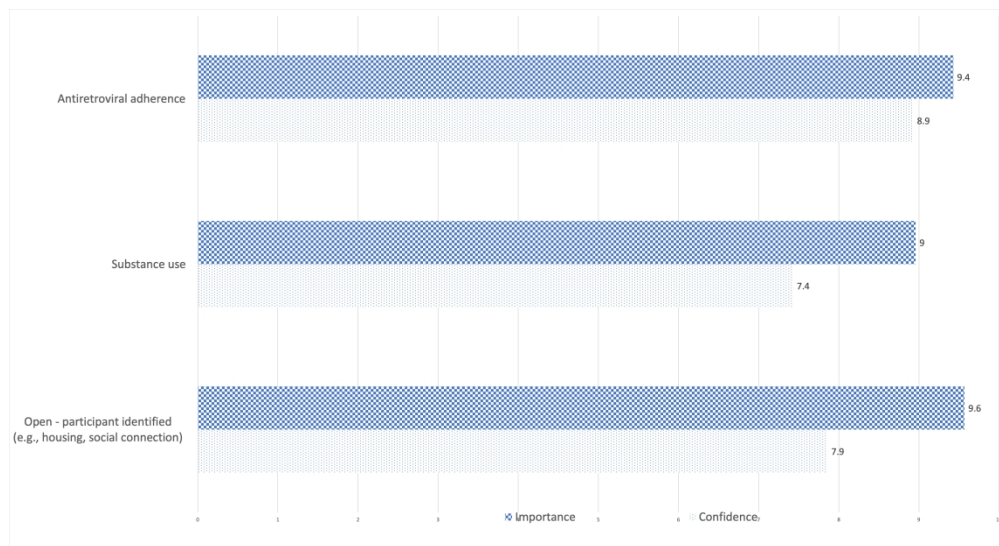

Figure 2: Participant goals: Self-rated importance and confidence

275x149mm (300 x 300 DPI)



1  
2  
3  
4  
5  
6  
7  
8  
9  
10  
11  
12  
13  
14  
15  
16  
17  
18  
19  
20  
21  
22  
23  
24  
25  
26  
27  
28  
29  
30  
31  
32  
33  
34  
35  
36  
37  
38  
39  
40  
41  
42  
43  
44  
45  
46  
47  
48  
49  
50  
51  
52  
53  
54  
55  
56  
57  
58  
59  
60

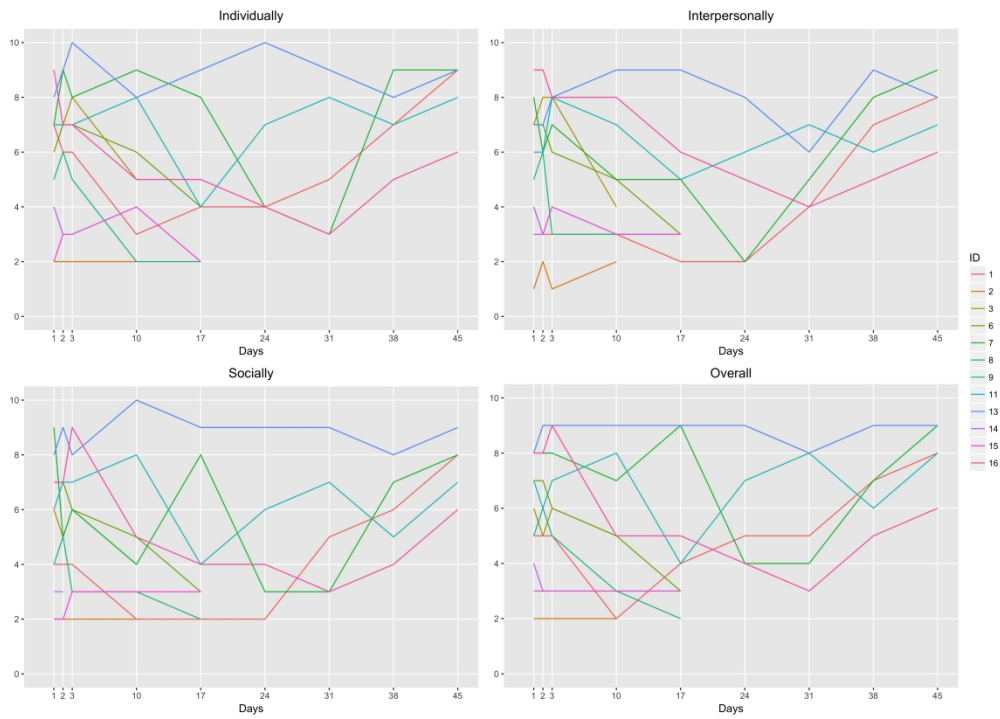

Figure 3: Peer volunteer assessment of participants following each call

**ART of Conversation – Community Transition Planning Forms (CTP)**

*Community transition change plan*

|                                                                                                                                     |                                                                                               |
|-------------------------------------------------------------------------------------------------------------------------------------|-----------------------------------------------------------------------------------------------|
| Goal #1: <b>HIV Medications</b><br>(Note: A CTP form is completed for each area identified by participant)                          |                                                                                               |
| <i>The change I want to make (or continue making) is:</i>                                                                           |                                                                                               |
| <i>Some barriers or difficulties that may get in the way are:</i>                                                                   |                                                                                               |
| <i>The steps I plan to take in making this change are:</i>                                                                          |                                                                                               |
| <i>The person/agency/organization that can support me in making this change is:</i><br>Name:<br>Contact info:<br>How can they help: |                                                                                               |
| <i>How important is it to you to make this change?<br/>                 (1-10 scale)</i>                                            | <i>How confident are you that you can make this<br/>                 change? (1-10 scale)</i> |

*Support people/agency/organization*

| Name                                                                          | Role                            | Contact info.  |
|-------------------------------------------------------------------------------|---------------------------------|----------------|
| i.e. Chris Smith                                                              | A friend who helps walk my cat. | (416) 962-7600 |
| (Names the person puts forward while in the mind set of discharge transition) |                                 |                |
|                                                                               |                                 |                |
|                                                                               |                                 |                |

*Significant dates/appointments/events following discharge*

| Date                     | Details                                                                                                                            |
|--------------------------|------------------------------------------------------------------------------------------------------------------------------------|
| i.e. Jan 1 <sup>st</sup> | My partners birthday                                                                                                               |
|                          | (Some significant dates will be in the chart/discharge summary but this completed box can venture beyond medical appts./referrals) |
|                          |                                                                                                                                    |
|                          |                                                                                                                                    |

*Community transition change plan*

|                                                                                                                              |                                                                   |
|------------------------------------------------------------------------------------------------------------------------------|-------------------------------------------------------------------|
| Goal #2: <b>Substance Use</b><br>(Note: A CTP form is completed for each area identified by participant)                     |                                                                   |
| The change I want to make (or continue making) is:                                                                           |                                                                   |
| Some barriers or difficulties that may get in the way are:                                                                   |                                                                   |
| The steps I plan to take in making this change are:                                                                          |                                                                   |
| The person/agency/organization that can support me in making this change is:<br>Name:<br>Contact info:<br>How can they help: |                                                                   |
| How important is it to you to make this change?<br>(1-10 scale)                                                              | How confident are you that you can make this change? (1-10 scale) |

*Support people/agency/organization*

| Name                                                                          | Role                            | Contact info.  |
|-------------------------------------------------------------------------------|---------------------------------|----------------|
| i.e. Chris Smith                                                              | A friend who helps walk my cat. | (416) 962-7600 |
| (Names the person puts forward while in the mind set of discharge transition) |                                 |                |
|                                                                               |                                 |                |
|                                                                               |                                 |                |

*Significant dates/appointments/events following discharge*

| Date                     | Details                                                                                                                            |
|--------------------------|------------------------------------------------------------------------------------------------------------------------------------|
| i.e. Jan 1 <sup>st</sup> | My partners birthday                                                                                                               |
|                          | (Some significant dates will be in the chart/discharge summary but this completed box can venture beyond medical appts./referrals) |
|                          |                                                                                                                                    |
|                          |                                                                                                                                    |

Community transition change plan

|                                                                                                                              |                                                                   |
|------------------------------------------------------------------------------------------------------------------------------|-------------------------------------------------------------------|
| Goal #3: <b>Open - client-identified</b><br>(Note: A CTP form is completed for each area identified by participant)          |                                                                   |
| The change I want to make (or continue making) is:                                                                           |                                                                   |
| Some barriers or difficulties that may get in the way are:                                                                   |                                                                   |
| The steps I plan to take in making this change are:                                                                          |                                                                   |
| The person/agency/organization that can support me in making this change is:<br>Name:<br>Contact info:<br>How can they help: |                                                                   |
| How important is it to you to make this change?<br>(1-10 scale)                                                              | How confident are you that you can make this change? (1-10 scale) |

Support people/agency/organization

| Name                                                                          | Role                            | Contact info.  |
|-------------------------------------------------------------------------------|---------------------------------|----------------|
| i.e. Chris Smith                                                              | A friend who helps walk my cat. | (416) 962-7600 |
| (Names the person puts forward while in the mind set of discharge transition) |                                 |                |
|                                                                               |                                 |                |
|                                                                               |                                 |                |

Significant dates/appointments/events following discharge

| Date                     | Details                                                                                                                            |
|--------------------------|------------------------------------------------------------------------------------------------------------------------------------|
| i.e. Jan 1 <sup>st</sup> | My partners birthday                                                                                                               |
|                          | (Some significant dates will be in the chart/discharge summary but this completed box can venture beyond medical appts./referrals) |
|                          |                                                                                                                                    |
|                          |                                                                                                                                    |

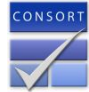

## CONSORT 2010 checklist of information to include when reporting a pilot or feasibility trial\*

| Section/Topic                    | Item No | Checklist item                                                                                                                                                                              | Reported on page No |
|----------------------------------|---------|---------------------------------------------------------------------------------------------------------------------------------------------------------------------------------------------|---------------------|
| <b>Title and abstract</b>        |         |                                                                                                                                                                                             |                     |
|                                  | 1a      | Identification as a pilot or feasibility randomised trial in the title                                                                                                                      | 1                   |
|                                  | 1b      | Structured summary of pilot trial design, methods, results, and conclusions (for specific guidance see CONSORT abstract extension for pilot trials)                                         | 2                   |
| <b>Introduction</b>              |         |                                                                                                                                                                                             |                     |
| Background and objectives        | 2a      | Scientific background and explanation of rationale for future definitive trial, and reasons for randomised pilot trial                                                                      | 4-5                 |
|                                  | 2b      | Specific objectives or research questions for pilot trial                                                                                                                                   | 5                   |
| <b>Methods</b>                   |         |                                                                                                                                                                                             |                     |
| Trial design                     | 3a      | Description of pilot trial design (such as parallel, factorial) including allocation ratio                                                                                                  | 5                   |
|                                  | 3b      | Important changes to methods after pilot trial commencement (such as eligibility criteria), with reasons                                                                                    | N/A                 |
| Participants                     | 4a      | Eligibility criteria for participants                                                                                                                                                       | 6                   |
|                                  | 4b      | Settings and locations where the data were collected                                                                                                                                        | 6                   |
|                                  | 4c      | How participants were identified and consented                                                                                                                                              | 6-7                 |
| Interventions                    | 5       | The interventions for each group with sufficient details to allow replication, including how and when they were actually administered                                                       | 7                   |
| Outcomes                         | 6a      | Completely defined prespecified assessments or measurements to address each pilot trial objective specified in 2b, including how and when they were assessed                                | 8-9, Table 1        |
|                                  | 6b      | Any changes to pilot trial assessments or measurements after the pilot trial commenced, with reasons                                                                                        | N/A                 |
|                                  | 6c      | If applicable, prespecified criteria used to judge whether, or how, to proceed with future definitive trial                                                                                 | N/A                 |
| Sample size                      | 7a      | Rationale for numbers in the pilot trial                                                                                                                                                    | 9                   |
|                                  | 7b      | When applicable, explanation of any interim analyses and stopping guidelines                                                                                                                | N/A                 |
| Randomisation:                   |         |                                                                                                                                                                                             |                     |
| Sequence generation              | 8a      | Method used to generate the random allocation sequence                                                                                                                                      | N/A                 |
|                                  | 8b      | Type of randomisation(s); details of any restriction (such as blocking and block size)                                                                                                      | N/A                 |
| Allocation concealment mechanism | 9       | Mechanism used to implement the random allocation sequence (such as sequentially numbered containers), describing any steps taken to conceal the sequence until interventions were assigned | N/A                 |

|                                                      |     |                                                                                                                                                                                       |             |
|------------------------------------------------------|-----|---------------------------------------------------------------------------------------------------------------------------------------------------------------------------------------|-------------|
| Implementation                                       | 10  | Who generated the random allocation sequence, who enrolled participants, and who assigned participants to interventions                                                               | N/A         |
| Blinding                                             | 11a | If done, who was blinded after assignment to interventions (for example, participants, care providers, those assessing outcomes) and how                                              | N/A         |
|                                                      | 11b | If relevant, description of the similarity of interventions                                                                                                                           | N/A         |
| Statistical methods                                  | 12  | Methods used to address each pilot trial objective whether qualitative or quantitative                                                                                                | 9           |
| <b>Results</b>                                       |     |                                                                                                                                                                                       |             |
| Participant flow (a diagram is strongly recommended) | 13a | For each group, the numbers of participants who were approached and/or assessed for eligibility, randomly assigned, received intended treatment, and were assessed for each objective | 9, Figure 1 |
|                                                      | 13b | For each group, losses and exclusions after randomisation, together with reasons                                                                                                      | 9, Figure 1 |
| Recruitment                                          | 14a | Dates defining the periods of recruitment and follow-up                                                                                                                               | 9           |
|                                                      | 14b | Why the pilot trial ended or was stopped                                                                                                                                              | 9           |
| Baseline data                                        | 15  | A table showing baseline demographic and clinical characteristics for each group                                                                                                      | 10, Table 2 |
| Numbers analysed                                     | 16  | For each objective, number of participants (denominator) included in each analysis. If relevant, these numbers should be by randomised group                                          | 11          |
| Outcomes and estimation                              | 17  | For each objective, results including expressions of uncertainty (such as 95% confidence interval) for any estimates. If relevant, these results should be by randomised group        | 11-14       |
| Ancillary analyses                                   | 18  | Results of any other analyses performed that could be used to inform the future definitive trial                                                                                      | N/A         |
| Harms                                                | 19  | All important harms or unintended effects in each group (for specific guidance see CONSORT for harms)                                                                                 | 14          |
|                                                      | 19a | If relevant, other important unintended consequences                                                                                                                                  | N/A         |
| <b>Discussion</b>                                    |     |                                                                                                                                                                                       |             |
| Limitations                                          | 20  | Pilot trial limitations, addressing sources of potential bias and remaining uncertainty about feasibility                                                                             | 15          |
| Generalisability                                     | 21  | Generalisability (applicability) of pilot trial methods and findings to future definitive trial and other studies                                                                     | 15          |
| Interpretation                                       | 22  | Interpretation consistent with pilot trial objectives and findings, balancing potential benefits and harms, and considering other relevant evidence                                   | 15          |
|                                                      | 22a | Implications for progression from pilot to future definitive trial, including any proposed amendments                                                                                 | 15          |
| <b>Other information</b>                             |     |                                                                                                                                                                                       |             |
| Registration                                         | 23  | Registration number for pilot trial and name of trial registry                                                                                                                        | N/A         |
| Protocol                                             | 24  | Where the pilot trial protocol can be accessed, if available                                                                                                                          | N/A         |
| Funding                                              | 25  | Sources of funding and other support (such as supply of drugs), role of funders                                                                                                       | 16          |
|                                                      | 26  | Ethical approval or approval by research review committee, confirmed with reference number                                                                                            | 16          |

Citation: Eldridge SM, Chan CL, Campbell MJ, Bond CM, Hopewell S, Thabane L, et al. CONSORT 2010 statement: extension to randomised pilot and feasibility trials. BMJ. 2016;355.

\*We strongly recommend reading this statement in conjunction with the CONSORT 2010, extension to randomised pilot and feasibility trials, Explanation and Elaboration for important clarifications on all the items. If relevant, we also recommend reading CONSORT extensions for cluster randomised trials, non-inferiority and equivalence trials, non-pharmacological treatments, herbal interventions, and pragmatic trials. Additional extensions are forthcoming: for those and for up to date references relevant to this checklist, see [www.consort-statement.org](http://www.consort-statement.org).

For peer review only

1  
2  
3  
4  
5  
6  
7  
8  
9  
10  
11  
12  
13  
14  
15  
16  
17  
18  
19  
20  
21  
22  
23  
24  
25  
26  
27  
28  
29  
30  
31  
32  
33  
34  
35  
36  
37  
38  
39  
40  
41  
42  
43  
44  
45  
46

## Guidance for Reporting Involvement of Patients and the Public 2 – Short Form (GRIPP2-SF)

| Section and topic                   | Item                                                                                                                                      | Reported on page No. |
|-------------------------------------|-------------------------------------------------------------------------------------------------------------------------------------------|----------------------|
| 1: Aim                              | Report the aim of PPI in the study                                                                                                        | 4                    |
| 2: Methods                          | Provide a clear description of the methods used for PPI in the study                                                                      | 5-6                  |
| 3: Study results                    | Outcomes—Report the results of PPI in the study, including both positive and negative outcomes                                            | 11-12                |
| 4: Discussion and conclusions       | Outcomes—Comment on the extent to which PPI influenced the study overall. Describe positive and negative effects                          | 14                   |
| 5: Reflections/critical perspective | Comment critically on the study, reflecting on the things that went well and those that did not, so others can learn from this experience | 15                   |



# BMJ Open

## The ART of conversation: Feasibility and acceptability of a pilot peer intervention to help complex HIV-positive people transition from hospital to community

|                                 |                                                                                                                                                                                                                                                                                                                                                                                                                                                                                                                                                                                                                                                                                                                                                                                                                                                                                                                                        |
|---------------------------------|----------------------------------------------------------------------------------------------------------------------------------------------------------------------------------------------------------------------------------------------------------------------------------------------------------------------------------------------------------------------------------------------------------------------------------------------------------------------------------------------------------------------------------------------------------------------------------------------------------------------------------------------------------------------------------------------------------------------------------------------------------------------------------------------------------------------------------------------------------------------------------------------------------------------------------------|
| Journal:                        | <i>BMJ Open</i>                                                                                                                                                                                                                                                                                                                                                                                                                                                                                                                                                                                                                                                                                                                                                                                                                                                                                                                        |
| Manuscript ID                   | bmjopen-2018-026674.R2                                                                                                                                                                                                                                                                                                                                                                                                                                                                                                                                                                                                                                                                                                                                                                                                                                                                                                                 |
| Article Type:                   | Research                                                                                                                                                                                                                                                                                                                                                                                                                                                                                                                                                                                                                                                                                                                                                                                                                                                                                                                               |
| Date Submitted by the Author:   | 06-Feb-2019                                                                                                                                                                                                                                                                                                                                                                                                                                                                                                                                                                                                                                                                                                                                                                                                                                                                                                                            |
| Complete List of Authors:       | Eaton, Andrew; University of Toronto, Factor-Inwentash Faculty of Social Work; AIDS Committee of Toronto<br>Chan Carusone, Soo; Casey House; McMaster University, Department of Health Research Methods, Evidence, and Impact<br>Craig, Shelley; University of Toronto, Factor-Inwentash Faculty of Social Work<br>Telegdi, Erin; Casey House<br>McCullagh, John; AIDS Committee of Toronto<br>McClure, David; AIDS Committee of Toronto<br>Wilson, Walter; AIDS Committee of Toronto<br>Zuniga, Leonardo; AIDS Committee of Toronto<br>Berney, Kevin; AIDS Committee of Toronto<br>Ginocchio, Galo; AIDS Committee of Toronto<br>Wells, Gordon; AIDS Committee of Toronto<br>Montess, Michael; AIDS Committee of Toronto<br>Busch, Adam; AIDS Committee of Toronto<br>Boyce, Nick; Ontario Harm Reduction Network<br>Strike, Carol; University of Toronto, Dalla Lana School of Public Health<br>Stewart, Ann; St. Michael's Hospital |
| <b>Primary Subject Heading</b>: | HIV/AIDS                                                                                                                                                                                                                                                                                                                                                                                                                                                                                                                                                                                                                                                                                                                                                                                                                                                                                                                               |
| Secondary Subject Heading:      | Addiction, Qualitative research                                                                                                                                                                                                                                                                                                                                                                                                                                                                                                                                                                                                                                                                                                                                                                                                                                                                                                        |
| Keywords:                       | HIV & AIDS < INFECTIOUS DISEASES, Substance misuse < PSYCHIATRY, QUALITATIVE RESEARCH, SOCIAL MEDICINE                                                                                                                                                                                                                                                                                                                                                                                                                                                                                                                                                                                                                                                                                                                                                                                                                                 |
|                                 |                                                                                                                                                                                                                                                                                                                                                                                                                                                                                                                                                                                                                                                                                                                                                                                                                                                                                                                                        |

SCHOLARONE™  
Manuscripts

1  
2  
3 **The ART of conversation: Feasibility and acceptability of a pilot peer intervention to help complex HIV-**  
4 **positive people transition from hospital to community**  
5

6 Andrew D. Eaton<sup>1,2\*</sup>, Soo Chan Carusone<sup>3,4</sup>, Shelley L. Craig<sup>1</sup>, Erin Telegdi<sup>3</sup>, John W. McCullagh<sup>2</sup>, David  
7 McClure<sup>2</sup>, Walter Wilson<sup>2</sup>, Leonardo Zuniga<sup>2</sup>, Kevin Berney<sup>2</sup>, Galo F. Ginocchio<sup>2</sup>, Gordon A. Wells<sup>2</sup>,  
8 Michael Montess<sup>2</sup>, Adam Busch<sup>2</sup>, Nick Boyce<sup>5</sup>, Carol Strike<sup>6</sup>, Ann Stewart<sup>3,7</sup>  
9  
10

11 <sup>1</sup>Factor-Inwentash Faculty of Social Work, University of Toronto; Toronto, ON, Canada  
12

13 <sup>2</sup>AIDS Committee of Toronto (ACT); Toronto, ON, Canada  
14

15 <sup>3</sup>Casey House (CH); Toronto, ON, Canada  
16

17 <sup>4</sup>Department of Health Research Methods, Evidence, and Impact; Hamilton, ON, Canada  
18

19 <sup>5</sup>Ontario Harm Reduction Network; Toronto, ON, Canada  
20

21 <sup>6</sup>Dalla Lana School of Public Health, University of Toronto; Toronto, ON, Canada  
22

23 <sup>7</sup>St. Michael's Hospital; Toronto, ON, Canada  
24

25  
26 \*Corresponding author. Factor-Inwentash Faculty of Social Work, University of Toronto. 246 Bloor St.  
27 W., Toronto, ON, Canada, M5S1V4 Phone: +1-416-978-8895. Email: [andrew.eaton@utoronto.ca](mailto:andrew.eaton@utoronto.ca).  
28

29 **Word count: 4,898**  
30  
31  
32  
33  
34  
35  
36  
37  
38  
39  
40  
41  
42  
43  
44  
45  
46  
47  
48  
49  
50  
51  
52  
53  
54  
55  
56  
57  
58  
59  
60

## Abstract

**Objectives:** To pilot a peer-based intervention for people living with HIV who used substances, had challenges with antiretroviral adherence, and would be discharged from hospital to community.

**Study design:** A community-based, quasi-experimental pilot intervention study designed to assess feasibility, acceptability, and connection to a community-based HIV organization.

**Setting:** This study was conducted in Toronto, Canada at Casey House (CH; hospital for people living with HIV) in collaboration with the AIDS Committee of Toronto (ACT; community-based HIV organization).

**Participants:** People living with HIV who were: CH inpatient between 01/04/2017 and 31/3/2018; struggled with antiretroviral adherence; actively used substances; and would be discharged to community were eligible. Forty people met criteria, 19 were approached by an inpatient nurse and 17 consented. Average age was 48.8 (SD=11.4), 58.8% were male, and participants averaged 7.8 physical and mental health comorbidities (SD=3.1).

**Intervention:** Titled *The ART of Conversation*, the three-pronged personalized intervention was developed through input from CH clients and ACT volunteers, all living with HIV. Intervention components were: a) pre-discharge goal-setting (adherence, substance use, self-identified goal) with the study nurse; b) pre-discharge meeting with an HIV+ peer volunteer (PV); and c) nine post-discharge phone calls between PV and participant, once/day for three days then once/week for six weeks.

**Primary Outcomes:** Feasibility was measured through proportion of eligible participants recruited and PV availability. Acceptability was assessed through participant interviews at three times (pre-intervention, post-intervention, 6-week follow-up) and through PV call logs. Client records determined connection to ACT within the study timeframe.

**Results:** Twelve participants completed the intervention and nine connected with ACT. Pre-discharge goal-setting and PV meeting were both feasible and acceptable. Post-discharge phone calls were a challenge as half of completers missed at least one call.

**Conclusions:** Although pre-discharge goal-setting and PV meeting were feasible, methods to maintain connection following discharge require further investigation.

## Keywords

HIV & AIDS; Substance misuse; Social medicine; Qualitative research

### Strengths and limitations of this study

- Patient and public involvement was prioritized throughout this study as people living with HIV co-designed the study and intervention, delivered the intervention, and collected and analyzed data.
- Peer support models have been identified as a priority area by policymakers to improve care transitions for people living with HIV.
- Interventions for a study population with severe medical and psychosocial complexity who are at high-risk of poor health outcomes need to be tested for feasibility and acceptability before launching a larger scale study.
- The key limitations are: the lack of a control group and randomization, which were not possible within our recruitment timeline and sampling frame; a potentially biased sample, as not all eligible participants were approached; and incomplete participation, as half of participants missed at least one post-discharge phone call.

## 1.0 Introduction

Hospital discharge can result in discontinuity of care, non-adherence to medications, and other negative outcomes [1], especially for people living with HIV [2, 3] who face complex medical and psychosocial challenges [4]. Medical and psychosocial complexity is multiple, overlapping issues that affect a person's health [5]. People living with HIV may experience complex medical issues (e.g., frequent hospitalizations, poor medication adherence, polypharmacy, concurrent comorbidities, etc.) [6, 7]. Psychosocial factors may overlap with health challenges, (e.g., increased substance use, homelessness, unemployment, social isolation, food insecurity, etc.) [8, 9, 10]. These complex difficulties can interrupt the cascade of care and increase the risk of mortality [1]; in particular, substance use is a priority area of focus for care retention interventions [11].

The cascade of care (i.e., HIV treatment cascade or the HIV care continuum) is a framework recommended by UNAIDS for member countries to measure their progress in ending the AIDS epidemic [2]. Individual countries, and individual states and provinces within those countries, have adapted this continuum to fit their local contexts [12, 13] and consulted patients in its local implementation [14, 15]. However, a common end-point is universal amongst these frameworks: retention in care (i.e., attending regular medical appointments, accessing community supports) and maintaining viral suppression (<50 copies of HIV per millilitre of blood, meaning that people living with HIV cannot sexually transmit the virus) [16, 17]. Complex clients living with HIV are often hospitalized to re-adhere to medications and progress on the care cascade; however, the discharge transition can cause cascade regression and poor health outcomes [18]. 'Peer' interventions, provided by trained community members who share lived experience with clients, may be a helpful and cost-effective complement to outpatient clinical care in order to help people living with HIV maintain the health progress that they achieved in hospital [19, 20].

Meaningful involvement of people living with HIV as peers has been central throughout the history of HIV and AIDS [20, 21]. From the first cases of AIDS to the present day, people living with and affected by HIV have been forming community-based agencies and implementing peer-based models of care [21, 22]. Yet peer models are understudied amongst people living with both HIV and complex issues; most work focuses on prevention in the HIV-negative population [21, 23, 24, 25] or a single issue (most commonly, medication adherence) in the HIV-positive population [19, 20]. Peer interventions that address the more complex realities that some people living with HIV experience are recommended in policy, especially ones that improve linkages between clinical and community-based care [26, 27].

To design a peer intervention that could help people living with both HIV and complex issues in the transition from hospital to community, we used the theories of Community-Based Participatory Research (CBPR) and Minimally Disruptive Medicine (MDM). CBPR recommends the equitable involvement of the client population in the design and conduct of a study [28], which aligns with this study's aim to pilot a peer intervention. MDM suggests that new interventions may have better results when designed to fit within the context of people's lives [29]. In this study, CBPR was utilized through extensive consultation and involvement of people living with HIV where the recommendation for the study's intervention – goal setting, peer meeting, and post-discharge phone calls – was designed to be as minimally disruptive and acceptable to participants as possible.

1  
2  
3 With the context of the study's setting at Casey House (CH), a 14-bed HIV hospital with an  
4 average 45-day inpatient admission, and funding (one-year CBPR grant), a quasi-experimental pilot was  
5 developed to test peer intervention components for feasibility and acceptability.  
6  
7

### 8 **1.1 Objectives**

9

10 This study had two objectives. First, to pilot test a peer-based intervention for people living with  
11 HIV who had challenges with antiretroviral adherence and substance use and would be discharged from  
12 hospital to community; this study of feasibility and acceptability was conducted to determine whether  
13 intervention components could be applied in a larger trial. Second, to connect participants to the AIDS  
14 Committee of Toronto (ACT) – Canada's largest community-based HIV organization – for further post-  
15 discharge support. As this is a peer intervention, patient and public involvement (PPI) was prioritized so  
16 that people living with HIV had an active role in the study's design and conduct.  
17  
18

### 19 **1.2 Study Settings**

20

21 This study was conducted as a partnership between Casey House (CH) and the AIDS Committee  
22 of Toronto (ACT) in downtown Toronto, Canada. CH is Canada's only standalone hospital for people  
23 living with HIV. CH has fourteen inpatient beds for sub-acute, palliative, and respite care. Inpatient  
24 admissions average approximately 45 days due to mortality risk amongst most patients. CH also offers  
25 community programs, and during the operation of this study launched a day health program to better  
26 support adults living with HIV and complex health and psychosocial conditions. ACT is Canada's largest  
27 community-based HIV/AIDS organization and offers prevention (i.e., safer sex outreach) and support  
28 (i.e., counselling, groups) for people living with and affected by HIV. CH was responsible for chart  
29 abstraction, goal setting and hosting the peer meeting. ACT was responsible for enrolling participants,  
30 training and supervision of PVs, and coordinating connection to community-based care.  
31  
32  
33  
34

## 35 **2.0 Methods**

36

37 This study used descriptive quantitative data and qualitative methods to evaluate feasibility, and  
38 acceptability, and linkage to community supports of a pilot peer intervention that involved people living  
39 with HIV in the study's design and conduct.  
40  
41

### 42 **2.1 Study design**

43

44 Participants were enrolled into a personalized three-stage peer-based intervention.  
45 Approximately forty people were included in the sampling frame (see participant flow below). Neither  
46 randomization nor a control group were feasible due to the limited sampling frame and one-year  
47 timeline.  
48  
49

### 50 **2.2 Patient and public involvement**

51

52 People living with HIV became involved in this study as the concept was being developed and  
53 were engaged in four distinct activities. First, a community-based exploratory study interviewed CH  
54 clients about the discharge transition and found that participants were requesting peer support [18].  
55  
56  
57

1  
2  
3 Second, two CH client engagement sessions (n=17, all HIV-positive) were held regarding the structure of  
4 a post-discharge peer program, including: duration; content; definition of 'peer'; how peers should be  
5 trained; and how the pilot should be evaluated. CH clients living with HIV identified that post-discharge  
6 phone support could be easier to access than an in-person peer meeting. Third, a group consultation  
7 was held with ACT volunteers (n=10) who live with HIV and who provide direct service (e.g., support  
8 groups). This consultation discussed: the peer program requested by CH clients; program structure;  
9 evaluation methods including draft questionnaires; and whether attendees would engage with the study  
10 as a peer volunteer (delivering the intervention) or peer researcher (interviewing participants and  
11 analyzing data). Fourth, one more CH client session (n=6) was facilitated by a peer researcher to  
12 continue developing the study questionnaires and intervention details. Based on these consultations, we  
13 defined 'peer' as a person living with HIV who has personal or relational experience with substance use.  
14 There were two distinct groups of peers on this research team: a) peer researchers; and b) peer  
15 volunteers (PVs).  
16  
17  
18  
19  
20

21 Five peer researchers attended a 1.5 day, 11.5-hour training; the curriculum has been published  
22 elsewhere [30]. The main training component was filmed simulation, where peer researchers were  
23 video-recorded conducting simulated interviews to observe their verbal and non-verbal interactions  
24 [31]. Peer researchers refined the study questionnaires, collected all data, and participated in the  
25 analysis.  
26  
27

28 Five peer volunteers (PV) from ACT delivered this intervention. These volunteers completed a  
29 total of 44 training hours. The first 22 hours were dedicated to ACT's core skills volunteer training which  
30 covers: creating safe and accessible spaces; HIV and health promotion basics; concepts in  
31 communication; and anti-oppression and cultural competence. The volunteers then attended 22 hours  
32 of training specific to the intervention which focused on: harm reduction; structuring a phone call;  
33 communication tools; and self-care.  
34  
35

## 36 **2.3 Participants**

37  
38 An inpatient nurse at CH identified people living with HIV who met inclusion criteria (based on  
39 admission details) and approached them regarding their interest in learning more about the three-stage  
40 peer program. If people were interested, the principal investigator then met with them for enrolment.  
41  
42

### 43 **2.3.1 Eligibility criteria**

44  
45 Inclusion criteria: People who were HIV-positive; actively used illicit substances (e.g., cocaine, crystal  
46 meth, etc.); inpatient at CH between April 1, 2017 and March 31, 2018; initiated/re-started antiretroviral  
47 therapy while they were inpatient at CH; were discharged back to the community; English-speaking;  
48 could access a phone; and provided informed consent. Exclusion criteria: People who were at risk of  
49 mortality.  
50  
51

### 52 **2.3.2 Participant identification and consent**

53  
54 A study nurse (fourth author) identified participants based on their admission presentation (i.e.,  
55 identified substance use and ART initiation/re-initiation). The nurse approached participants to  
56  
57

1  
2  
3 introduce the study and, if they were interested in learning more, then referred them to the principal  
4 investigator (first author) for consent. To participate in the study, participants consented to the research  
5 and to becoming ACT clients. The consent process also involved discussion with participants of  
6 preferences regarding PV matches (e.g., schedule).  
7  
8

## 9 **2.4 Intervention**

10  
11 The intervention consisted of three distinct stages. Participants set discharge goals with the recruiting  
12 nurse, then met with a PV prior to discharge. Following discharge, participants scheduled nine phone  
13 calls with their PVs over seven weeks.  
14

### 15 **2.4.1 Goal-setting**

16  
17 The study nurse met with participants during their inpatient admission to help them identify  
18 three goals that they wanted to achieve after discharge. A nurse was chosen to complete this activity as  
19 a means of bridging the clinical care that participants had received in hospital, with the peer support  
20 that they would be receiving after discharge. The nurse was trained in Motivational Interviewing (i.e.,  
21 client-centred counselling to elicit positive goal-setting) [32] and harm reduction principles (i.e., stating  
22 that participants could set substance use goals concerning reduced or safer use, not solely abstinence).  
23 One goal was related to their ART adherence, another related to their substance use, and a third  
24 personal goal. These goals were written on a Community Transition Planning (CTP) form (see  
25 supplementary file) that was designed based on principles of Motivational Interviewing, whereby the  
26 facilitators and barriers to a goal are thoroughly discussed [32]. Participants identified the change they  
27 wanted to make, the steps necessary to make this change, support people (both personal and  
28 professional supports), their importance and confidence at making the change, and significant events  
29 that would occur following discharge. Goal-setting occurred one week prior to discharge, and typically  
30 lasted half an hour. The forms were shared with PVs prior to their meetings with participants.  
31  
32  
33  
34  
35  
36

### 37 **2.4.2 Peer volunteer (PV) meeting**

38  
39 The principal investigator matched a PV with a participant, based on participant requests (e.g.,  
40 similar substance use history, length of time living with HIV, gender, etc.). The dyad met at CH to discuss  
41 the participant's CTP form, how the participant was feeling about leaving hospital, and the details of  
42 phone support (e.g., when to call, what to talk about, etc.). Discharge goals were further refined in this  
43 meeting. PVs were encouraged to self-identify shared experiences that might be relevant (e.g.,  
44 substance use). This meeting occurred in the week leading up to discharge and usually took 45 minutes.  
45  
46

### 47 **2.4.3 Post-discharge phone calls**

48  
49 The PV phoned the participant once per day for the three days following discharge, then once  
50 per week for the following six weeks. This schedule was determined through client consultation; people  
51 living with HIV stated that the first 72 hours following discharge were the most difficult and when their  
52 risk of relapse was highest. Calls commonly lasted 20-45 minutes and focused on discharge goals and  
53 other issues arising for participants, with a focus on connection to community-based services.  
54  
55  
56  
57  
58  
59  
60



## 2.5 Outcomes

The outcomes and measures are detailed below and in Table 1. Feasibility was measured through: a) the proportion of eligible participants who were recruited, consented, and completed the study; and b) PV availability. Acceptability was assessed through participant interviews at three times (pre-discharge, post-intervention, and 6-week follow-up) and through logs written by PVs following each phone call. Connection to ACT (i.e., linkage to community supports) was determined through a search of client records to see if participants accessed any ACT service (such as counselling or support groups) within thirteen weeks after discharge.

| Outcomes                                                | Measures                                                                 | Description                                                                                                                                                                       |
|---------------------------------------------------------|--------------------------------------------------------------------------|-----------------------------------------------------------------------------------------------------------------------------------------------------------------------------------|
| Feasibility                                             | Participant recruitment and retention                                    | Proportion of eligible participants who were recruited, consented, and completed the study                                                                                        |
|                                                         | Peer volunteer (PV) availability                                         | Ability to match PVs with participants                                                                                                                                            |
| Acceptability                                           | Semi-structured interviews at three times, conducted by peer researchers | Interview 1: Following PV meeting, prior to discharge<br>Interview 2: Program conclusion (seven weeks after discharge)<br>Interview 3: Follow-up (thirteen weeks after discharge) |
|                                                         | Contact logs                                                             | Reports from PVs following each phone call                                                                                                                                        |
| Connection to ACT (i.e., linkage to community supports) | Client records                                                           | Participants accessing an ACT service (e.g., counselling, groups) within thirteen weeks after discharge                                                                           |

### 2.5.1 Measures

The intervention components were assessed qualitatively, with participants scheduled to complete three in-depth, semi-structured interviews with peer researchers (also living with HIV). The first interview occurred at CH following the PV meeting but prior to discharge, with questions on goal-setting and peer meeting components; medication adherence; substance use; community supports; and overall health. The second interview occurred at ACT at conclusion of peer support (week 7 following discharge). Questions from the first interview were repeated alongside probes for feedback on the post-discharge phone calls and the helpfulness of PVs sharing their own experiences. The third interview was held at ACT six weeks after the program's end (week 13 following discharge) and, alongside repeated questions from the first and second interview, focused on supports that the participant had accessed due to the peer program. Interviews were audio-recorded and averaged 00:41:20 in length.

PVs completed a contact log of each call, noting the call's content and rating how they felt the participant was doing individually (i.e., personal well-being), interpersonally (i.e., family and close relationships), socially (i.e., activity engagement, friendships), and overall (i.e., general sense of well-being). These ratings were completed using the Outcome Rating Visual Analog Scale [33], where PVs placed a mark on a 10cm unnumbered line; instructions stated that marks to the left represented 'not well at all' and marks to the right indicated 'excellent'. PVs were trained to conduct these assessments through instruction on rating participants against how they presented in the initial peer volunteer meeting. For example, a PV would assess the interpersonal domain based on a participant's progress on reconnecting with their daughter, if the participant identified this goal in the initial meeting.

## 2.6 Sample size

A sample size of fifteen was selected for feasibility as: a) CH has an average 80 discrete admissions annually; b) a clinical estimate based on retrospective chart review found that approximately half of admissions met this study's criteria; c) the hospital moved locations during our recruitment year, disrupting recruitment for approximately one month; and d) based on existing pilot studies, this sample size would allow the team to assess the feasibility and acceptability of intervention components across diverse experiences [34, 35].

## 2.7 Data analysis

Research assistants (authors ten to twelve) transcribed interviews and entered data. The entire team held three iterative analysis meetings (four hours each) to read through the data and apply content analysis. Content analysis, as used in other qualitative assessments of intervention research [36] included discussion on how findings corresponded to the study's objectives, and which quotes illuminated the facilitators and barriers of each intervention component [37]. Contact log data is presented as a spaghetti plot; while the sample size limits our ability to interpret these findings, they provide context for the quotes.

## 3.0 Results

The participant flow and characteristics are presented, followed by numbers analyzed and outcomes concerning the feasibility and acceptability of intervention components. Participant quotes include a unique identifier and gender.

### 3.1 Participant flow

Figure 1 shows the flow of participants throughout the study. Of the ninety discrete inpatient admissions at CH during the recruitment period, 73 were excluded due to: a) an eligibility review of admission presentation, namely mortality risk (n=21) and unidentified substance use (n=40); b) death in hospital (n=10); and c) declining to participate (n=2). Mortality risk was determined by an admission for palliative care or when the clinical team determined that a person was too medically unstable to participate. Unidentified substance use means that inpatients themselves nor their referring clinician identified substance use at admission.

### 3.2 Recruitment

A CH nurse approached people who: a) were inpatient at CH during the period of April 1, 2017 to March 31, 2018; b) self-identified substance use and challenges with antiretroviral adherence. Nineteen people were approached and two declined, leaving seventeen consenting to participate. Follow-up occurred seven weeks following discharge (second interview) and thirteen weeks following discharge (interview three), with the final interview occurring on July 11, 2018. The pilot program ended at this time due to the one-year funding agreement.

### 3.3 Baseline data

Participants were predominately male (58.8%, n=10) and had an average age of 48.8 (SD=11.4). Comorbidities (M=7.8, SD=3.1) most commonly were cancer, hepatitis C, and Chronic Obstructive Pulmonary Disease (COPD); participants also had mental health diagnoses (M=3.2, SD=1.5), most commonly mood disorders (e.g., bipolar disorder, depressive disorders) and organic mental disorders (e.g., HIV-associated neurocognitive disorder). Substances identified were mostly cocaine (47.1%, n=8), opioids (29.4%, n=5), and crystal meth (29.4, n=5). Participants were in hospital for an average of 44.3 days (SD=42.4) and were taking an average of 11.8 (SD=6.2) medications at discharge. Refer to Table 2 for further participant characteristics.

**Table 2: Participant characteristics (n=17, unless specified otherwise)**

| Characteristic                    | N (%) / Mean (SD) |
|-----------------------------------|-------------------|
| <b>Gender</b>                     |                   |
| Male                              | 10 (58.8%)        |
| Female                            | 7 (41.2%)         |
| <b>Age (years)</b>                | 48.8 (SD=11.4)    |
| <b>Income Source</b>              |                   |
| ODSP                              | 11 (64.7%)        |
| Other                             | 6 (35.3%)         |
| <b>Employment Status</b>          |                   |
| On disability                     | 11 (64.7%)        |
| Unemployed                        | 6 (35.3%)         |
| <b>Comorbidities</b>              |                   |
| Mental health diagnoses           | 3.2 (SD=1.5)      |
| Total comorbidities               | 7.8 (SD=3.1)      |
| <b>Housing prior to admission</b> |                   |
| Independent living                | 9 (52.9%)         |
| Supportive housing                | 5 (29.4%)         |
| Shelter                           | 1 (5.9%)          |

|                                                  |                                   |
|--------------------------------------------------|-----------------------------------|
| Street-involved                                  | 1 (5.9%)                          |
| Rooming house                                    | 1 (5.9%)                          |
| <b>Housing following discharge</b>               |                                   |
| Independent living                               | 9 (52.9%)                         |
| Supportive housing                               | 6 (35.3%)                         |
| Rooming house                                    | 1 (5.9%)                          |
| Unknown                                          | 1 (5.9%)                          |
| <b>Reason for admission</b>                      |                                   |
| ART re-/initiation                               | 7 (41.2%)                         |
| Psychosocial issues                              | 5 (29.4%)                         |
| Acute medical condition                          | 2 (11.8%)                         |
| Respite                                          | 2 (11.8%)                         |
| Post-surgical recovery                           | 1 (5.9%)                          |
| <b>Years living with HIV</b>                     | 16.2 (SD=9.1)                     |
| <b>CD4 (N=14)</b>                                |                                   |
| >500                                             | 5 (35.7%)                         |
| 200-500                                          | 4 (28.6%)                         |
| <200                                             | 5 (35.7%)                         |
| <b>*Substances identified</b>                    |                                   |
| Crack cocaine                                    | 8 (47.1%)                         |
| Opioids                                          | 5 (29.4%)                         |
| Crystal meth                                     | 5 (29.4%)                         |
| *most common                                     |                                   |
| <b>Total # of medications at discharge</b>       | 11.8 (SD=6.2)                     |
| <b>Post-discharge care</b>                       |                                   |
| Family doctor                                    | 17 (100%)                         |
| Allied health (nursing, psychiatry, social work) | 17 (100%)                         |
| Substance use program                            | 9 (52.9%)                         |
| HIV specialist                                   | 7 (41.2%)                         |
| Adherence reminders                              | 5 (29.4%)                         |
| <b>Length of admission</b>                       | 44.3 days (SD=42.4),<br>Median=26 |

### 3.4 Numbers analyzed

For feasibility, results are presented against a denominator of 19 (number of participants approached); this includes two people who declined to participate and five who did not complete the

1  
2  
3 intervention. For acceptability, a denominator of 12 is used as this number participated in all  
4 intervention components and completed follow-up interviews.  
5

### 6 7 **3.5 Outcomes**

8  
9 The intervention was feasible to recruit and coordinate, and led to participant connection to  
10 ACT services. The first two intervention components (goal-setting and peer volunteer meeting) were  
11 highly acceptable to participants, while the third (post-discharge phone calls) was well-received by half  
12 of completers but the other half had challenges engaging by phone. Patient and Public Involvement (PPI)  
13 contributed positively to study outcomes. Throughout the interviews, participants stated how much  
14 they appreciated that people living with HIV collaborated in the study's design, delivered the  
15 intervention, and conducted their interviews.  
16  
17

#### 18 19 **3.5.1 Feasibility**

20  
21 Overall, 63.1% (n=12) of participants who were approached completed the intervention. Within  
22 a one-year recruitment timeline, five PVs were matched with sixteen participants (i.e., each volunteer  
23 had approximately three matches); there was only one instance where no volunteer was available to be  
24 matched with a participant. PPI may have contributed to ease of recruitment, as potential participants  
25 had heard about the study and contributed to its design. PVs received modest compensation at \$150  
26 per match.  
27  
28

#### 29 30 **3.5.2 Acceptability**

31  
32 The goal-setting and peer meeting components were acceptable to participants, with strong  
33 participation and positive feedback in interviews. Post-discharge phone calls were a challenge, as half of  
34 the participants who participated in this component (n=6) lost their phones, changed their numbers,  
35 and/or did not answer at some point over the six weeks of the program. This left six participants  
36 completing all nine calls as scheduled. From the twelve participants who engaged with phone calls, the  
37 mean number of calls per match was 5.8 Acceptability results for each intervention component are  
38 detailed below.  
39  
40

##### 41 42 **3.5.2.1 Goal-setting acceptability**

43  
44 Most participants (n=15) identified goals for the seven weeks after discharge related to: 1)  
45 antiretroviral adherence; 2) substance use; and 3) a personal goal (most commonly, housing and social  
46 connection). Participants rated their importance and confidence of each goal on a scale from '1' (not at  
47 all) to '10' (very much); figure 2 shows these results.  
48

49  
50 Participants expressed a high degree of confidence in achieving their adherence goals, despite a  
51 reported history of challenges. Substance use goals were primarily abstinence-based and had the lowest  
52 confidence of success. Open-ended goals were identified as the most important and primarily focused  
53 on improving living space and social connections. One participant described the goal-setting process  
54 thusly:  
55  
56  
57  
58  
59  
60

1  
2  
3 [The nurse and I] went over my needs and my goals. Where my frame of mind was at. What  
4 things did I think would help me turn this rig around, kinda? [The nurse] figured who I could see  
5 to help me along the way...she was top shelf, y'know?... Like hey, yeah, she let me talk and she  
6 let me kind of lead the way and then she wrote down [my goals]. It [took] about twenty  
7 minutes, and then again after she wrote everything down and she filled out her form, then came  
8 back and showed me...to verify she had captured everything (P15, male).  
9  
10

11 Another participant talked about how familiarity with the nurse helped the goal-setting process:

12  
13 Me and [nurse] have always gotten along great. Well, I get along with all the nurses but there's a  
14 couple that I can talk to about anything and she's one of them...it made me think, let's try this  
15 [program]. Give it a fair shot (P16, female).  
16  
17

### 18 **3.5.2.2 Peer volunteer meeting acceptability**

19  
20 Thirteen participants met with an ACT peer volunteer at CH, following goal-setting and prior to  
21 discharge, to discuss upcoming discharge, goals, and to make a plan for post-discharge phone calls.  
22 Participants appreciated the opportunity to meet with a peer; this was their first non-clinical service  
23 interaction during their hospital stay. As one person said, "He told me where he's at...and I shared a bit,  
24 [I was] thinking this guy is going to be a counsellor...and then I realized, huh, this guy's on my level" (P3,  
25 male).  
26  
27  
28

29 In the consultations with people living with HIV to design this study, the issue of demographics  
30 was raised regarding whether people would be able to connect across ages, genders, etc. Participants  
31 felt comfortable connecting with their volunteer regardless of these identities, with one participant  
32 saying:  
33  
34

35 I wasn't expecting somebody that young to be able to interact with me and understand me...I  
36 was even more comfortable when she told me she had HIV. And then I forgot all about  
37 [demographics], like we started talking you know she knows how to interact. It's not a thing  
38 anybody can do. It's not just about asking the questions it's about making the person feel  
39 comfortable and she did that with me (P6, female).  
40  
41

### 42 **3.5.2.3 Post-discharge phone call acceptability**

43  
44 Peer volunteers phoned participants once per day for the first three days following discharge,  
45 then once per week for the following six weeks. The phone calls were the most challenging component  
46 of this intervention as half of the participants lost their phones, changed their numbers, and/or did not  
47 answer at some point over the program's duration. Participants engaged well while on the phone,  
48 speaking with peer volunteers about their discharge goals, other issues in their lives, and how to  
49 improve their health and social engagement.  
50  
51

52 Some participants appreciated the flexibility of phone calls and felt they could engage with a  
53 peer volunteer in this manner, as one person said:  
54  
55  
56  
57  
58  
59  
60

1  
2  
3 The way we were able to interact, communicate, understand. It was like he understood  
4 everything I was saying and I understood everything he was saying. And it was great. I couldn't  
5 imagine not having someone like him. Yes, because it made me think, how do I explain it, in the  
6 last few years, I've been stuck in a hole. Like it just flew, no one to talk to, not one to help,  
7 nowhere to reach out, no nothing. When [Volunteer] came along it was like having a peer in a  
8 different type of background and culture (P9, male).  
9  
10

11 Phone calls occasionally occurred at important times for participants, as shown in the following quote:

12  
13  
14 A lot of the time I couldn't get in touch with my [in-person outpatient supports] but my peer  
15 would call me every week, she was a big help. I almost had a few relapses, but I didn't [relapse].  
16 Actually it was my peer, once I was about to use and she called me! It was so weird, but in a  
17 good way. I told her I really need this call right now (P13, female).  
18  
19

20 Other participants indicated that the phone calls felt impersonal and that in-person peer  
21 support was preferable, with a participant saying "I'm just not a phone person...I don't know, I just can't.  
22 It's easier [in-person], you don't really know somebody [over the phone]" (P1, female).  
23

24 Figure 3 displays the Visual Analog Scale results from the PV call logs. Overall, the most difficult  
25 period was 1-2 weeks post-discharge with participants improving by 5-6 weeks after leaving hospital.  
26 Participants who were lost to follow-up were rated lower than people who completed the program.  
27  
28

### 29 3.5.3 Connection to ACT

30  
31 Over half (57.9%, n=11) of the total sample connected to ACT services. Interestingly, two  
32 participants who did not complete the intervention (one was lost to follow-up and we were unable to  
33 match the other with a peer volunteer) still connected to ACT. ACT services that participants accessed  
34 included counselling, support groups, and lunch programs.  
35  
36

### 37 3.6 Harms

38  
39 There were no reported study-related harms.  
40

## 41 4.0 Discussion

42  
43 The principal findings of this pilot are that: a) pre-discharge goal-setting and a peer volunteer  
44 meeting were feasible and acceptable for a sample of people living with HIV and complex needs; b)  
45 while some participants appreciated post-discharge phone calls, others experienced barriers to this  
46 method of engagement; and c) a clinical and a community-based HIV organization can partner for  
47 improved connection to care.  
48  
49

50  
51 Compared to other studies, a strength of this study was its substantial involvement of people  
52 living with HIV at multiple stages. This PPI approach may have made recruitment easier and contributed  
53 towards the positive experience that participants had with multiple intervention components [38].  
54 Another strength was this study's focus on people with complex needs; participants averaged eight  
55 comorbidities (e.g., AIDS, cancer, hepatitis C) and are commonly lost to follow-up from outpatient  
56  
57

1  
2  
3 clinical care at CH, so the finding that 65% (n=11) connected with ACT services suggests that peer  
4 support can be a helpful catalyst in the discharge transition [20].  
5

6  
7 For clinicians, this study presents two intervention components – pre-discharge goal setting and  
8 peer meeting – that can be feasibly incorporated into practice at low cost and time commitment which  
9 may ease the discharge transition for people experiencing complex medical and psychosocial needs. For  
10 policymakers, this study responds to a call for greater collaboration between clinical and community-  
11 based care [26] by highlighting how a hospital and a community agency can partner to provide peer  
12 support.  
13

14  
15 The goal-setting and peer meeting intervention components need to be tested in a larger trial  
16 with greater rigour and a sufficient sample, using standardized measures, to properly ascertain their  
17 effectiveness. A larger study should consider results from other peer support trials, such as a null effect  
18 on antiretroviral adherence due to low-intensity (i.e., phone support) interventions [39] and significant  
19 results in adherence and care retention through home visits [40]. Future research on post-discharge  
20 peer support with a complex population group should therefore explore more intensive supports than  
21 weekly phone contact; in-person follow-up, whether meeting in social spaces (such as coffee shops),  
22 home visits, or outpatients returning to hospital for post-discharge peer groups could be combined with  
23 phone calls as more supportive methods of retaining people in care.  
24  
25

#### 26 27 28 **4.1 Limitations**

29  
30 This study has several limitations. Without randomization and control and with a small sample,  
31 there remains uncertainty regarding the two promising intervention components (goal-setting and peer  
32 meeting). Other peer support studies have found significant effects in larger samples by focusing on a  
33 single issue of concern [19, 20]. A PPI limitation was the mixed results from the post-discharge phone  
34 calls. Phone support had been specifically requested from current and former CH clients living with HIV,  
35 during our consultations to design this study, as they perceived it to be a convenient and minimally  
36 disruptive way of accessing peer support. There is a risk of selection bias as eligible participants who  
37 were at risk of mortality were not approached [41]. PV assessments of participants may have been  
38 biased, likely in the direction of showing positive change [42]. Incomplete participation amongst a small  
39 sample requires that the results be interpreted with some caution.  
40  
41

#### 42 43 **4.2 Applicability**

44  
45 The goal-setting and peer meeting components show preliminary promise for easing the  
46 discharge transition for people living with HIV and complex needs. These components could be more  
47 rigorously tested by other hospitals, where peers can be adequately trained and supported, to address  
48 high rates of lost-to-follow-up and eventual readmission for complex clients.  
49  
50

#### 51 52 **4.3 Interpretation**

53  
54 While there is some uncertainty regarding this study's benefits, we found no evidence of study  
55 harm. Peer support has been found effective on single issues regarding HIV (such as medication  
56  
57



1  
2  
3 adherence) [19, 20]; this study's attempt to pilot peer support regarding more complex needs is a first  
4 step towards better supporting the more marginalized people living with HIV who require more targeted  
5 support than is currently offered. This study's positive results with connection to ACT services aligns  
6 with other studies that found improved care engagement as a result of a peer intervention [40, 43, 44].  
7 Qualitatively, this study's participants expressed views similar to other peer intervention studies  
8 regarding the ease of speaking with a peer and the benefit of shared experience [19, 45, 46]. However,  
9 this study found that PVs and participants were able to connect despite differences in age, health status,  
10 and other demographics, which differs from other studies that recommend peers share as many  
11 subgroup characteristics as possible [45, 47].  
12  
13  
14

15  
16 The PPI approach helped facilitate study recruitment and the first two intervention components,  
17 yet the third component (post-discharge phone calls) received mixed results despite its PPI influence.  
18 Given this study's results and in-person peer support showing better outcomes than post-discharge  
19 phone calls in other quasi-experimental studies [48, 49], a future post-discharge peer support study  
20 could combine phone and in-person meetings. Multiple methods of engagement may be more  
21 acceptable to participants and contribute to greater completion rates, which could lead to better  
22 outcomes.  
23  
24

## 25 **5.0 Conclusion**

26  
27 This pilot study presents two intervention components (goal-setting and peer volunteer  
28 meeting) that have preliminary proof-of-concept in easing the discharge transition and connection to  
29 community-based care for people living with HIV and complex needs. More research is needed to  
30 determine the ideal form of post-discharge peer support for this population.  
31  
32

## 33 **Author contributions**

34  
35 **ADE** oversaw all study activities, supervised personnel, consented participants, led the analysis and  
36 interpretation of results, and wrote the first draft of the manuscript. **SCC** led patient engagement  
37 activities and co-led analysis and interpretation of results. **SLC** co-led analysis and interpretation of  
38 results and met monthly with ADE and SCC to discuss study progress. **ET** facilitated participant goal-  
39 setting and coordinated peer volunteer meetings and discharge timing. **JWM, DM, WW, LZ, and KB**  
40 contributed to study design and collected data. **GFG, GAW, and MM** prepared data for analysis through  
41 transcription and data entry. **AB** and **NB** trained peer volunteers with ADE. **CS** and **AS** contributed to  
42 study design and analysis. All the authors co-conceptualized the study, contributed to analysis, critically  
43 reviewed the manuscript, and approved the final submitted version of the manuscript.  
44  
45  
46  
47

## 48 **Competing interests**

49  
50 There are no competing interests for any author.  
51

## 52 **Funding**

53  
54 This work was funded by the Ontario HIV Treatment Network (OHTN) through a Community-Based  
55 Research and Evaluation Grant (Grant number CBRG1074), with additional support from Universities  
56  
57

1  
2  
3 Without Walls (UWW) and the Canadian Association for HIV Research (CAHR) through their Flipped  
4 Workshop mentoring program. ADE is supported by an Ontario Graduate Scholarship (OGS). SLC is a  
5 Canada Research Chair. The funders did not have a role in the design and conduct of the study, nor in  
6 the decision to submit the study for publication. This study was approved by the University of Toronto's  
7 HIV/AIDS Research Ethics Board (Protocol ID# 34124).  
8  
9

### 10 **Data sharing statement**

11  
12 Data not reported in this article (i.e., de-identified interview transcripts) may be available, pending  
13 consultation with the University of Toronto's HIV/AIDS Research Ethics Board (REB). Data requests may  
14 be sent to the principal investigator at [andrew.eaton@utoronto.ca](mailto:andrew.eaton@utoronto.ca), who will consult with the REB.  
15  
16

### 17 **Acknowledgements**

18  
19 We wish to thank all our study participants for their voluntary participation, and all of the people living  
20 with HIV who contributed to the study's design. Thank you to Dr. Sharon Walmsley for critically  
21 reviewing this manuscript and to Leah Szadkowski and Minnie Cui for assistance with the figures.  
22  
23

### 24 **Exclusive License**

25  
26 I, the Submitting Author has the right to grant and does grant on behalf of all authors of the Work (as  
27 defined in the below author licence), an exclusive licence and/or a non-exclusive licence for  
28 contributions from authors who are: i) UK Crown employees; ii) where BMJ has agreed a CC-BY licence  
29 shall apply, and/or iii) in accordance with the terms applicable for US Federal Government officers or  
30 employees acting as part of their official duties; on a worldwide, perpetual, irrevocable, royalty-free  
31 basis to BMJ Publishing Group Ltd ("BMJ") its licensees and where the relevant Journal is co-owned by  
32 BMJ to the co-owners of the Journal, to publish the Work in BMJ Open and any other BMJ products and  
33 to exploit all rights, as set out in our [licence](#).  
34  
35  
36  
37

38 The Submitting Author accepts and understands that any supply made under these terms is made by  
39 BMJ to the Submitting Author unless you are acting as an employee on behalf of your employer or a  
40 postgraduate student of an affiliated institution which is paying any applicable article publishing charge  
41 ("APC") for Open Access articles. Where the Submitting Author wishes to make the Work available on an  
42 Open Access basis (and intends to pay the relevant APC), the terms of reuse of such Open Access shall  
43 be governed by a Creative Commons licence – details of these licences and which [Creative Commons](#)  
44 licence will apply to this Work are set out in our licence referred to above.  
45  
46  
47  
48  
49  
50  
51  
52  
53  
54  
55  
56  
57  
58  
59  
60

## References

1. Allaudeen N, Vidyarthi A, Massell, J, Auerback A. Redefining readmission risk factors for general medicine patients. *J Hosp Med* 2011;6:54-60.
2. Kay ES, Batey DS, Mugavero MJ. The HIV treatment cascade and care continuum: Updates, goals, and recommendations for the future. *AIDS Res Ther* 2016;13:1-7. doi:10.1186/s12981-016-0120-0
3. Kimmel AD, Martin EG, Galadima H, et al. Clinical outcomes of HIV care delivery models in the US: A systematic review. *AIDS Care* 2016;28:1215-1222. doi:10.13039/1000000060
4. Schaink AK, Kuluski K, Lyons RF, et al. A scoping review and thematic classification of patient complexity: Offering a unifying framework. *J Comorbid* 2012;2:1-9.
5. Grudniewicz A, Nelson M, Kuluski K, et al. Treatment goal setting for complex patients: Protocol for a scoping review. *BMJ Open* 2016;6(e011869). doi:10.1136/bmjopen-2016-011869
6. Omland LH, Ahlström MG, Obel N. Cohort profile update: The Danish HIV cohort study (DHCS). *Int J Epidemiol* 2014;43:1769-1769e. doi:10.1093/ije/dyu153
7. Hasse B, Ledergerder B, Furrer H, et al. Morbidity and aging in HIV-infected persons: The Swiss HIV cohort study. *Clin Infect Dis* 2011;53:1130-1139. doi:10.1093/cid/cir626
8. Bekele T, Globerman J, Watson J, et al. Prevalence and predictors of food insecurity among people living with HIV affiliated with AIDS service organizations in Ontario, Canada. *AIDS Care* 2018;30:663-671. doi:10.13039/501100000024
9. Halman M, Chan Carusone S, Stranks S, Schaefer-McDaniel N & Stewart A. Complex care needs of patients with late-stage HIV disease: A retrospective study. *AIDS Care* 2014;26:320-325. doi:10.1080/09540121.2013.819404
10. Rueda S, Law S, & Rourke SB. Psychosocial, mental health, and behavioral issues of aging with HIV. *Curr Opin HIV/AIDS* 2014;9:325-331. doi:10.1097/COH.0000000000000071
11. Szadkowski L, Walmsley S, Burchell AN, et al. High retention in HIV care at a tertiary care centre in Toronto, Canada. *AIDS Care* 2017;30:246-254.
12. Babatunde E, Medha I, Helmut A, Weissman, S. The South Carolina HIV cascade of care. *South Med J* 2015;108:670-674. doi:10.14423/SMJ.0000000000000368

- 1  
2  
3 13. Powers KA, Miller WC. Critical review: Building on the HIV cascade. *JAIDS* 2015;69:341-347.doi:  
4 10.1097/QAI.0000000000000611  
5  
6
- 7 14. Bruton J, Rai T, Day S, Ward H. Patient perspectives on the HIV continuum of care in London: A  
8 qualitative study of people diagnosed between 1986 and 2014. *BMJ Open* 2018;8(e0202208).  
9 doi:10.1136/bmjopen-2017-020208  
10  
11
- 12 15. Rachlis B, Burchell AN, Gardner S, et al. Social determinants of health and retention in HIV care  
13 in a clinical cohort in Ontario, Canada. *AIDS Care* 2016;29:828-837.  
14 doi:10.1080/09540121.2016.1271389  
15  
16
- 17 16. Cohen MS, Chen YQ, McCauley M, et al. Antiretroviral therapy for the prevention of HIV-1  
18 transmission. *N Engl J M* 2016;375:830-839. doi:10.1056/NEJMoa1600693  
19  
20
- 21 17. Rodger AJ, Cambiano V, Brunn T, et al. Sexual activity without condoms and risk of HIV  
22 transmission in serodifferent couples when the HIV-positive partner is using suppressive  
23 antiretroviral therapy. *JAMA* 2016;316:171-181. doi:10.1001/jama.2016.5148  
24  
25
- 26 18. Chan Carusone S, O'Leary B, McWatt S, Stewart A, Craig S, Brennan DJ. The lived experience of  
27 the hospital discharge "plan": A longitudinal qualitative study of complex patients. *J Hosp Med*  
28 2017;12:5-10.  
29  
30
- 31 19. Genberg BL, Shangani S, Sabatino K, et al. (2016). Improving engagement in the HIV care  
32 cascade: A systematic review of interventions involving people living with HIV/AIDS as peers.  
33 *AIDS Behav* 2016;20:2452. ISSN:1090-7165  
34  
35
- 36 20. Simoni JM, Nelson KM, Franks JC, Yard SS, Lehavot K. Are peer interventions for HIV efficacious?  
37 A systematic review. *AIDS and Behavior* 2011;15:1589-1595. ISSN:1090-7165  
38  
39
- 40 21. Shangani S, Escudero D, Kirwa K, Harrison, A, Marshall B, Operario D. Effectiveness of peer-led  
41 interventions to increase HIV testing among men who have sex with men: A systematic review  
42 and meta-analysis. *AIDS Care* 2017;29:1003-1011. ISSN:0954-0121  
43  
44
- 45 22. Eaton AD, Tsang AKT, Craig SL, Ginocchio, GF. Peer researchers in post-professional healthcare:  
46 A glimpse at motivations and partial objectivity as opportunities for action researchers. *Action*  
47 *Res J* 2018. doi:10.1177/14776750318811913  
48  
49
- 50 23. Kerrigan DL, Fonner VA, Stromdahl S, Kennedy, CE. Community empowerment among female  
51 sex workers is an effective HIV prevention intervention: A systematic review of the peer-  
52 reviewed evidence from low and middle-income countries. *AIDS Behav* 2013;17:1926-1940.  
53 ISSN:1090-7165  
54  
55  
56  
57  
58  
59

- 1  
2  
3 24. Maticka-Tyndale E, Barnett JP. Peer-led interventions to reduce HIV risk of youth: A review.  
4 *Evalu Program Plann* 2010;33(2):98.  
5  
6  
7 25. Medley A, Kennedy C, O'Reilly K, Sweat M. Effectiveness of peer education interventions for HIV  
8 prevention in developing countries: A systematic review and meta-analysis. *AIDS Educ Prev*  
9 2009;21:181-206. ISSN:0899-9546  
10  
11  
12 26. Bacon J, the Ontario Advisory Committee on HIV/AIDS. HIV/AIDS strategy to 2026: Focusing our  
13 efforts – changing the course of the HIV prevention, engagement and care cascade in Ontario.  
14 *Ministry of Health and Long Term Care* 2016.  
15 [http://www.health.gov.on.ca/en/pro/programs/hivaids/docs/oach\\_strategy\\_2026.pdf](http://www.health.gov.on.ca/en/pro/programs/hivaids/docs/oach_strategy_2026.pdf)  
16  
17  
18 27. UNAIDS. Communities deliver: The critical role of communities in reaching global targets to end  
19 the AIDS epidemic. *UNAIDS* 2015.  
20 [http://www.unaids.org/sites/default/files/media\\_asset/UNAIDS\\_JC2725\\_CommunitiesDeliver\\_e](http://www.unaids.org/sites/default/files/media_asset/UNAIDS_JC2725_CommunitiesDeliver_en.pdf)  
21 [n.pdf](http://www.unaids.org/sites/default/files/media_asset/UNAIDS_JC2725_CommunitiesDeliver_en.pdf)  
22  
23  
24 28. Israel BA, Coombe CM, Cheezum RR, et al. Community-based participatory research: A capacity-  
25 building approach for policy advocacy aimed at eliminating health disparities. *Am J Public Health*  
26 2011;100:2094-2102. doi:10.2105/AJPH.2009.170506  
27  
28  
29 29. May C. We need minimally disruptive medicine. *BMJ* 2009;339(b2803). doi:10.1136/bmj.b2803  
30  
31  
32 30. Eaton AD, Ibáñez-Carrasco F, Craig SL, et al. (2018). A blended learning curriculum for training  
33 peer researchers to conduct community-based participatory research. *Action Learn Res Pract*  
34 2018;15:139-150. doi:10.1080/14767333.2018.1462143  
35  
36  
37 31. Eaton AD. (in press). Filmed simulation to train peer researchers in community-based  
38 participatory research. *Soc Work Res*.  
39  
40  
41 32. Hettema J, Steele J, Miller WR. Motivational interviewing. *Annu Rev Clin Psychol* 2005;1:91-111.  
42 doi:1146/annurev.clinpsy.1.102803.143833  
43  
44  
45 33. Campbell A, Hemsley S. (2009). Outcome rating scale and session rating scale in psychological  
46 practice: Clinical utility of ultra-brief measures. *Clin Psychol* 2009;13:1-9.  
47 doi:10.1080/13284200802676391  
48  
49  
50 34. Imes CC, Dougherty CM, Lewis FM, Ausain MA. Outcomes of a pilot intervention study for young  
51 adults at risk of cardiovascular disease based on their family history. *J Cardiovasc Nurs*  
52 2016;31(5);433-440. doi:10.1097/JCN.0000000000000261  
53  
54  
55  
56  
57  
58  
59  
60

- 1  
2  
3 35. Pettifor A, Mac Phail CL, Nguyen N, et al. Feasibility and acceptability of project connect: A  
4 couples-based HIV-risk reduction intervention among young couples in Johannesburg, South  
5 Africa. *AIDS Care* 2014;26(4);476-482. doi:10.1080/09540121.2013.841827  
6  
7  
8 36. Pérez-Jiménez D, Orengo-Aguayo RE. Qualitative analysis on an educational intervention with  
9 HIV-discordant heterosexual Latino couples. *P R Health Sci J* 2011;30(4);188-194.  
10 PMID:22263299  
11  
12  
13 37. Bengtsson M. How to plan and perform a qualitative study using content analysis. *NursingPlus*  
14 *Open* 2016;2;8-14. doi:10.1016/j.npls.2016.01.001  
15  
16  
17 38. Eaton AD, Cattaneo JS, Watchorn JM, et al. From serodiscordant to magnetic: The feasibility and  
18 acceptability of a pilot psychoeducational group intervention designed to improve relationship  
19 quality. *Soc Work with Groups* 2017;41:323-335. doi:10.1080/01609513.2017.1369922  
20  
21  
22 39. Simoni JM, Pantalone DW, Plummer MD, Huang B. A randomized controlled trial of a peer  
23 support intervention targeting antiretroviral medication adherence and depressive  
24 symptomatology in HIV-positive men and women. *Health Psychol* 2014; 26(4);488-495.  
25 doi:10.1037/0278-6133.26.4.488  
26  
27  
28 40. Chang LW, Nakigozi G, Billioux VG, et al. Effectiveness of peer support on care engagement and  
29 preventive care intervention utilization among pre-antiretroviral therapy, HIV-infected adults in  
30 Rakai, Uganda: A randomized trial. *AIDS Behav* 2015;19(10);1742-1751. doi:10.1007/s10461-  
31 015-1159-y  
32  
33  
34 41. Henderson M, Page L. Appraising the evidence: What is selection bias? *Evidence-Based Ment*  
35 *Health* 2007;10:67-68.  
36  
37  
38 42. Walfish S, McAlister B, O'Donnell P, Lambert MJ. An investigation of self-assessment bias in  
39 mental health providers. *Psychol Rep* 2012;110(2):639-644.  
40 doi:10.2466/02.07.17.PR0.110.2.639-644  
41  
42  
43 43. Hatcher AM, Turan JM, Leslie HH, et al. Predictors of linkage to care following community-based  
44 HIV counseling and testing in rural Kenya. *AIDS Behavior* 2012;16(5):1295-1307. doi:  
45 10.1007/s10461-011-0065-1  
46  
47  
48 44. Richter L, Rotheram-Borus MJ, Van Heerden A, et al. Pregnant women living with HIV (WLH)  
49 supported at clinics by peer WLH: A cluster randomized controlled trial. *AIDS Behavior*  
50 2014;18(4):706-715. doi: 10.1007/s10461-014-0694-2  
51  
52  
53  
54  
55  
56  
57  
58  
59  
60

- 1  
2  
3  
4  
5  
6  
7  
8  
9  
10  
11  
12  
13  
14  
15  
16  
17  
18  
19  
20  
21  
22  
23  
24  
25  
26  
27  
28  
29  
30  
31  
32  
33  
34  
35  
36  
37  
38  
39  
40  
41  
42  
43  
44  
45  
46  
47  
48  
49  
50  
51  
52  
53  
54  
55  
56  
57  
58  
59  
60
45. Hallum-Montes R, Morgan S, Rovito HM, Wisby C, Anastario MP. Linking peers, patients, and providers: A qualitative study of a peer integration program for hard-to-reach patients living with HIV/AIDS. *AIDS Care* 2013;25(8):968-972. doi:10.1080/09540121.2012.748869
46. Koester KA, Morewitz M, Pearson C, et al. Patient navigation facilitates medical and social services engagement among HIV-infected individuals leaving jail and returning to the community. *AIDS Patient Care STDS* 2014;28(2):82-90. doi:10.1089/apc.2013.0279
47. Yan H, Zhang R, Wei C, et al. A peer-led, community-based rapid HIV testing intervention among untested men who have sex with men in China: An operational model for expansion of HIV testing and linkage to care. *Sex Transm Infect* 2014;90(5):388-393. doi:10.1136/sextrans-2013-051397
48. Mash R, Mash RJ. A quasi-experimental evaluation of an HIV prevention programme by peer education in the Anglican church of the Western Cape, South Africa. *BMJ Open* 2012;2(3000638). doi:10.1136/bmjopen-2011-000638
49. Harper GW, Bangi AK, Sanchez B, Doll M, Pedraza A. A quasi-experimental evaluation of a community-based HIV prevention intervention for Mexican American female adolescents: The Shero's program. *AIDS Educ Prev* 2009;21:109-123.

1  
2  
3  
4  
5  
6  
7  
8  
9  
10  
11  
12  
13  
14  
15  
16  
17  
18  
19  
20  
21  
22  
23  
24  
25  
26  
27  
28  
29  
30  
31  
32  
33  
34  
35  
36  
37  
38  
39  
40  
41  
42  
43  
44  
45  
46  
47  
48  
49  
50  
51  
52  
53  
54  
55  
56  
57  
58  
59  
60

**Figure Legend**

Figure 1: Participant flowchart

Figure 2: Participant goals: Self-rated importance and confidence

Figure 3: Peer volunteer assessment of participants following each call

For peer review only





Figure 1: Participant flowchart

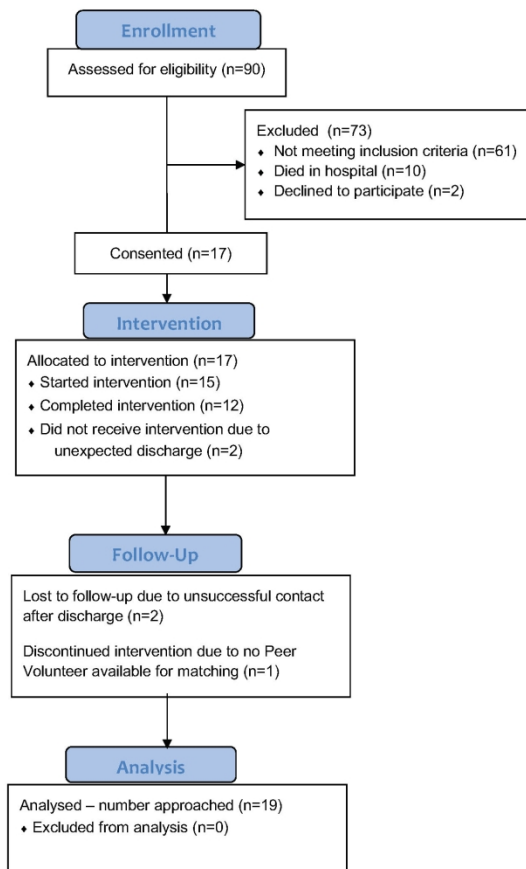

Figure 1: Participant flowchart

1  
2  
3  
4  
5  
6  
7  
8  
9  
10  
11  
12  
13  
14  
15  
16  
17  
18  
19  
20  
21  
22  
23  
24  
25  
26  
27  
28  
29  
30  
31  
32  
33  
34  
35  
36  
37  
38  
39  
40  
41  
42  
43  
44  
45  
46  
47  
48  
49  
50  
51  
52  
53  
54  
55  
56  
57  
58  
59  
60

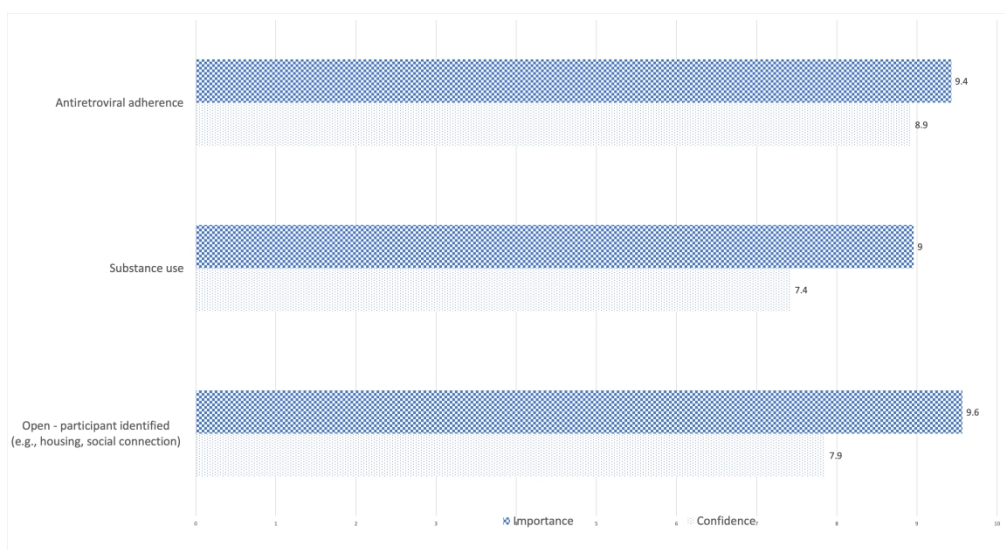

Figure 2: Participant goals: Self-rated importance and confidence  
275x149mm (300 x 300 DPI)

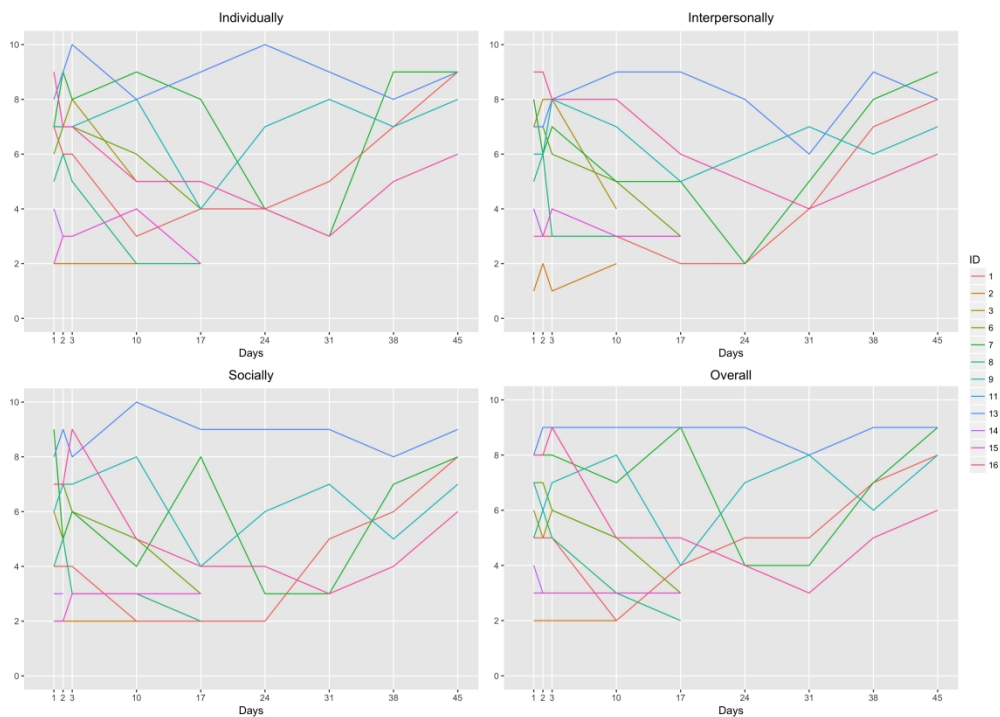

Figure 3: Peer volunteer assessment of participants following each call

## ART of Conversation – Community Transition Planning Forms (CTP)

### Community transition change plan

|                                                                                     |                                                                              |
|-------------------------------------------------------------------------------------|------------------------------------------------------------------------------|
| Goal #1: <b>HIV Medications</b>                                                     |                                                                              |
| <b>(Note: A CTP form is completed for each area identified by participant)</b>      |                                                                              |
| <i>The change I want to make (or continue making) is:</i>                           |                                                                              |
| <i>Some barriers or difficulties that may get in the way are:</i>                   |                                                                              |
| <i>The steps I plan to take in making this change are:</i>                          |                                                                              |
| <i>The person/agency/organization that can support me in making this change is:</i> |                                                                              |
| Name:                                                                               |                                                                              |
| Contact info:                                                                       |                                                                              |
| How can they help:                                                                  |                                                                              |
| <i>How important is it to you to make this change?<br/>(1-10 scale)</i>             | <i>How confident are you that you can make this<br/>change? (1-10 scale)</i> |

### Support people/agency/organization

| Name                                                                          | Role                            | Contact info.  |
|-------------------------------------------------------------------------------|---------------------------------|----------------|
| i.e. Chris Smith                                                              | A friend who helps walk my cat. | (416) 962-7600 |
| (Names the person puts forward while in the mind set of discharge transition) |                                 |                |
|                                                                               |                                 |                |
|                                                                               |                                 |                |

### Significant dates/appointments/events following discharge

| Date                     | Details                                                                                                                            |
|--------------------------|------------------------------------------------------------------------------------------------------------------------------------|
| i.e. Jan 1 <sup>st</sup> | My partners birthday                                                                                                               |
|                          | (Some significant dates will be in the chart/discharge summary but this completed box can venture beyond medical appts./referrals) |
|                          |                                                                                                                                    |
|                          |                                                                                                                                    |

Community transition change plan

|                                                                                                                              |                                                                      |
|------------------------------------------------------------------------------------------------------------------------------|----------------------------------------------------------------------|
| Goal #2: <b>Substance Use</b><br>(Note: A CTP form is completed for each area identified by participant)                     |                                                                      |
| The change I want to make (or continue making) is:                                                                           |                                                                      |
| Some barriers or difficulties that may get in the way are:                                                                   |                                                                      |
| The steps I plan to take in making this change are:                                                                          |                                                                      |
| The person/agency/organization that can support me in making this change is:<br>Name:<br>Contact info:<br>How can they help: |                                                                      |
| How important is it to you to make this change?<br>(1-10 scale)                                                              | How confident are you that you can make this change?<br>(1-10 scale) |

Support people/agency/organization

| Name                                                                          | Role                            | Contact info.  |
|-------------------------------------------------------------------------------|---------------------------------|----------------|
| i.e. Chris Smith                                                              | A friend who helps walk my cat. | (416) 962-7600 |
| (Names the person puts forward while in the mind set of discharge transition) |                                 |                |
|                                                                               |                                 |                |
|                                                                               |                                 |                |

Significant dates/appointments/events following discharge

| Date                     | Details                                                                                                                            |
|--------------------------|------------------------------------------------------------------------------------------------------------------------------------|
| i.e. Jan 1 <sup>st</sup> | My partners birthday                                                                                                               |
|                          | (Some significant dates will be in the chart/discharge summary but this completed box can venture beyond medical appts./referrals) |
|                          |                                                                                                                                    |
|                          |                                                                                                                                    |

Community transition change plan

|                                                                                                                              |                                                                   |
|------------------------------------------------------------------------------------------------------------------------------|-------------------------------------------------------------------|
| <b>Goal #3: Open - client-identified</b><br><b>(Note: A CTP form is completed for each area identified by participant)</b>   |                                                                   |
| The change I want to make (or continue making) is:                                                                           |                                                                   |
| Some barriers or difficulties that may get in the way are:                                                                   |                                                                   |
| The steps I plan to take in making this change are:                                                                          |                                                                   |
| The person/agency/organization that can support me in making this change is:<br>Name:<br>Contact info:<br>How can they help: |                                                                   |
| How important is it to you to make this change?<br>(1-10 scale)                                                              | How confident are you that you can make this change? (1-10 scale) |

Support people/agency/organization

| Name                                                                          | Role                            | Contact info.  |
|-------------------------------------------------------------------------------|---------------------------------|----------------|
| i.e. Chris Smith                                                              | A friend who helps walk my cat. | (416) 962-7600 |
| (Names the person puts forward while in the mind set of discharge transition) |                                 |                |
|                                                                               |                                 |                |
|                                                                               |                                 |                |

Significant dates/appointments/events following discharge

| Date                     | Details                                                                                                                            |
|--------------------------|------------------------------------------------------------------------------------------------------------------------------------|
| i.e. Jan 1 <sup>st</sup> | My partners birthday                                                                                                               |
|                          | (Some significant dates will be in the chart/discharge summary but this completed box can venture beyond medical appts./referrals) |
|                          |                                                                                                                                    |
|                          |                                                                                                                                    |

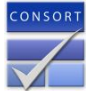

## CONSORT 2010 checklist of information to include when reporting a pilot or feasibility trial\*

| Section/Topic                    | Item No | Checklist item                                                                                                                                                                              | Reported on page No |
|----------------------------------|---------|---------------------------------------------------------------------------------------------------------------------------------------------------------------------------------------------|---------------------|
| <b>Title and abstract</b>        |         |                                                                                                                                                                                             |                     |
|                                  | 1a      | Identification as a pilot or feasibility randomised trial in the title                                                                                                                      | 1                   |
|                                  | 1b      | Structured summary of pilot trial design, methods, results, and conclusions (for specific guidance see CONSORT abstract extension for pilot trials)                                         | 2                   |
| <b>Introduction</b>              |         |                                                                                                                                                                                             |                     |
| Background and objectives        | 2a      | Scientific background and explanation of rationale for future definitive trial, and reasons for randomised pilot trial                                                                      | 4-5                 |
|                                  | 2b      | Specific objectives or research questions for pilot trial                                                                                                                                   | 5                   |
| <b>Methods</b>                   |         |                                                                                                                                                                                             |                     |
| Trial design                     | 3a      | Description of pilot trial design (such as parallel, factorial) including allocation ratio                                                                                                  | 5                   |
|                                  | 3b      | Important changes to methods after pilot trial commencement (such as eligibility criteria), with reasons                                                                                    | N/A                 |
| Participants                     | 4a      | Eligibility criteria for participants                                                                                                                                                       | 6                   |
|                                  | 4b      | Settings and locations where the data were collected                                                                                                                                        | 6                   |
|                                  | 4c      | How participants were identified and consented                                                                                                                                              | 6-7                 |
| Interventions                    | 5       | The interventions for each group with sufficient details to allow replication, including how and when they were actually administered                                                       | 7                   |
| Outcomes                         | 6a      | Completely defined prespecified assessments or measurements to address each pilot trial objective specified in 2b, including how and when they were assessed                                | 8-9, Table 1        |
|                                  | 6b      | Any changes to pilot trial assessments or measurements after the pilot trial commenced, with reasons                                                                                        | N/A                 |
|                                  | 6c      | If applicable, prespecified criteria used to judge whether, or how, to proceed with future definitive trial                                                                                 | N/A                 |
| Sample size                      | 7a      | Rationale for numbers in the pilot trial                                                                                                                                                    | 9                   |
|                                  | 7b      | When applicable, explanation of any interim analyses and stopping guidelines                                                                                                                | N/A                 |
| Randomisation:                   |         |                                                                                                                                                                                             |                     |
| Sequence generation              | 8a      | Method used to generate the random allocation sequence                                                                                                                                      | N/A                 |
|                                  | 8b      | Type of randomisation(s); details of any restriction (such as blocking and block size)                                                                                                      | N/A                 |
| Allocation concealment mechanism | 9       | Mechanism used to implement the random allocation sequence (such as sequentially numbered containers), describing any steps taken to conceal the sequence until interventions were assigned | N/A                 |

|                                                      |     |                                                                                                                                                                                       |             |
|------------------------------------------------------|-----|---------------------------------------------------------------------------------------------------------------------------------------------------------------------------------------|-------------|
| Implementation                                       | 10  | Who generated the random allocation sequence, who enrolled participants, and who assigned participants to interventions                                                               | N/A         |
| Blinding                                             | 11a | If done, who was blinded after assignment to interventions (for example, participants, care providers, those assessing outcomes) and how                                              | N/A         |
|                                                      | 11b | If relevant, description of the similarity of interventions                                                                                                                           | N/A         |
| Statistical methods                                  | 12  | Methods used to address each pilot trial objective whether qualitative or quantitative                                                                                                | 9           |
| <b>Results</b>                                       |     |                                                                                                                                                                                       |             |
| Participant flow (a diagram is strongly recommended) | 13a | For each group, the numbers of participants who were approached and/or assessed for eligibility, randomly assigned, received intended treatment, and were assessed for each objective | 9, Figure 1 |
|                                                      | 13b | For each group, losses and exclusions after randomisation, together with reasons                                                                                                      | 9, Figure 1 |
| Recruitment                                          | 14a | Dates defining the periods of recruitment and follow-up                                                                                                                               | 10          |
|                                                      | 14b | Why the pilot trial ended or was stopped                                                                                                                                              | 10          |
| Baseline data                                        | 15  | A table showing baseline demographic and clinical characteristics for each group                                                                                                      | 10, Table 2 |
| Numbers analysed                                     | 16  | For each objective, number of participants (denominator) included in each analysis. If relevant, these numbers should be by randomised group                                          | 11-12       |
| Outcomes and estimation                              | 17  | For each objective, results including expressions of uncertainty (such as 95% confidence interval) for any estimates. If relevant, these results should be by randomised group        | 12-14       |
| Ancillary analyses                                   | 18  | Results of any other analyses performed that could be used to inform the future definitive trial                                                                                      | N/A         |
| Harms                                                | 19  | All important harms or unintended effects in each group (for specific guidance see CONSORT for harms)                                                                                 | 14          |
|                                                      | 19a | If relevant, other important unintended consequences                                                                                                                                  | N/A         |
| <b>Discussion</b>                                    |     |                                                                                                                                                                                       |             |
| Limitations                                          | 20  | Pilot trial limitations, addressing sources of potential bias and remaining uncertainty about feasibility                                                                             | 15          |
| Generalisability                                     | 21  | Generalisability (applicability) of pilot trial methods and findings to future definitive trial and other studies                                                                     | 15          |
| Interpretation                                       | 22  | Interpretation consistent with pilot trial objectives and findings, balancing potential benefits and harms, and considering other relevant evidence                                   | 15-16       |
|                                                      | 22a | Implications for progression from pilot to future definitive trial, including any proposed amendments                                                                                 | 16          |
| <b>Other information</b>                             |     |                                                                                                                                                                                       |             |
| Registration                                         | 23  | Registration number for pilot trial and name of trial registry                                                                                                                        | N/A         |
| Protocol                                             | 24  | Where the pilot trial protocol can be accessed, if available                                                                                                                          | N/A         |
| Funding                                              | 25  | Sources of funding and other support (such as supply of drugs), role of funders                                                                                                       | 16-17       |
|                                                      | 26  | Ethical approval or approval by research review committee, confirmed with reference number                                                                                            | 17          |



1 Citation: Eldridge SM, Chan CL, Campbell MJ, Bond CM, Hopewell S, Thabane L, et al. CONSORT 2010 statement: extension to randomised pilot and feasibility trials. BMJ. 2016;355.  
2 \*We strongly recommend reading this statement in conjunction with the CONSORT 2010, extension to randomised pilot and feasibility trials, Explanation and Elaboration for important  
3 clarifications on all the items. If relevant, we also recommend reading CONSORT extensions for cluster randomised trials, non-inferiority and equivalence trials, non-pharmacological  
4 treatments, herbal interventions, and pragmatic trials. Additional extensions are forthcoming: for those and for up to date references relevant to this checklist, see [www.consort-statement.org](http://www.consort-statement.org).  
5  
6  
7  
8  
9  
10  
11  
12  
13  
14  
15  
16  
17  
18  
19  
20  
21  
22  
23  
24  
25  
26  
27  
28  
29  
30  
31  
32  
33  
34  
35  
36  
37  
38  
39  
40  
41  
42

For peer review only

## Guidance for Reporting Involvement of Patients and the Public 2 – Short Form (GRIPP2-SF)

| Section and topic                   | Item                                                                                                                                      | Reported on page No. |
|-------------------------------------|-------------------------------------------------------------------------------------------------------------------------------------------|----------------------|
| 1: Aim                              | Report the aim of PPI in the study                                                                                                        | 4                    |
| 2: Methods                          | Provide a clear description of the methods used for PPI in the study                                                                      | 5-6                  |
| 3: Study results                    | Outcomes—Report the results of PPI in the study, including both positive and negative outcomes                                            | 11-12                |
| 4: Discussion and conclusions       | Outcomes—Comment on the extent to which PPI influenced the study overall. Describe positive and negative effects                          | 14-15                |
| 5: Reflections/critical perspective | Comment critically on the study, reflecting on the things that went well and those that did not, so others can learn from this experience | 16                   |
