# Supplementary material for: The ART of conversation: feasibility and acceptability of a pilot peer intervention to help transition complex HIV-positive people from hospital to community
Source: PubMed Central journal article supplement — BMJ Open. 2019 Mar 30;9(3):e026674. doi: 10.1136/bmjopen-2018-026674 (PMC6475144; doi:10.1136/bmjopen-2018-026674), 2019-03-30
Supplement: bmjopen-2018-026674supp001.pdf [file bmjopen-2018-026674supp001.pdf]

**ART of Conversation – Community Transition Planning Forms (CTP)**

*Community transition change plan*

|                                                                                                                                                          |                                                                                    |
|----------------------------------------------------------------------------------------------------------------------------------------------------------|------------------------------------------------------------------------------------|
| <b>Goal #1: HIV Medications</b><br><b>(Note: A CTP form is completed for each area identified by participant)</b>                                        |                                                                                    |
| <i>The change I want to make (or continue making) is:</i>                                                                                                |                                                                                    |
| <i>Some barriers or difficulties that may get in the way are:</i>                                                                                        |                                                                                    |
| <i>The steps I plan to take in making this change are:</i>                                                                                               |                                                                                    |
| <i>The person/agency/organization that can support me in making this change is:</i><br><i>Name:</i><br><i>Contact info:</i><br><i>How can they help:</i> |                                                                                    |
| <i>How important is it to you to make this change?</i><br><i>(1-10 scale)</i>                                                                            | <i>How confident are you that you can make this change?</i><br><i>(1-10 scale)</i> |

*Support people/agency/organization*

| <b>Name</b>                                                                          | <b>Role</b>                            | <b>Contact info.</b>  |
|--------------------------------------------------------------------------------------|----------------------------------------|-----------------------|
| <b>i.e. Chris Smith</b>                                                              | <b>A friend who helps walk my cat.</b> | <b>(416) 962-7600</b> |
| <b>(Names the person puts forward while in the mind set of discharge transition)</b> |                                        |                       |
|                                                                                      |                                        |                       |
|                                                                                      |                                        |                       |

*Significant dates/appointments/events following discharge*

| <b>Date</b>                    | <b>Details</b>                                                                                                                            |
|--------------------------------|-------------------------------------------------------------------------------------------------------------------------------------------|
| <b>i.e. Jan 1<sup>st</sup></b> | <b>My partners birthday</b>                                                                                                               |
|                                | <b>(Some significant dates will be in the chart/discharge summary but this completed box can venture beyond medical appts./referrals)</b> |
|                                |                                                                                                                                           |
|                                |                                                                                                                                           |

*Community transition change plan*

|                                                                                                                                                          |                                                                                    |
|----------------------------------------------------------------------------------------------------------------------------------------------------------|------------------------------------------------------------------------------------|
| <b>Goal #2: Substance Use</b><br><b>(Note: A CTP form is completed for each area identified by participant)</b>                                          |                                                                                    |
| <i>The change I want to make (or continue making) is:</i>                                                                                                |                                                                                    |
| <i>Some barriers or difficulties that may get in the way are:</i>                                                                                        |                                                                                    |
| <i>The steps I plan to take in making this change are:</i>                                                                                               |                                                                                    |
| <i>The person/agency/organization that can support me in making this change is:</i><br><i>Name:</i><br><i>Contact info:</i><br><i>How can they help:</i> |                                                                                    |
| <i>How important is it to you to make this change?</i><br><i>(1-10 scale)</i>                                                                            | <i>How confident are you that you can make this change?</i><br><i>(1-10 scale)</i> |

*Support people/agency/organization*

| <b>Name</b>                                                                          | <b>Role</b>                            | <b>Contact info.</b>  |
|--------------------------------------------------------------------------------------|----------------------------------------|-----------------------|
| <i>i.e. Chris Smith</i>                                                              | <i>A friend who helps walk my cat.</i> | <i>(416) 962-7600</i> |
| <b>(Names the person puts forward while in the mind set of discharge transition)</b> |                                        |                       |
|                                                                                      |                                        |                       |
|                                                                                      |                                        |                       |

*Significant dates/appointments/events following discharge*

| <b>Date</b>                    | <b>Details</b>                                                                                                                            |
|--------------------------------|-------------------------------------------------------------------------------------------------------------------------------------------|
| <i>i.e. Jan 1<sup>st</sup></i> | <i>My partners birthday</i>                                                                                                               |
|                                | <b>(Some significant dates will be in the chart/discharge summary but this completed box can venture beyond medical appts./referrals)</b> |
|                                |                                                                                                                                           |
|                                |                                                                                                                                           |

*Community transition change plan*

|                                                                                                                                                          |                                                                                    |
|----------------------------------------------------------------------------------------------------------------------------------------------------------|------------------------------------------------------------------------------------|
| <b>Goal #3: Open - client-identified</b><br><b>(Note: A CTP form is completed for each area identified by participant)</b>                               |                                                                                    |
| <i>The change I want to make (or continue making) is:</i>                                                                                                |                                                                                    |
| <i>Some barriers or difficulties that may get in the way are:</i>                                                                                        |                                                                                    |
| <i>The steps I plan to take in making this change are:</i>                                                                                               |                                                                                    |
| <i>The person/agency/organization that can support me in making this change is:</i><br><i>Name:</i><br><i>Contact info:</i><br><i>How can they help:</i> |                                                                                    |
| <i>How important is it to you to make this change?</i><br><i>(1-10 scale)</i>                                                                            | <i>How confident are you that you can make this change?</i><br><i>(1-10 scale)</i> |

*Support people/agency/organization*

| <b>Name</b>                                                                          | <b>Role</b>                            | <b>Contact info.</b>  |
|--------------------------------------------------------------------------------------|----------------------------------------|-----------------------|
| <i>i.e. Chris Smith</i>                                                              | <i>A friend who helps walk my cat.</i> | <i>(416) 962-7600</i> |
| <b>(Names the person puts forward while in the mind set of discharge transition)</b> |                                        |                       |
|                                                                                      |                                        |                       |
|                                                                                      |                                        |                       |

*Significant dates/appointments/events following discharge*

| <b>Date</b>                    | <b>Details</b>                                                                                                                            |
|--------------------------------|-------------------------------------------------------------------------------------------------------------------------------------------|
| <i>i.e. Jan 1<sup>st</sup></i> | <i>My partners birthday</i>                                                                                                               |
|                                | <b>(Some significant dates will be in the chart/discharge summary but this completed box can venture beyond medical appts./referrals)</b> |
|                                |                                                                                                                                           |
|                                |                                                                                                                                           |
